# Supplementary material for: Concussion Guidelines Step 2: Evidence for Subtype Classification
Source: PubMed Central journal article supplement — Neurosurgery. 2019 Aug 21;86(1):2–13. doi: 10.1093/neuros/nyz332 (PMC6911735; doi:10.1093/neuros/nyz332), 2019-08-21

# Supplemental Digital Content. Appendix.

## Prevalence (Cognitive) in Pediatric Concussion Patients

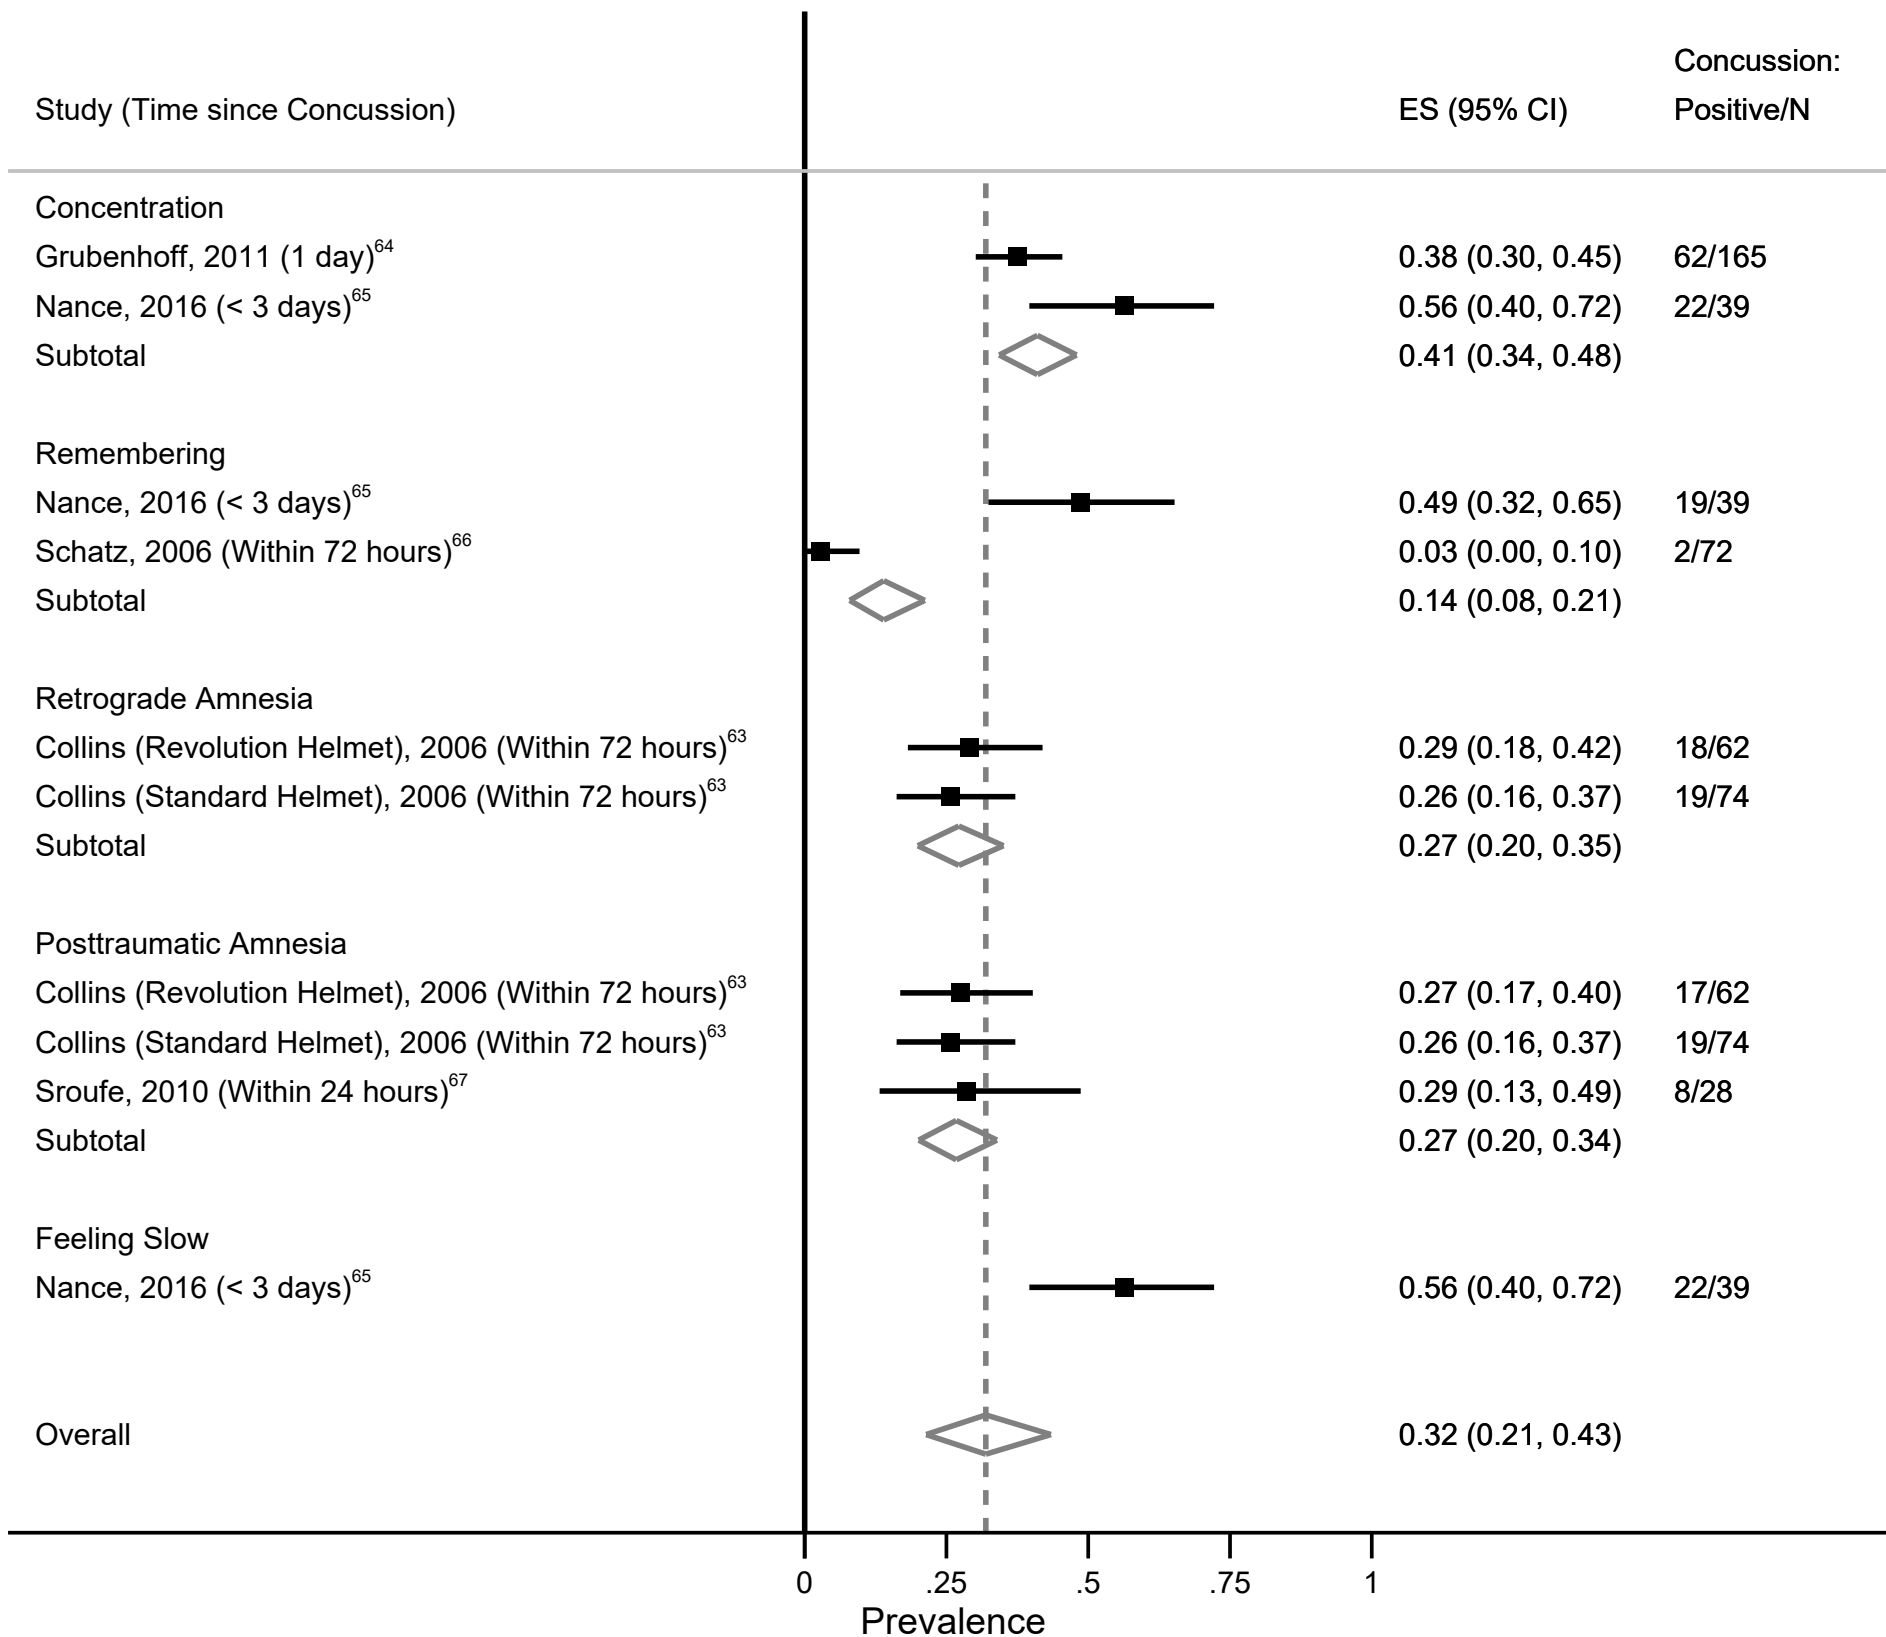

# Prevalence (Cognitive) in Adult Concussion Patients

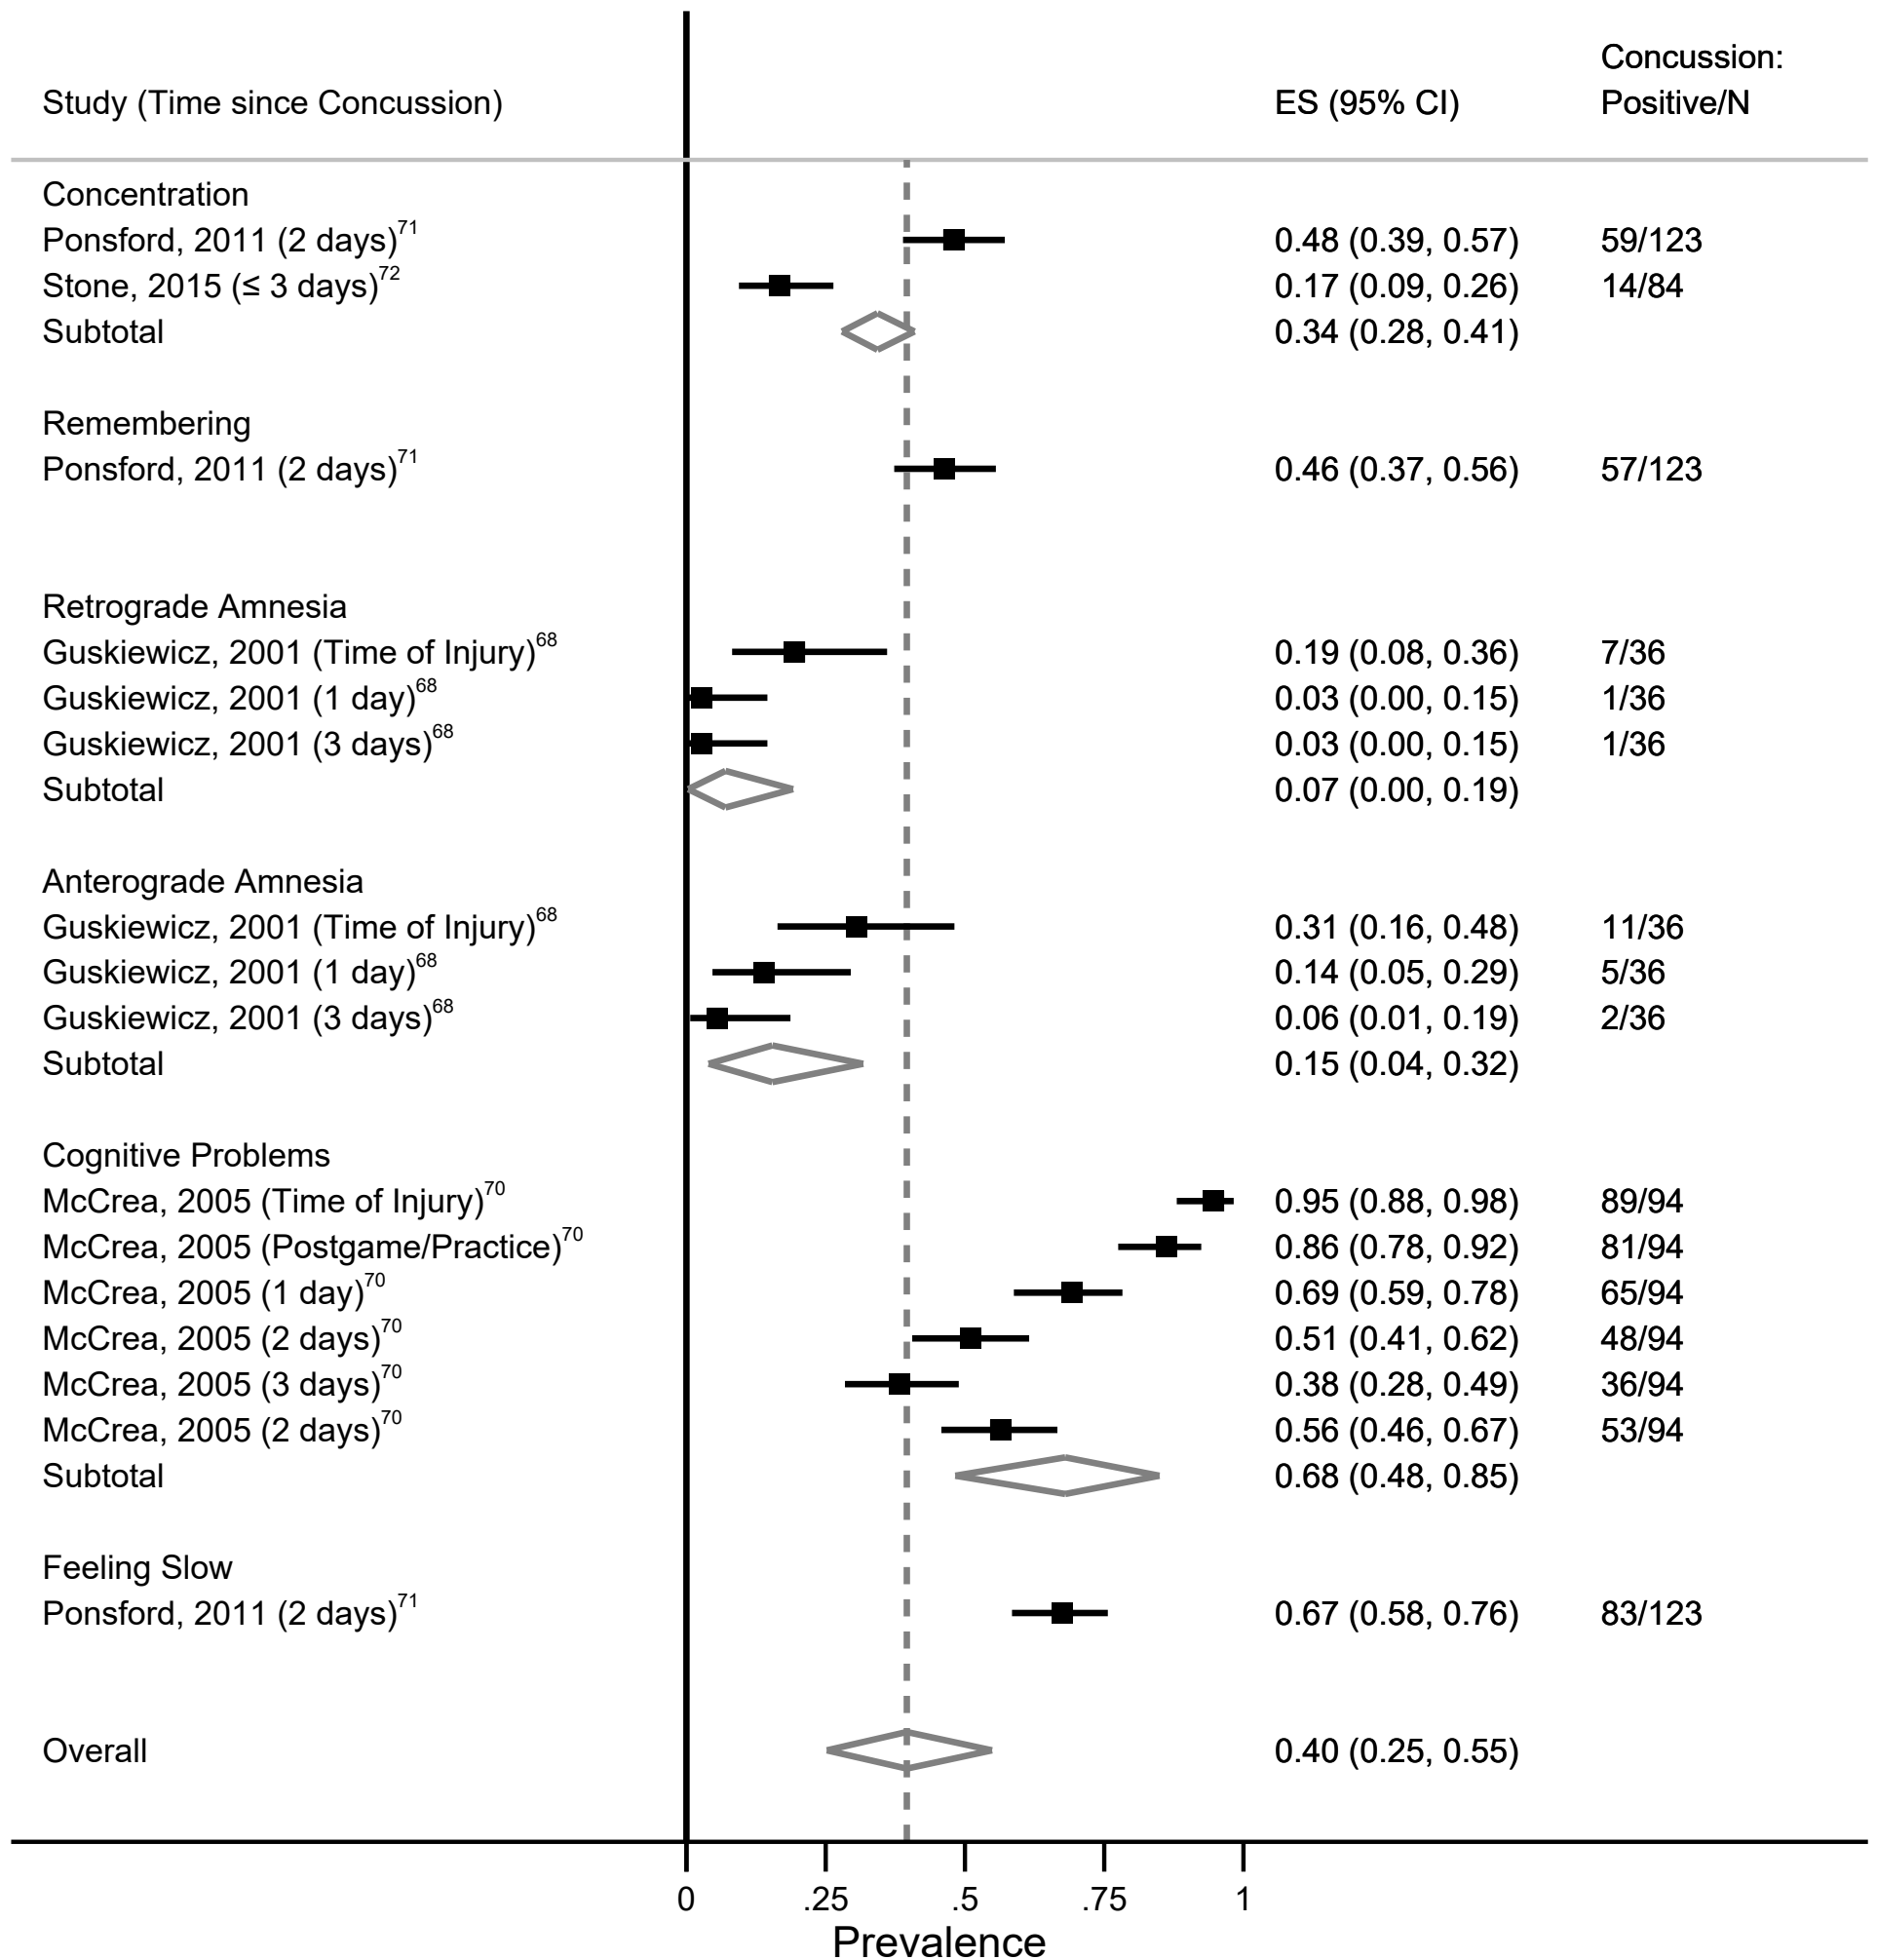

# Prevalence (Ocular-Motor) in Pediatric Concussion Patients

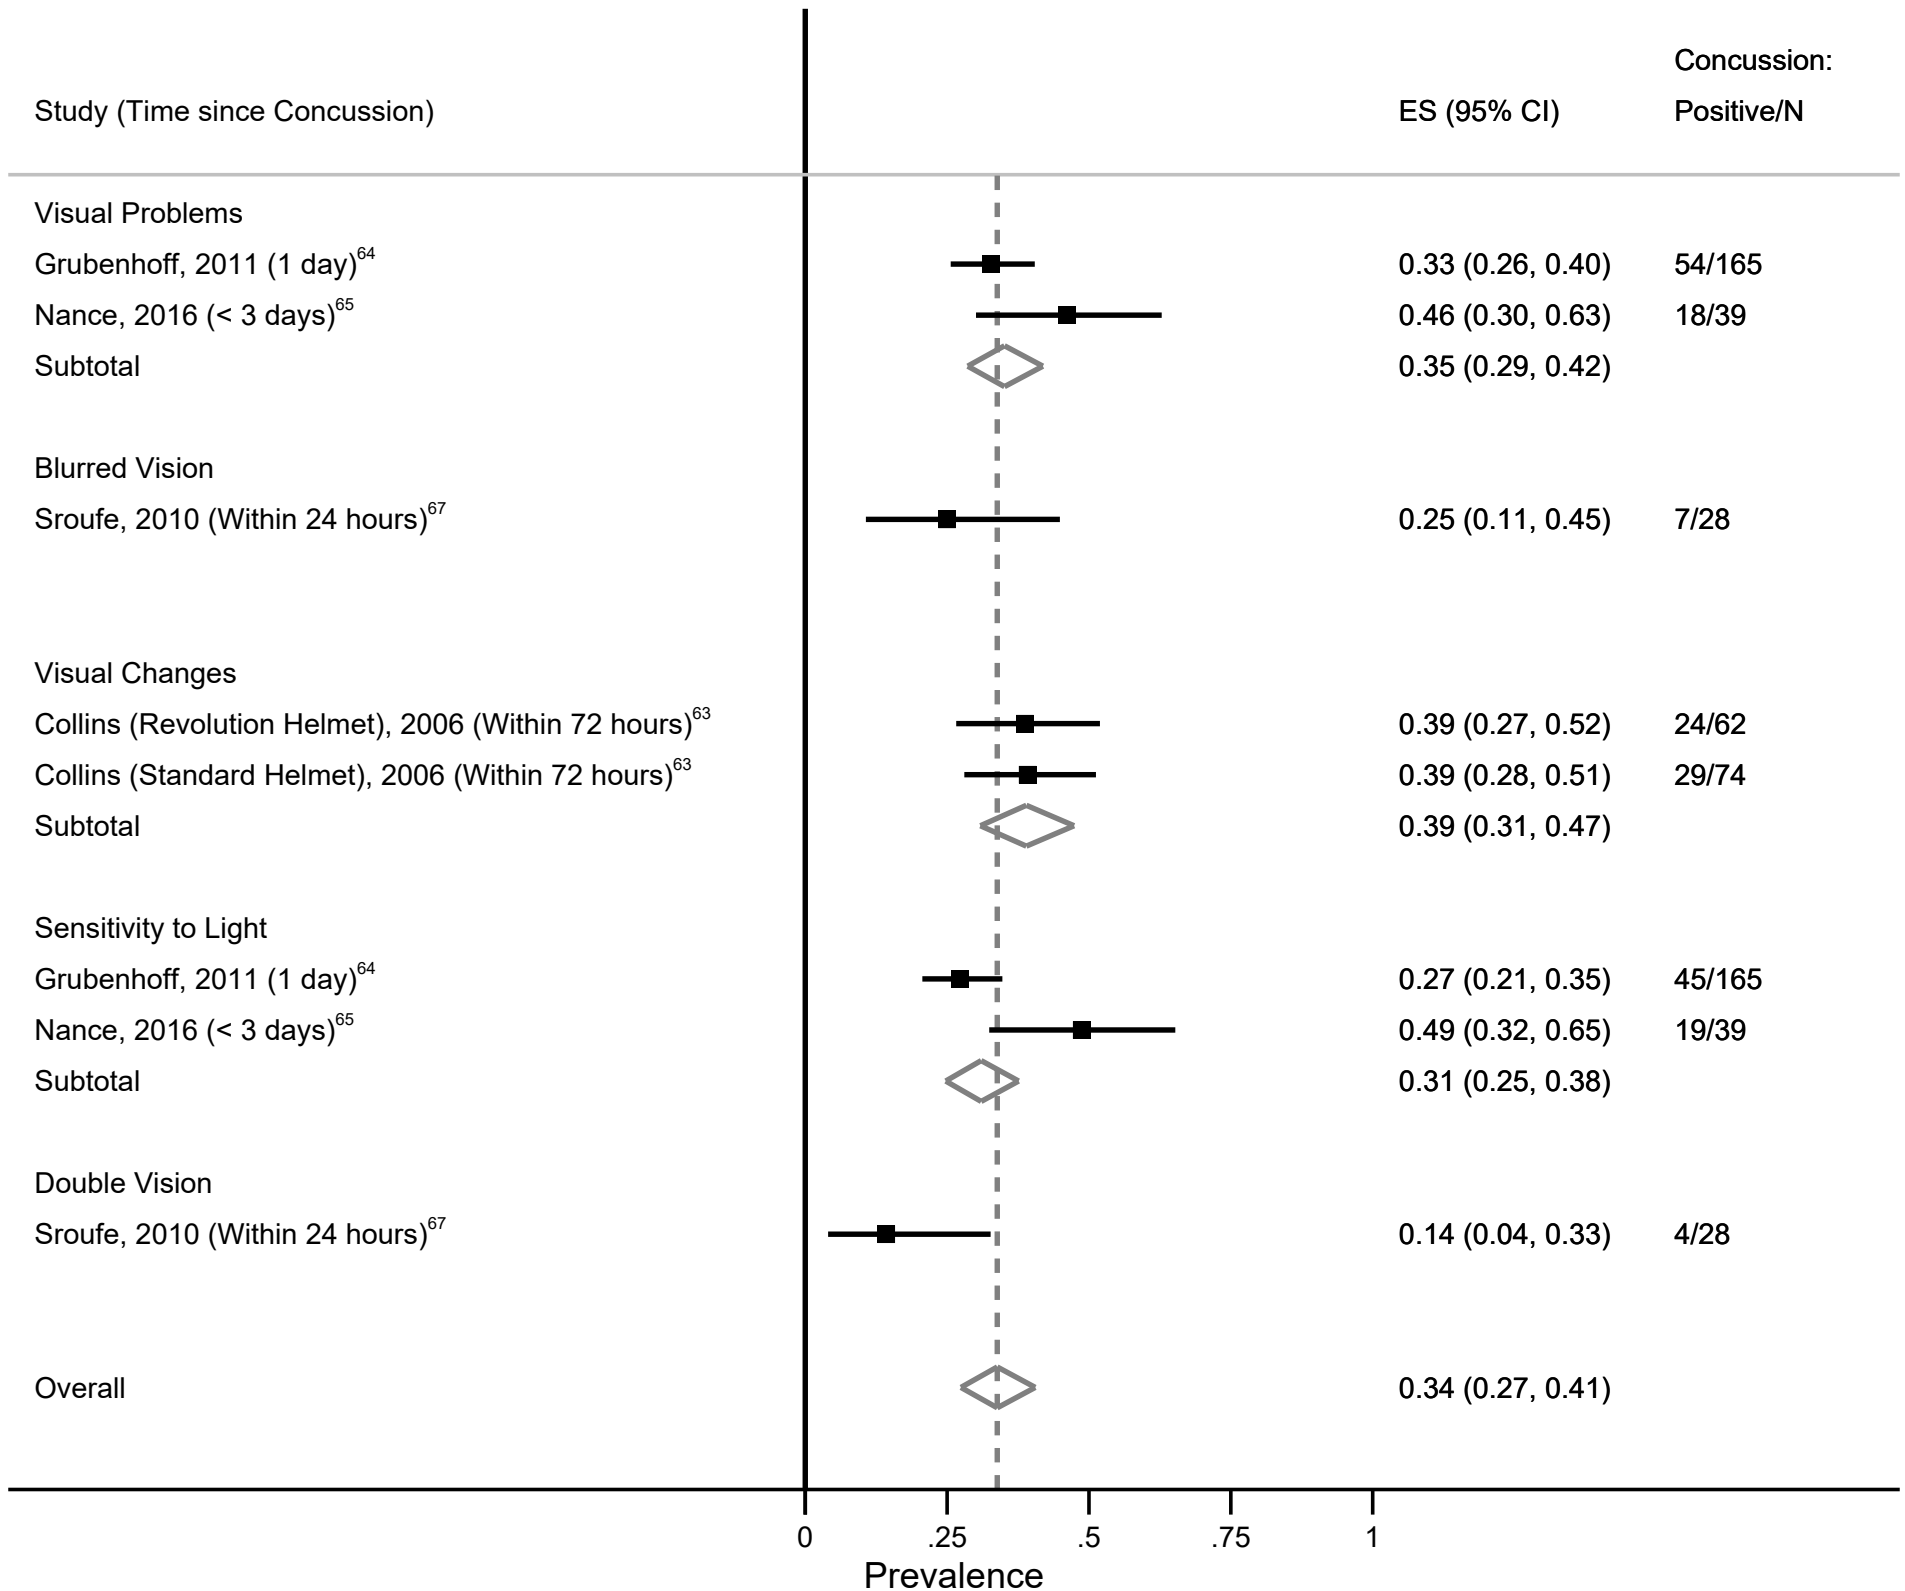

# Prevalence (Ocular-Motor) in Adult Concussion Patients

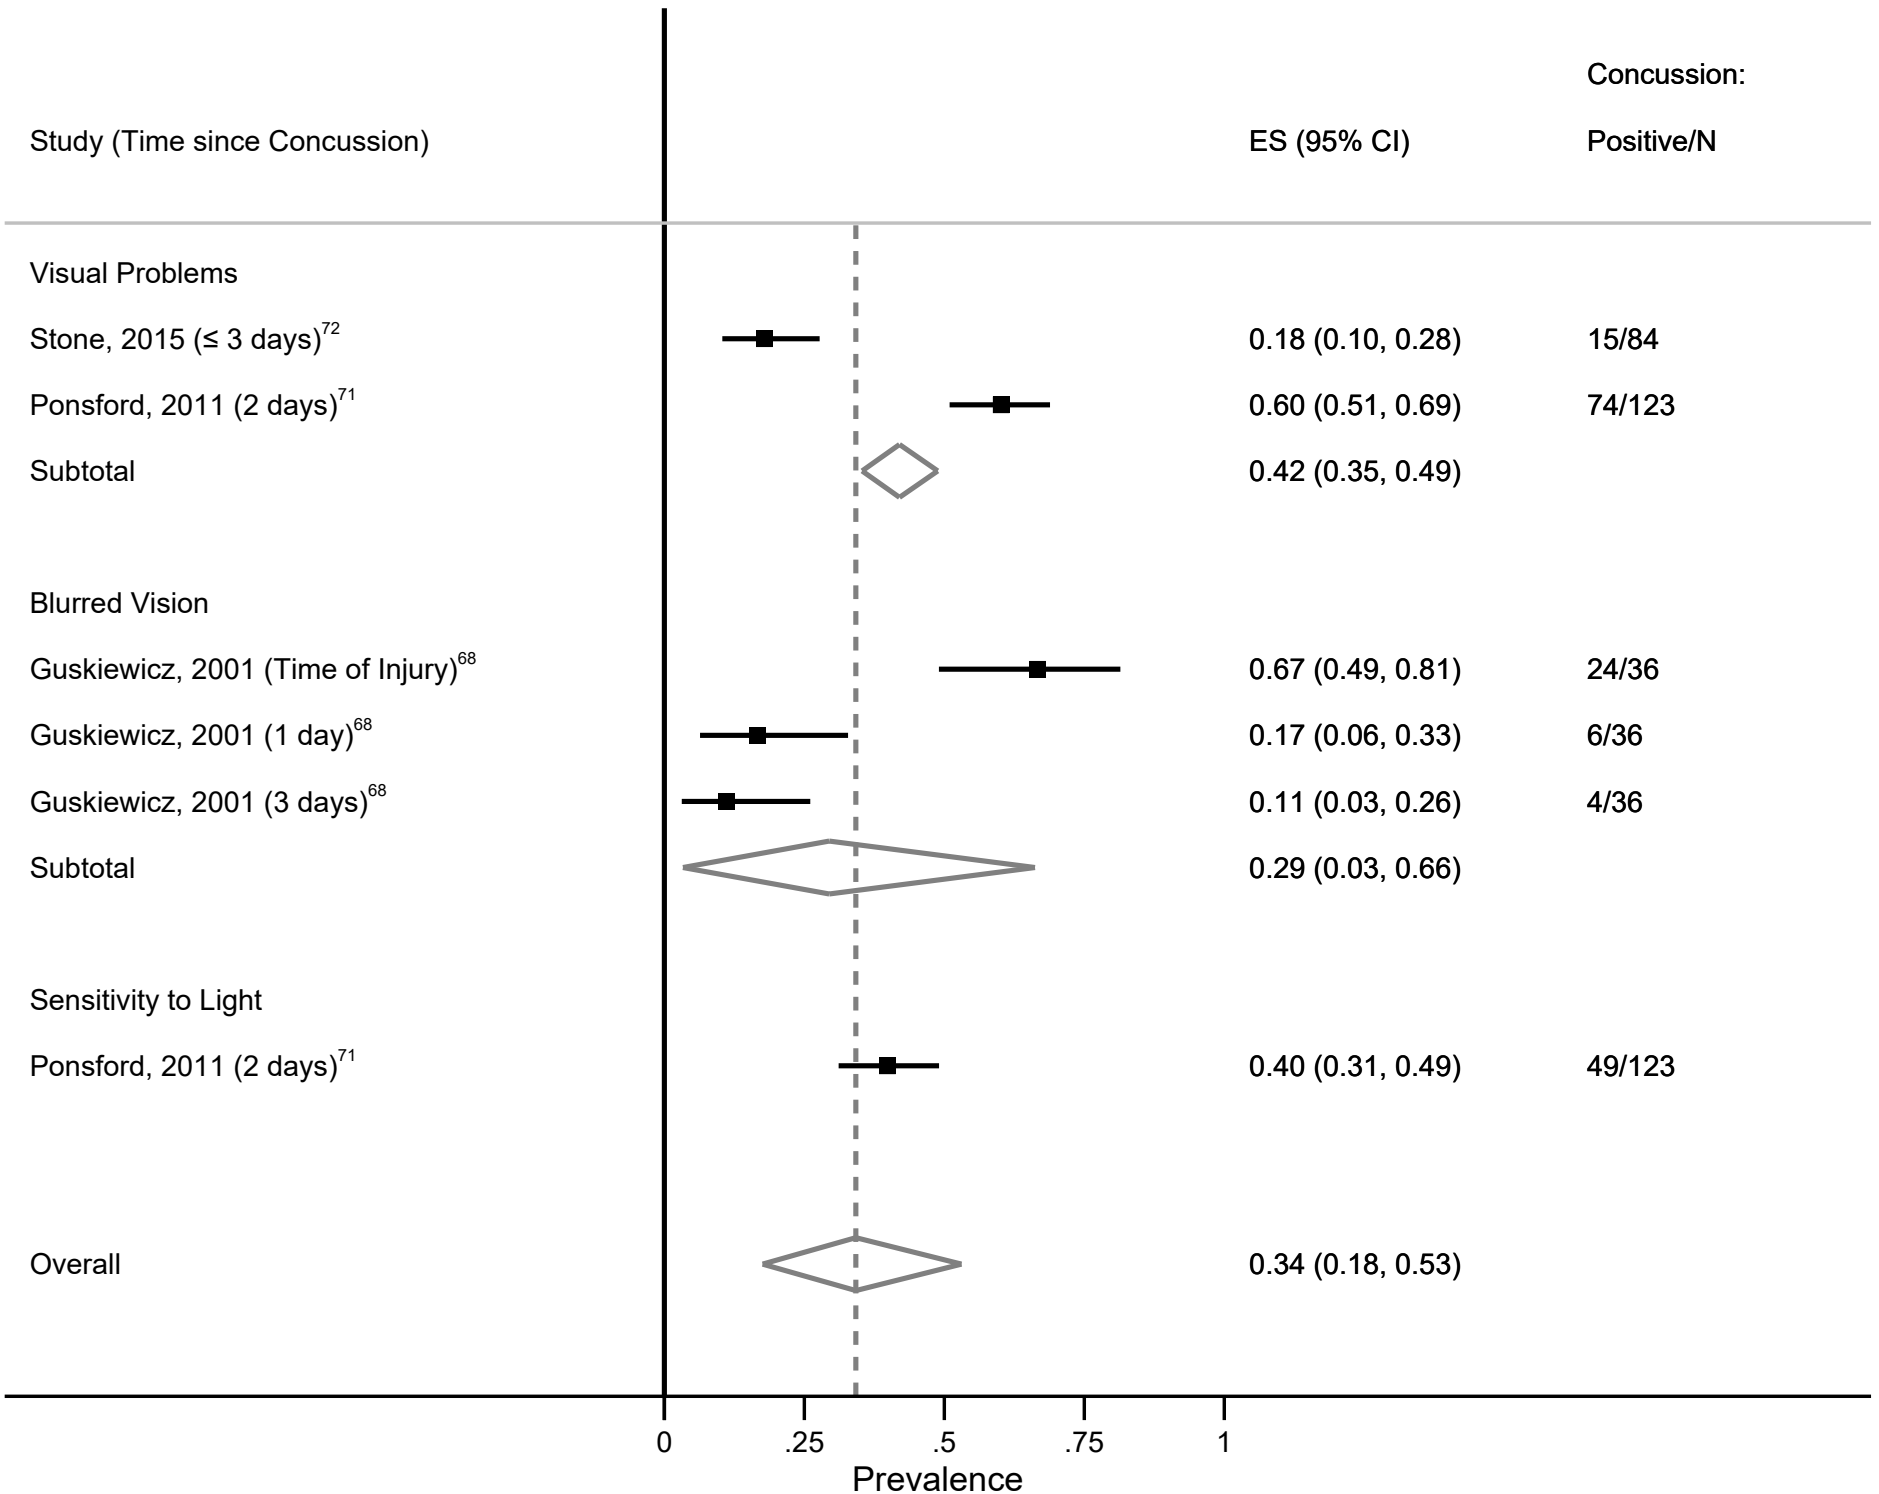

# Prevalence (Headache/Migraine) in Pediatric Concussion Patients

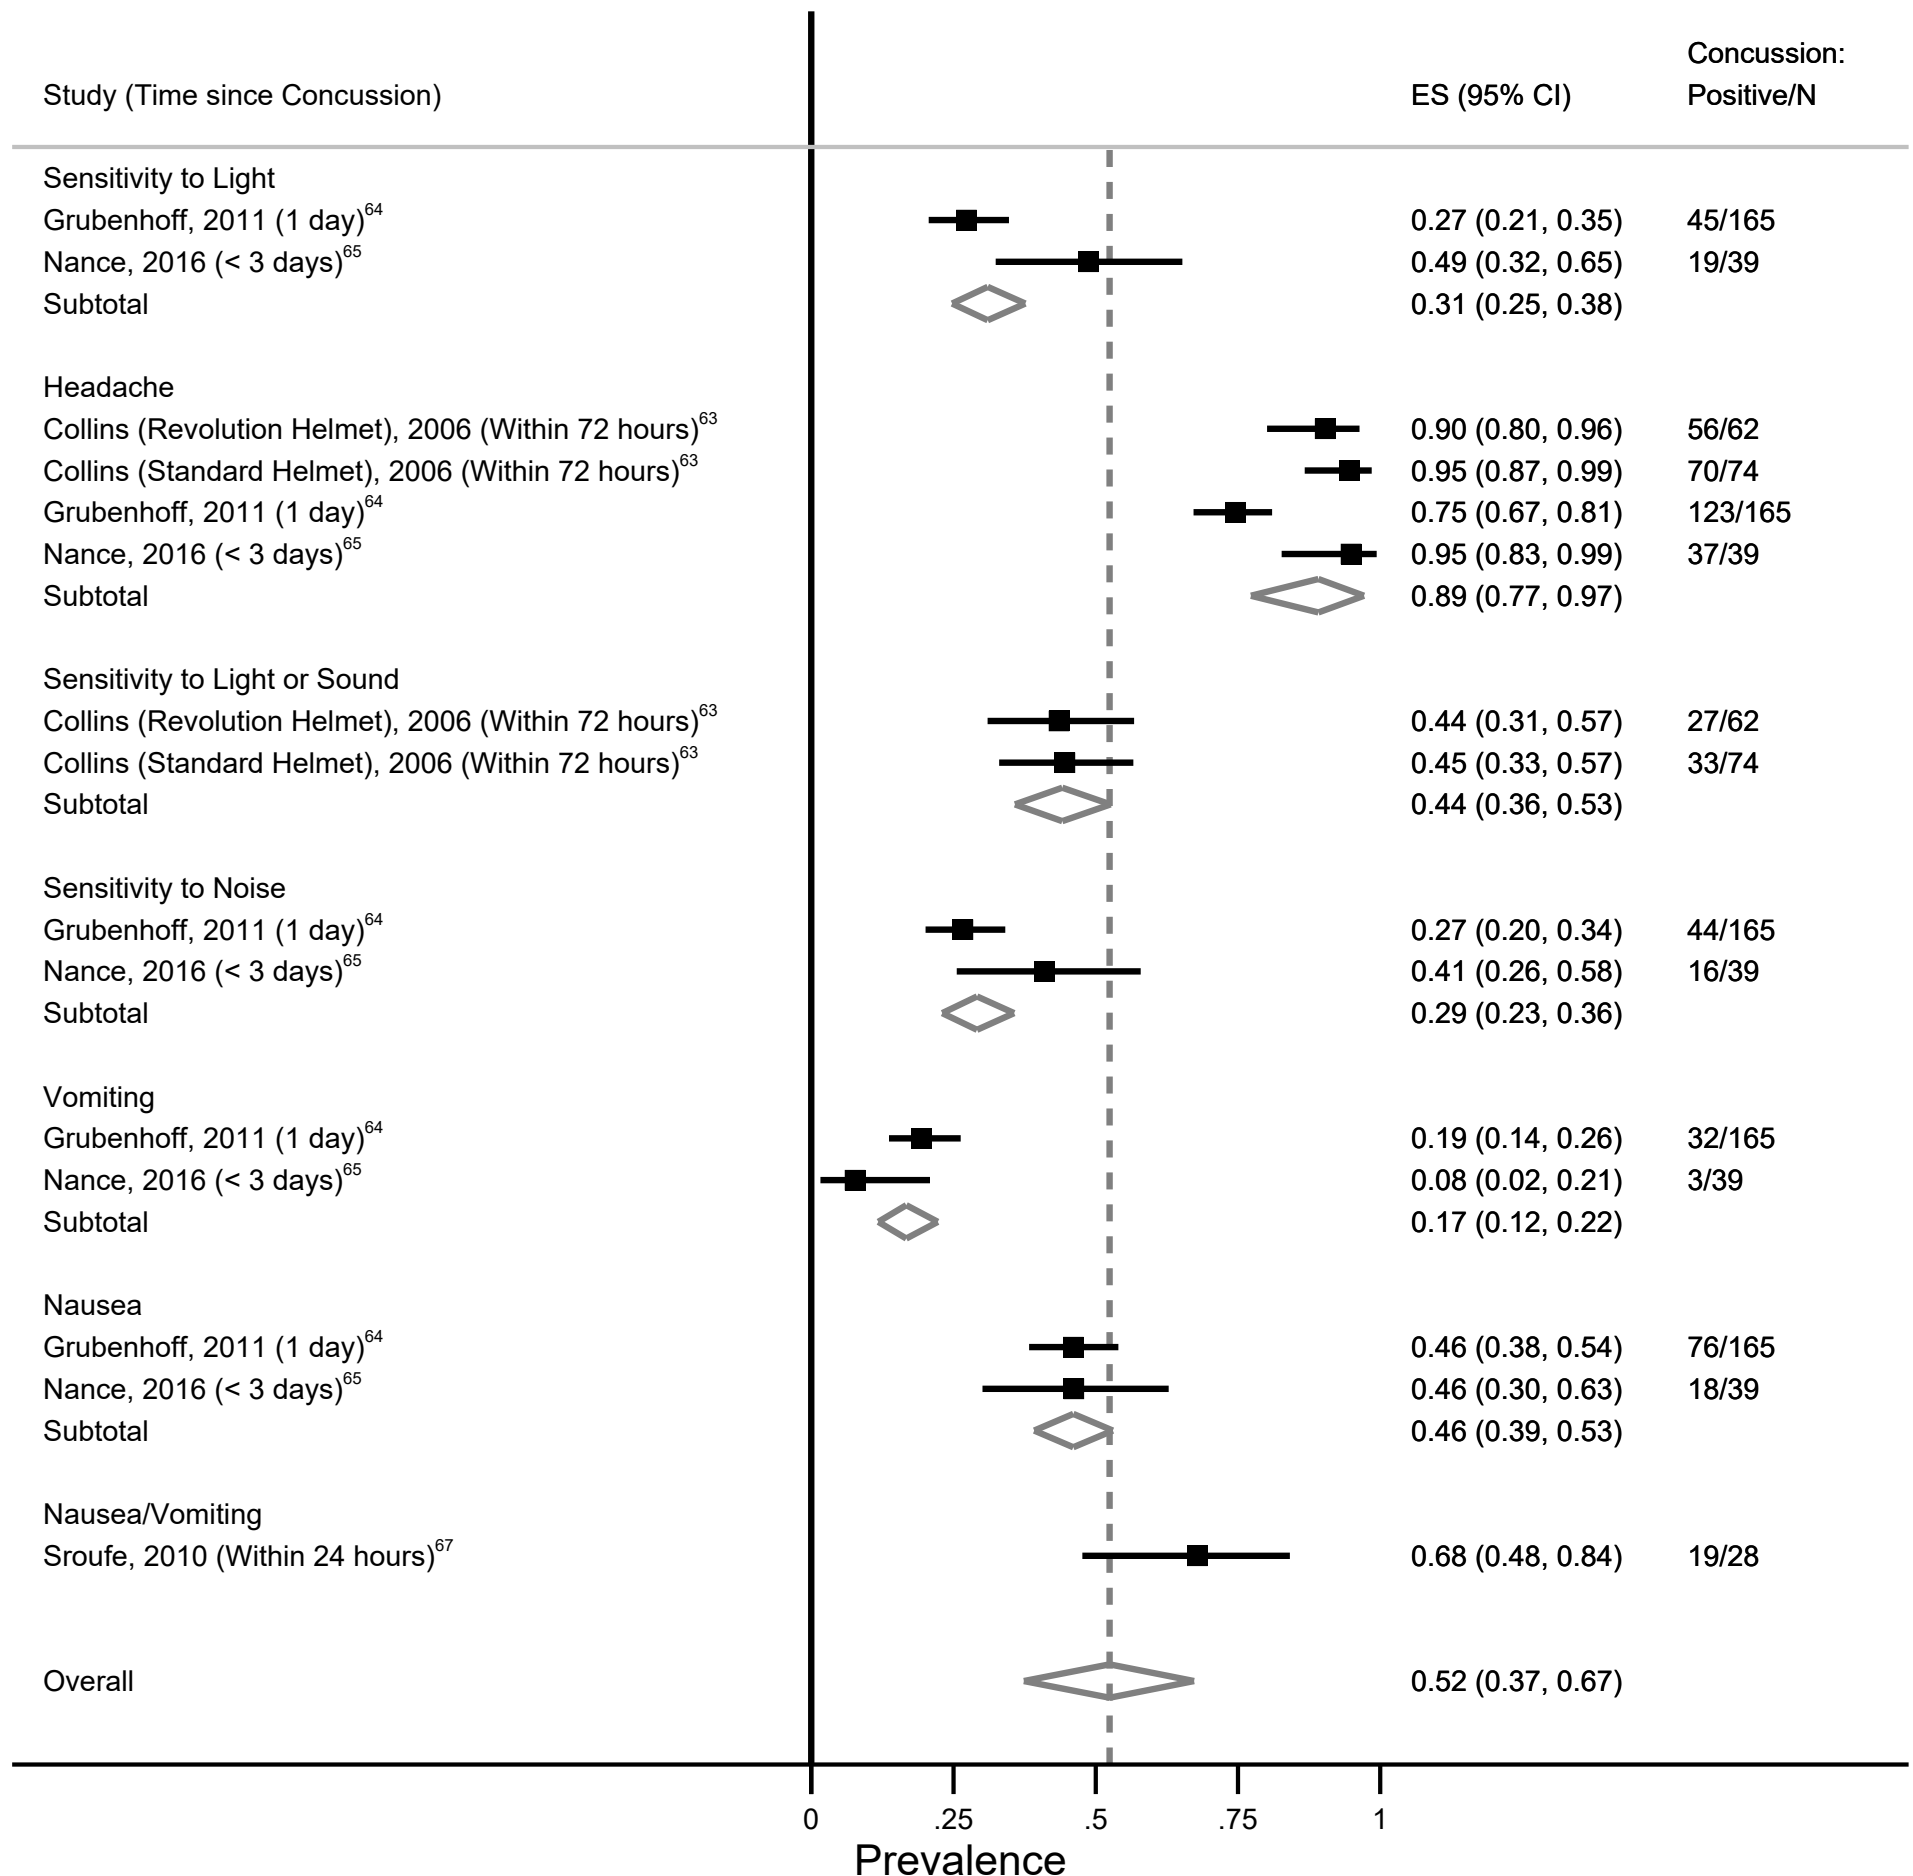

# Prevalence (Headache/Migraine) in Adult Concussion Patients

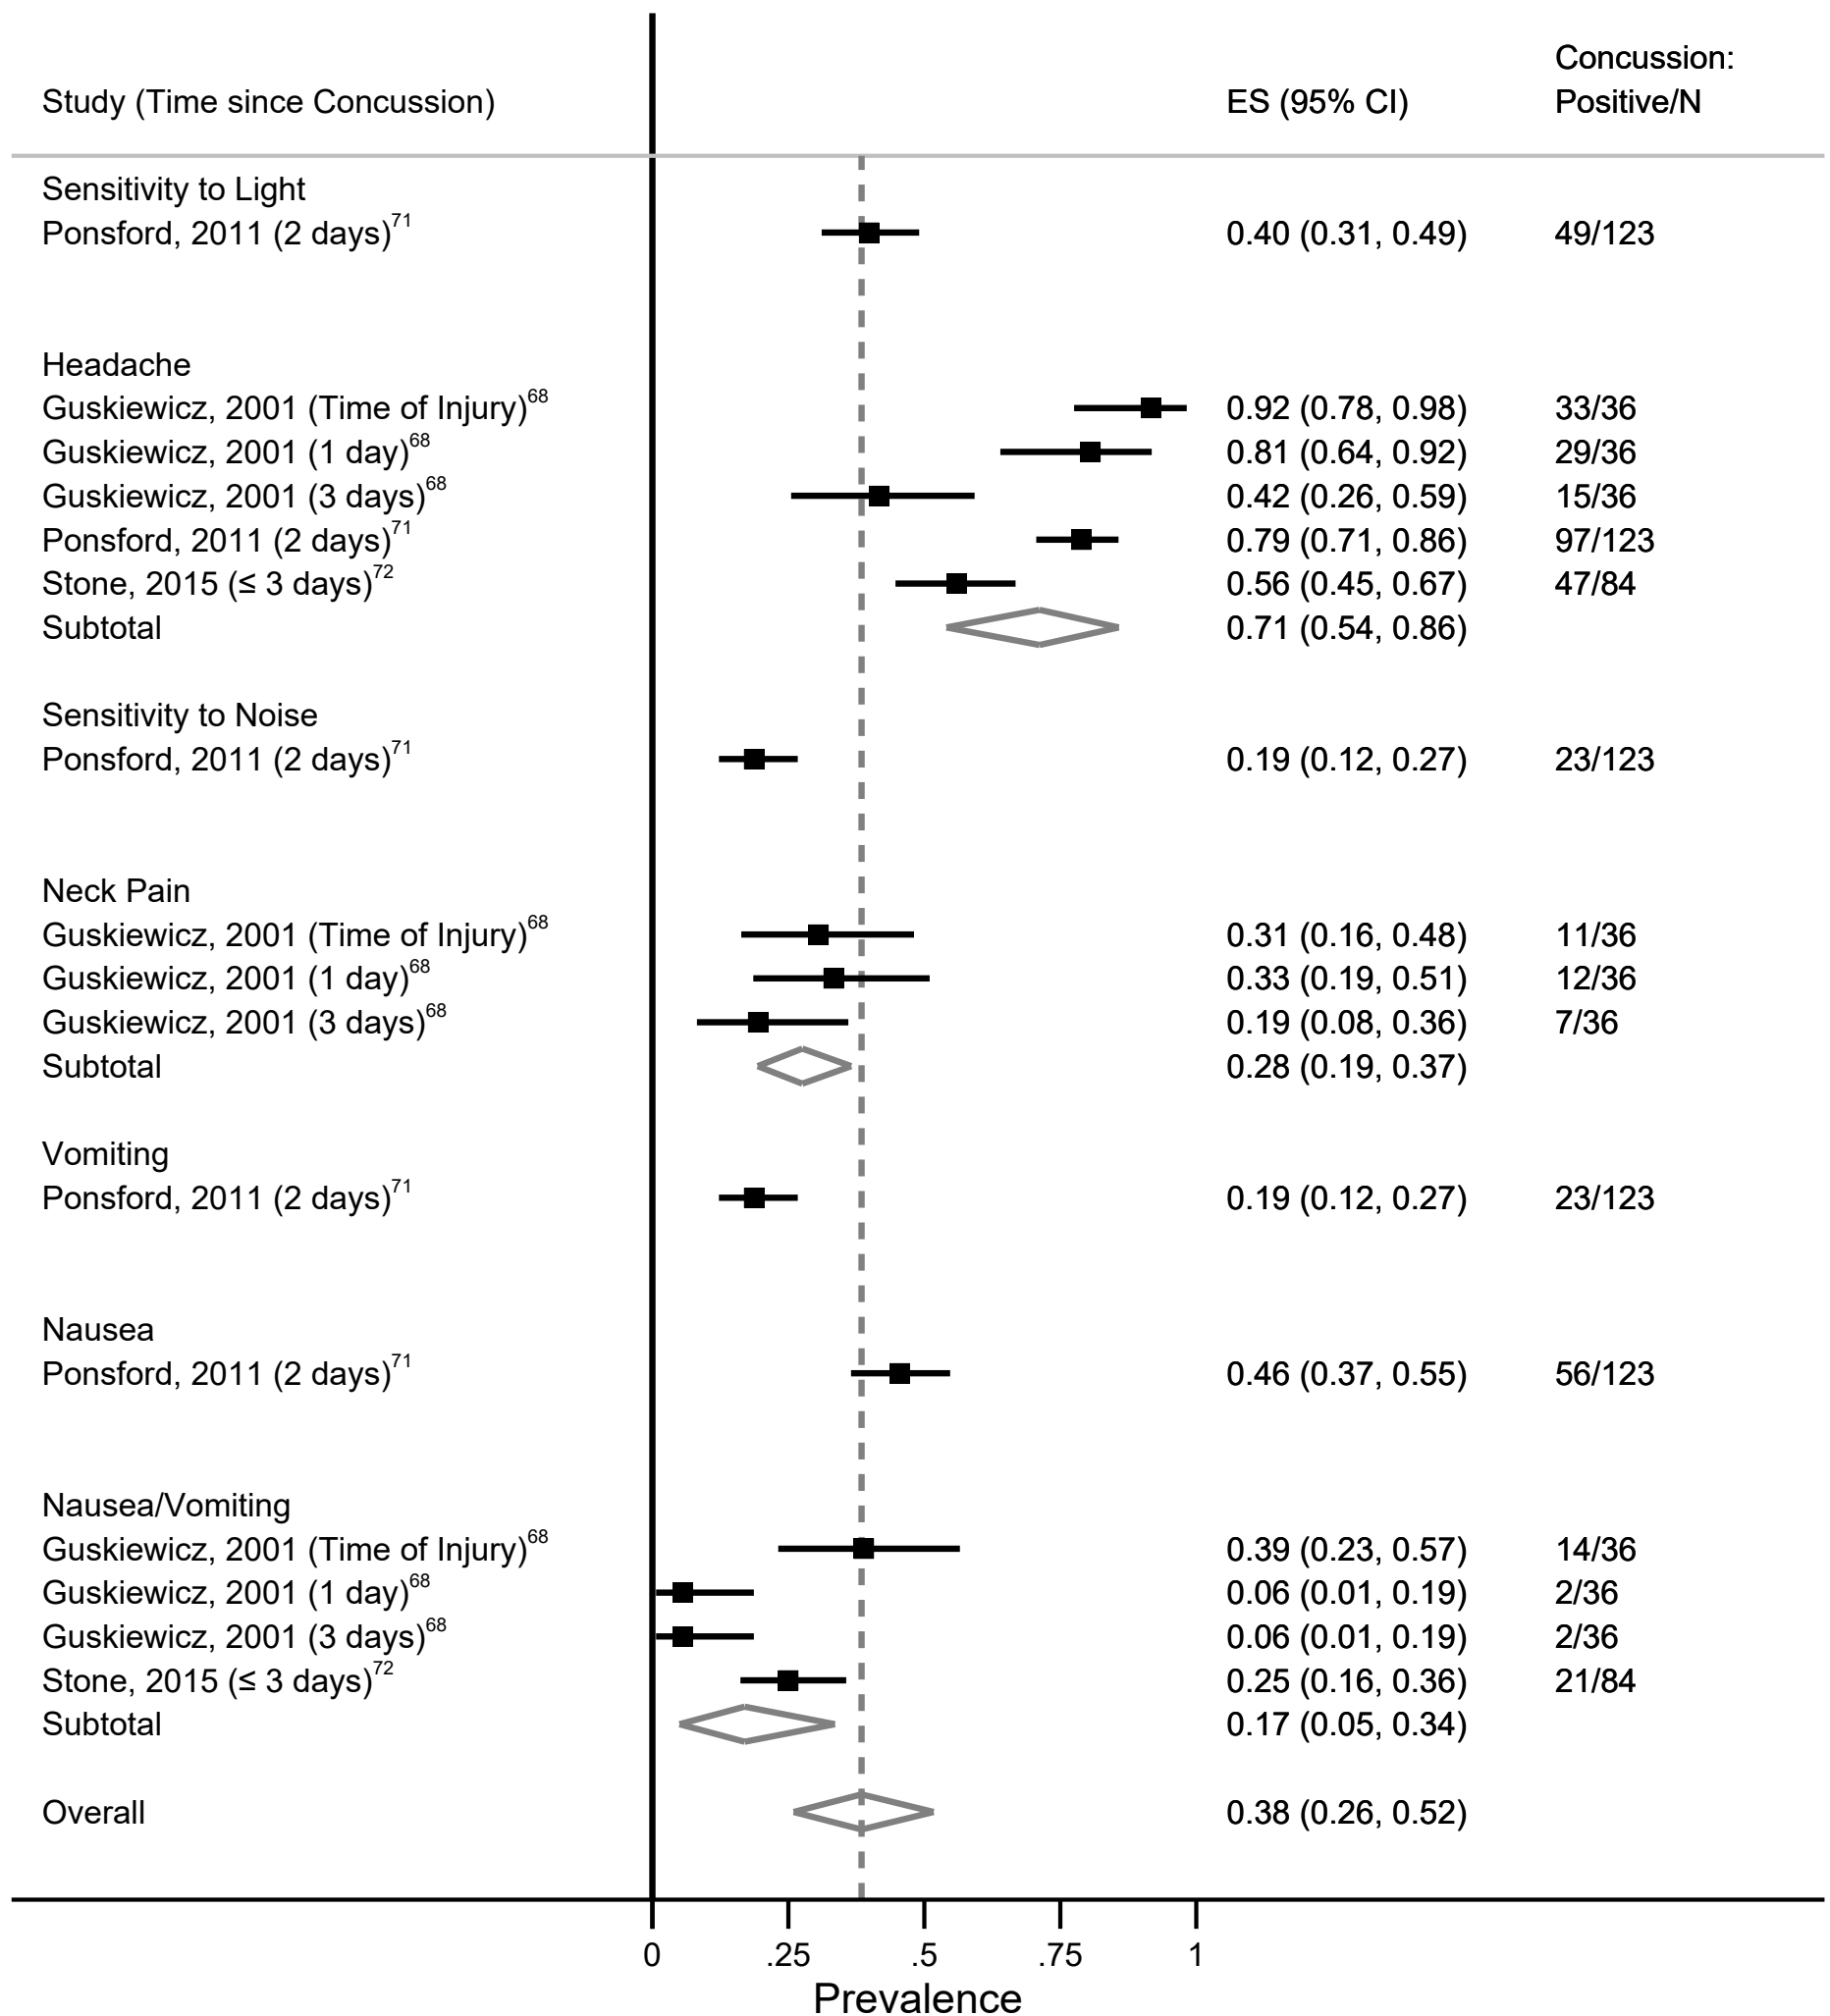

# Prevalence (Vestibular) in Pediatric Concussion Patients

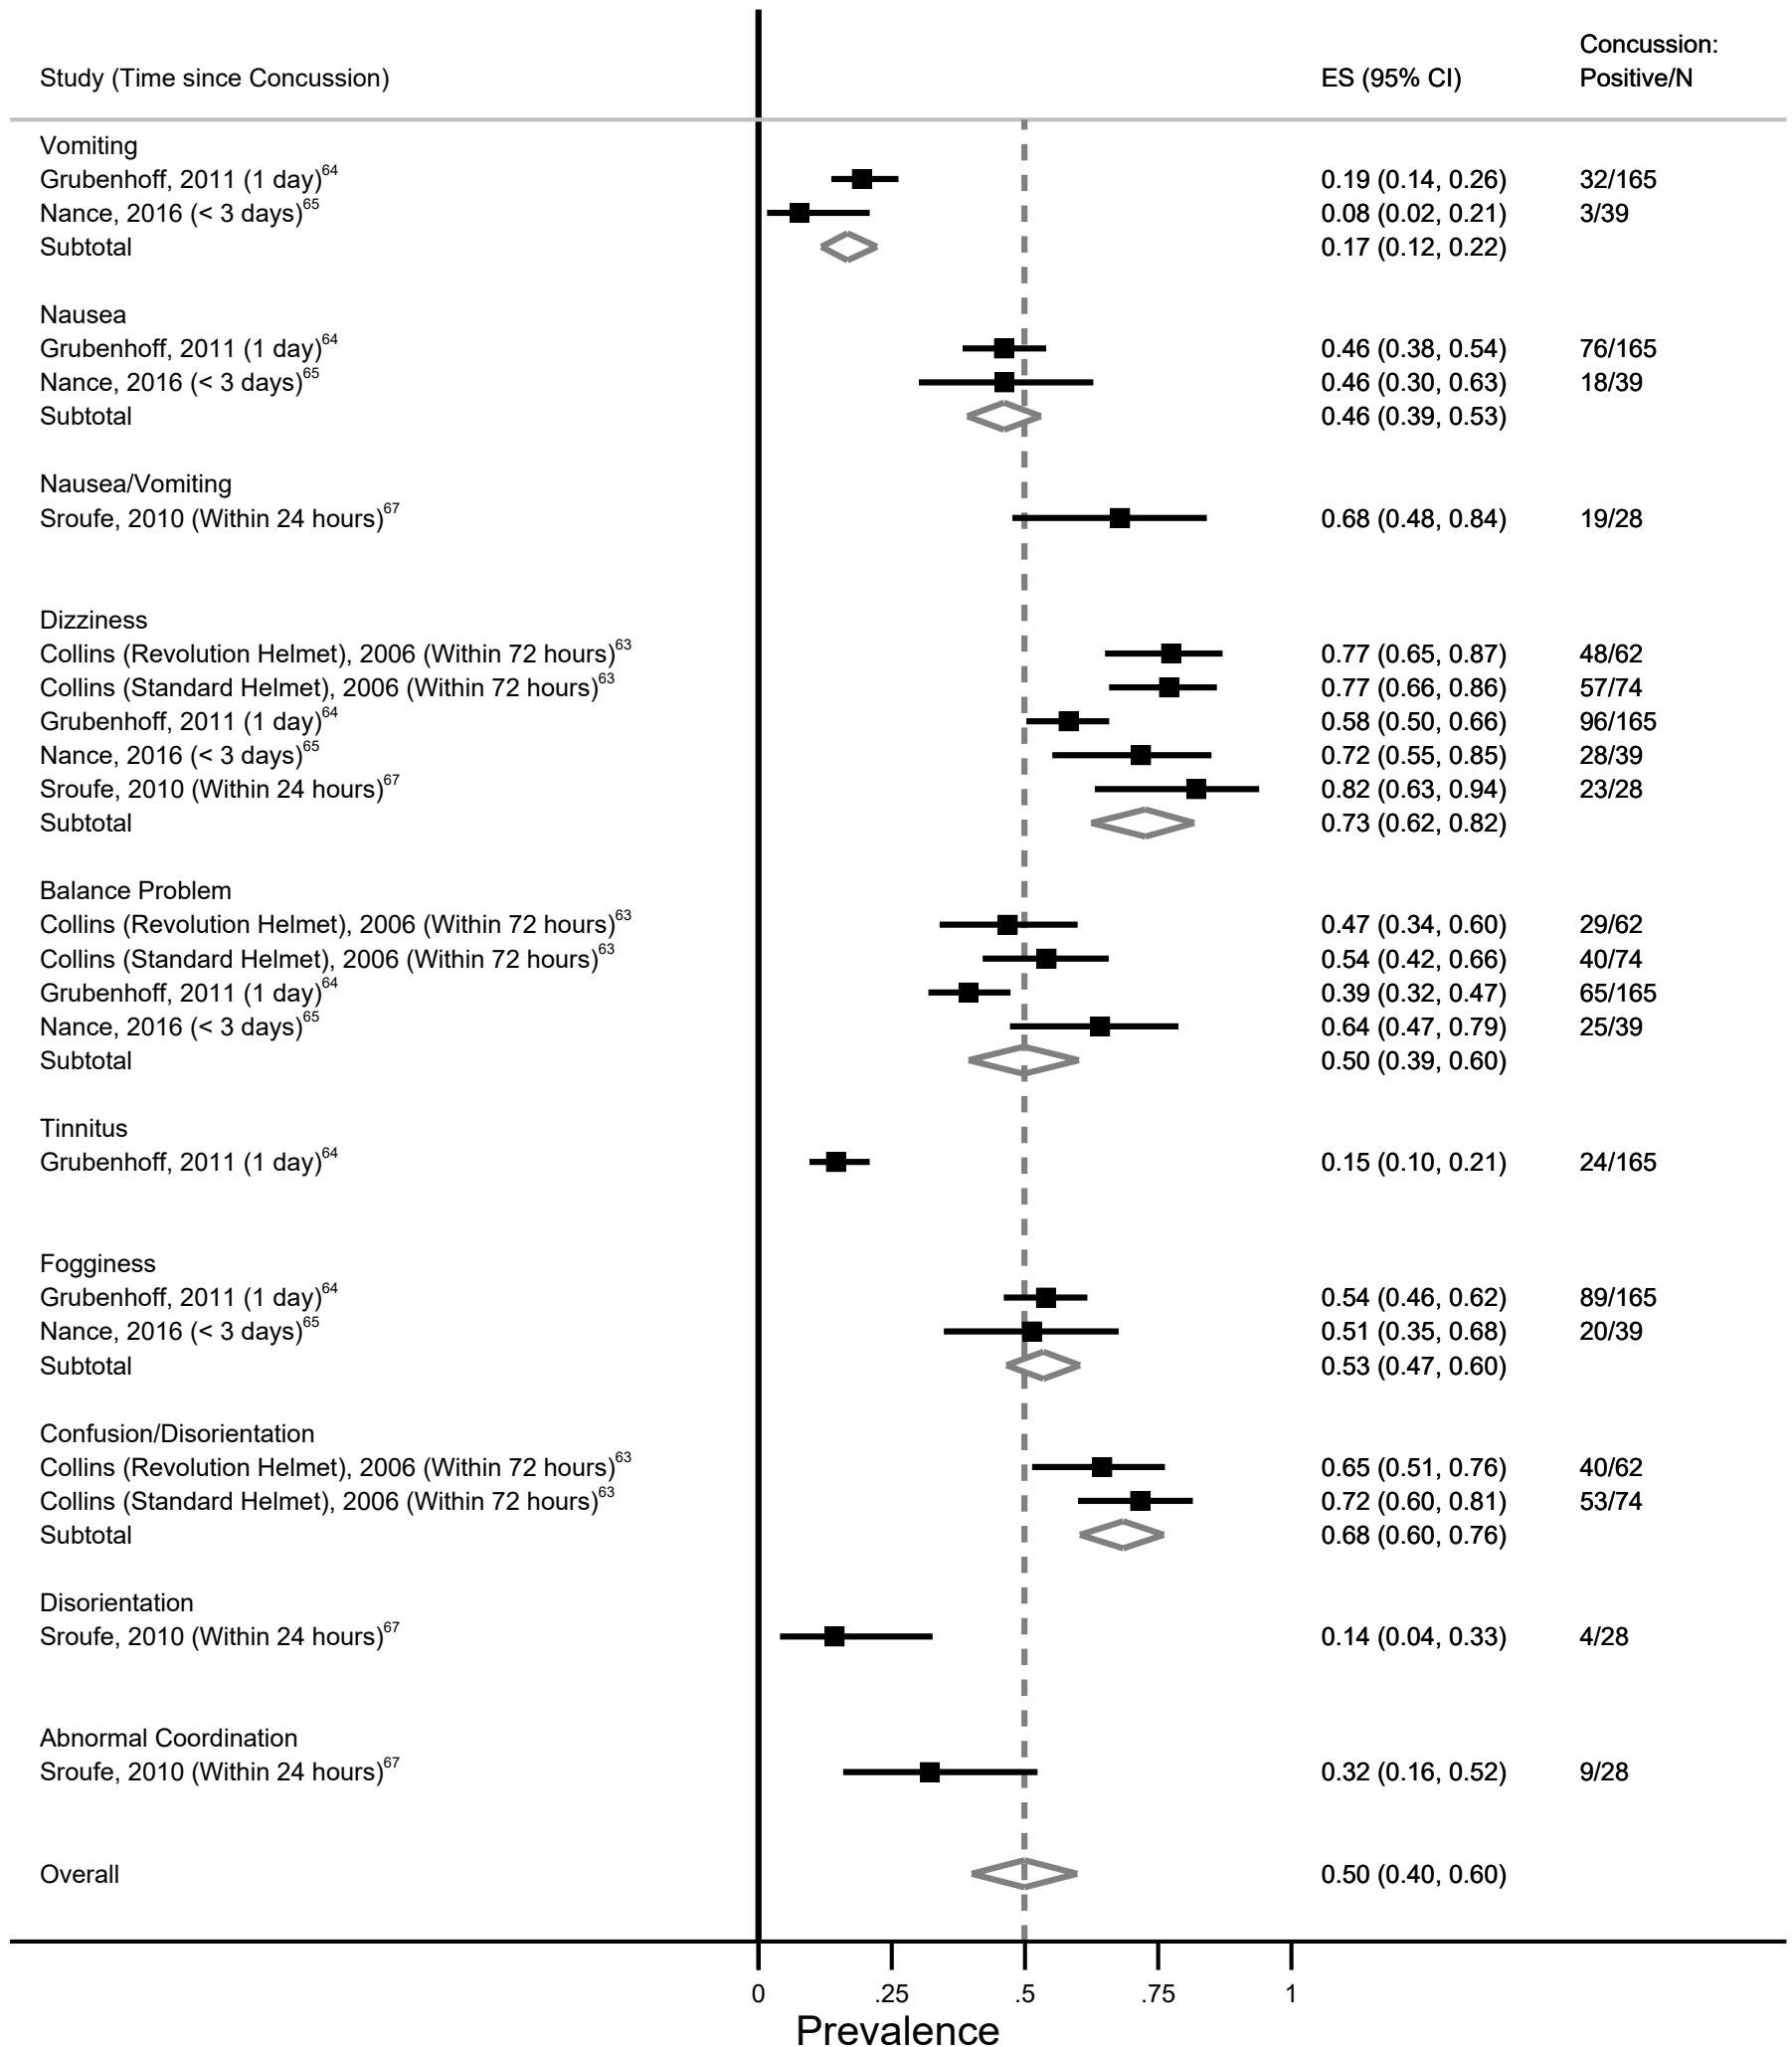

# Prevalence (Vestibular) in Adult Concussion Patients

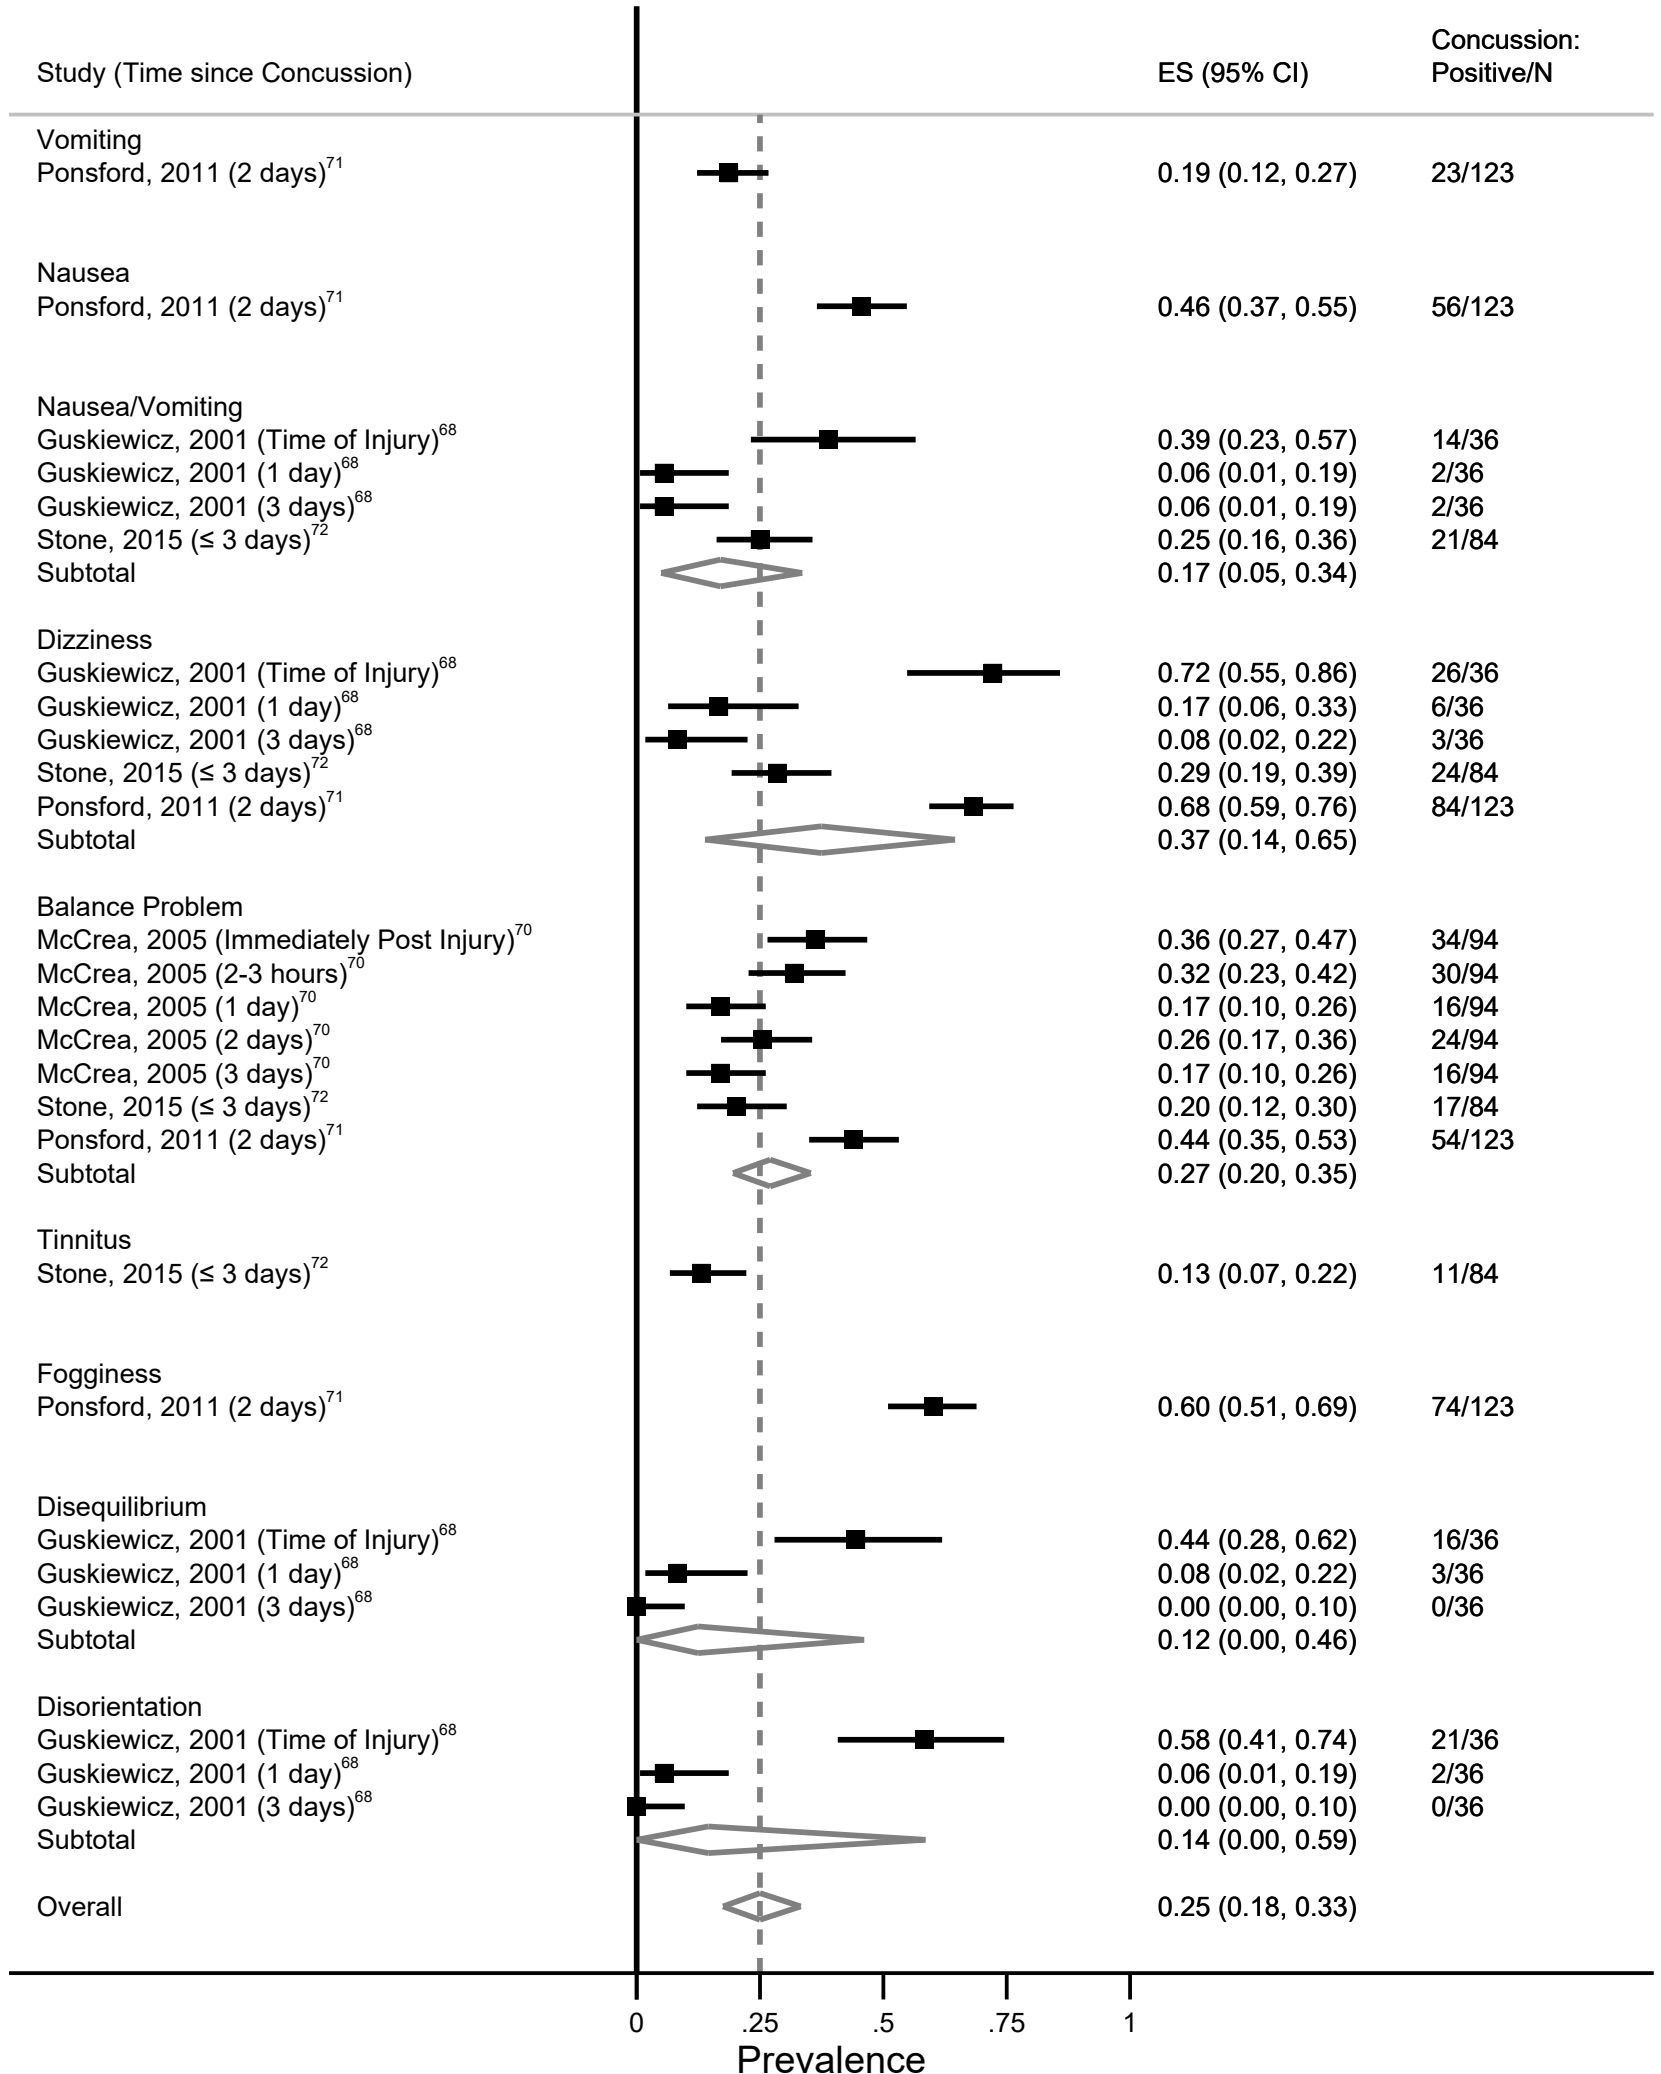



# Prevalence (Anxiety/Mood) in Pediatric Concussion Patients

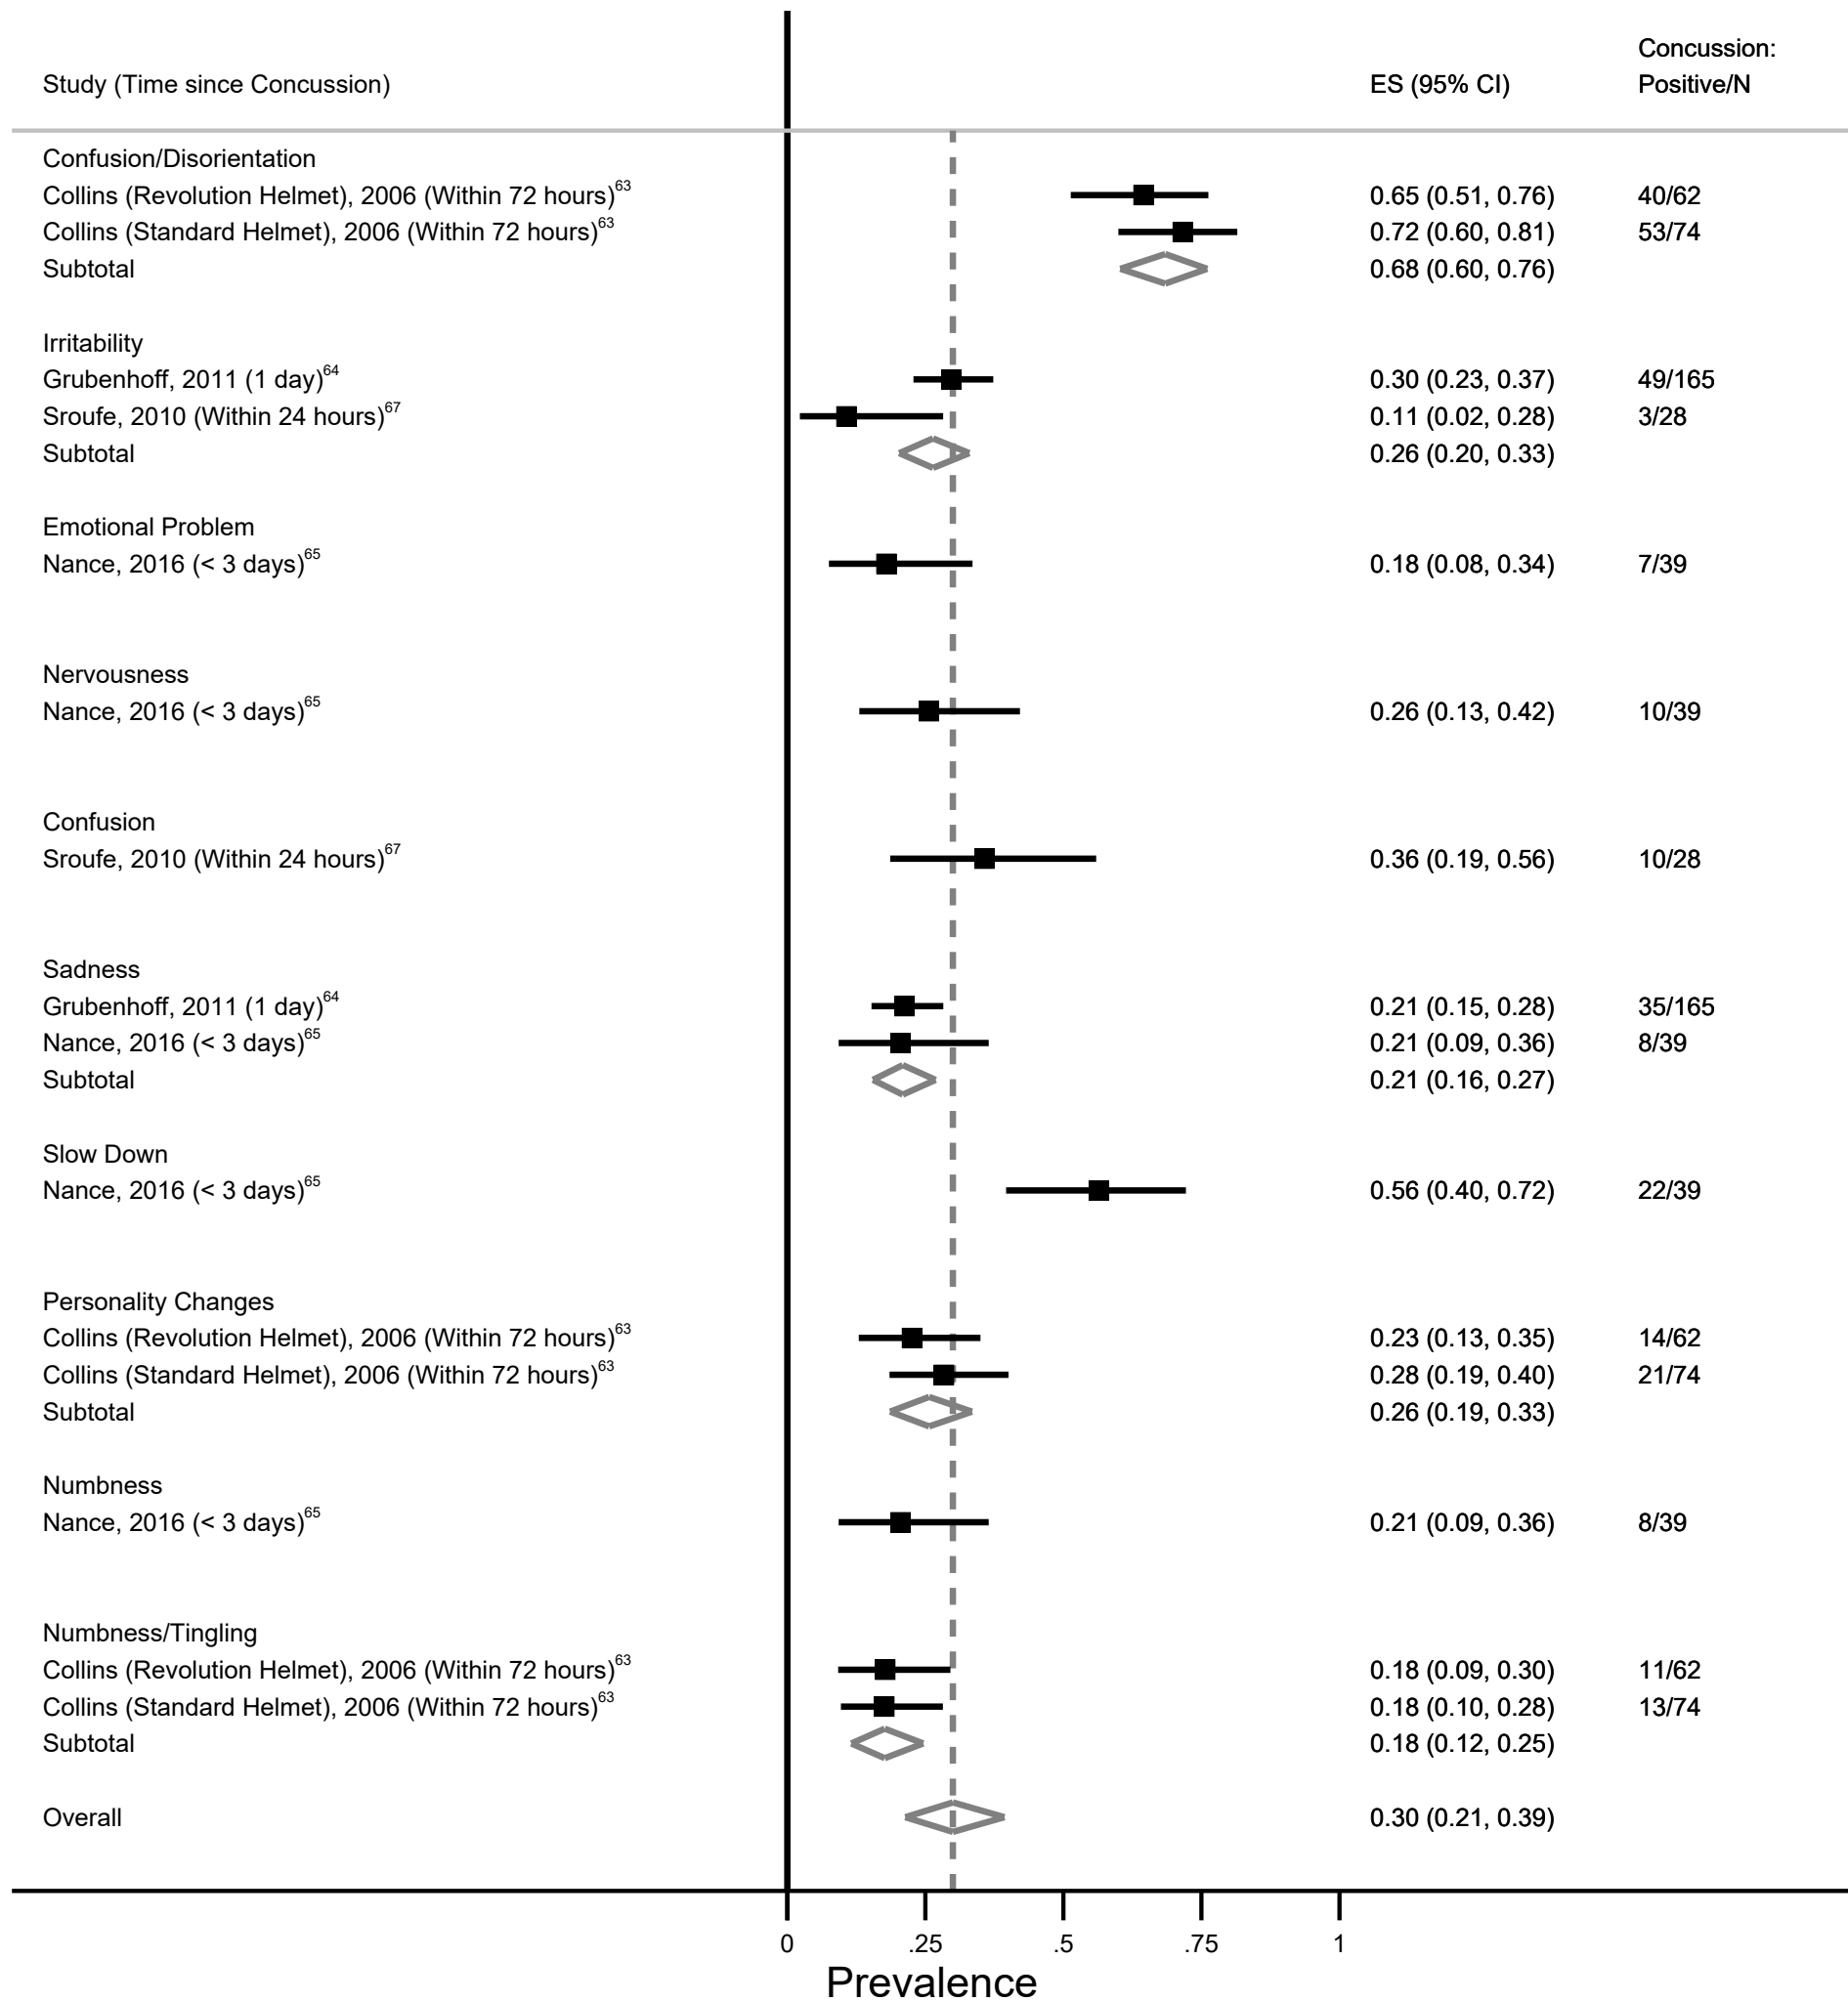

# Prevalence (Anxiety/Mood) in Adult Concussion Patients

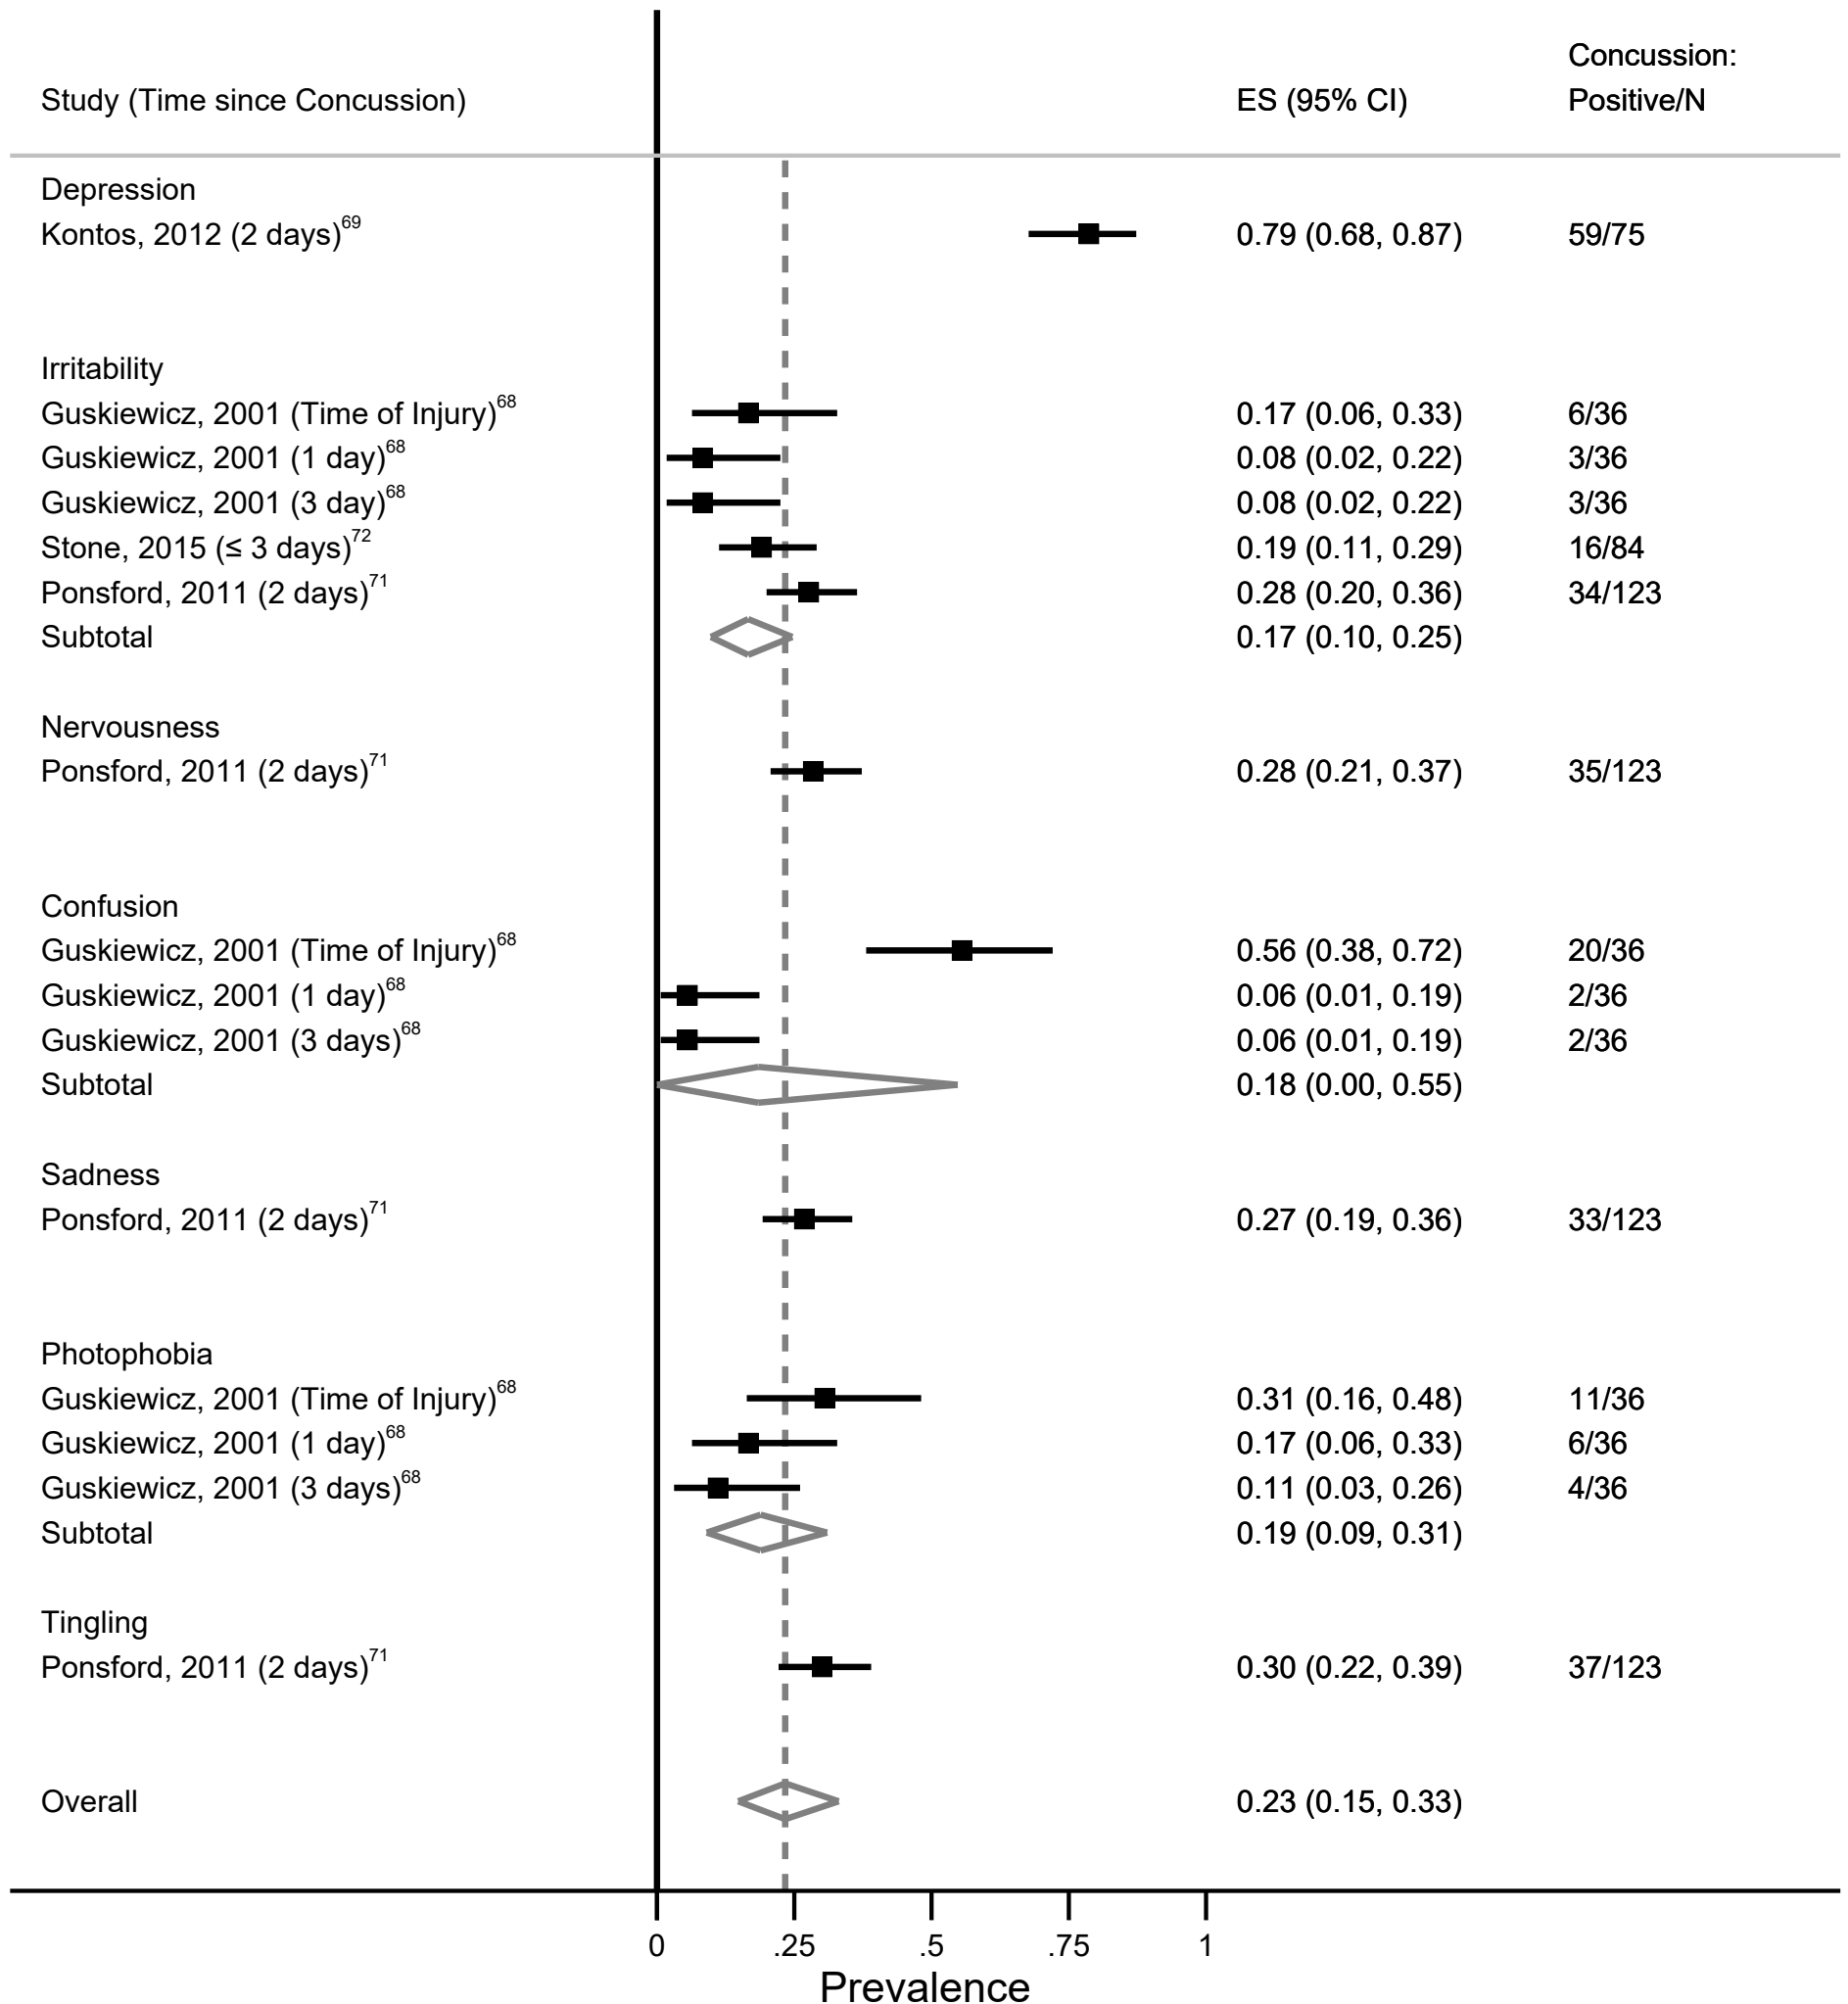

# Prevalence (Sleep Disturbance) in Pediatric Concussion Patients

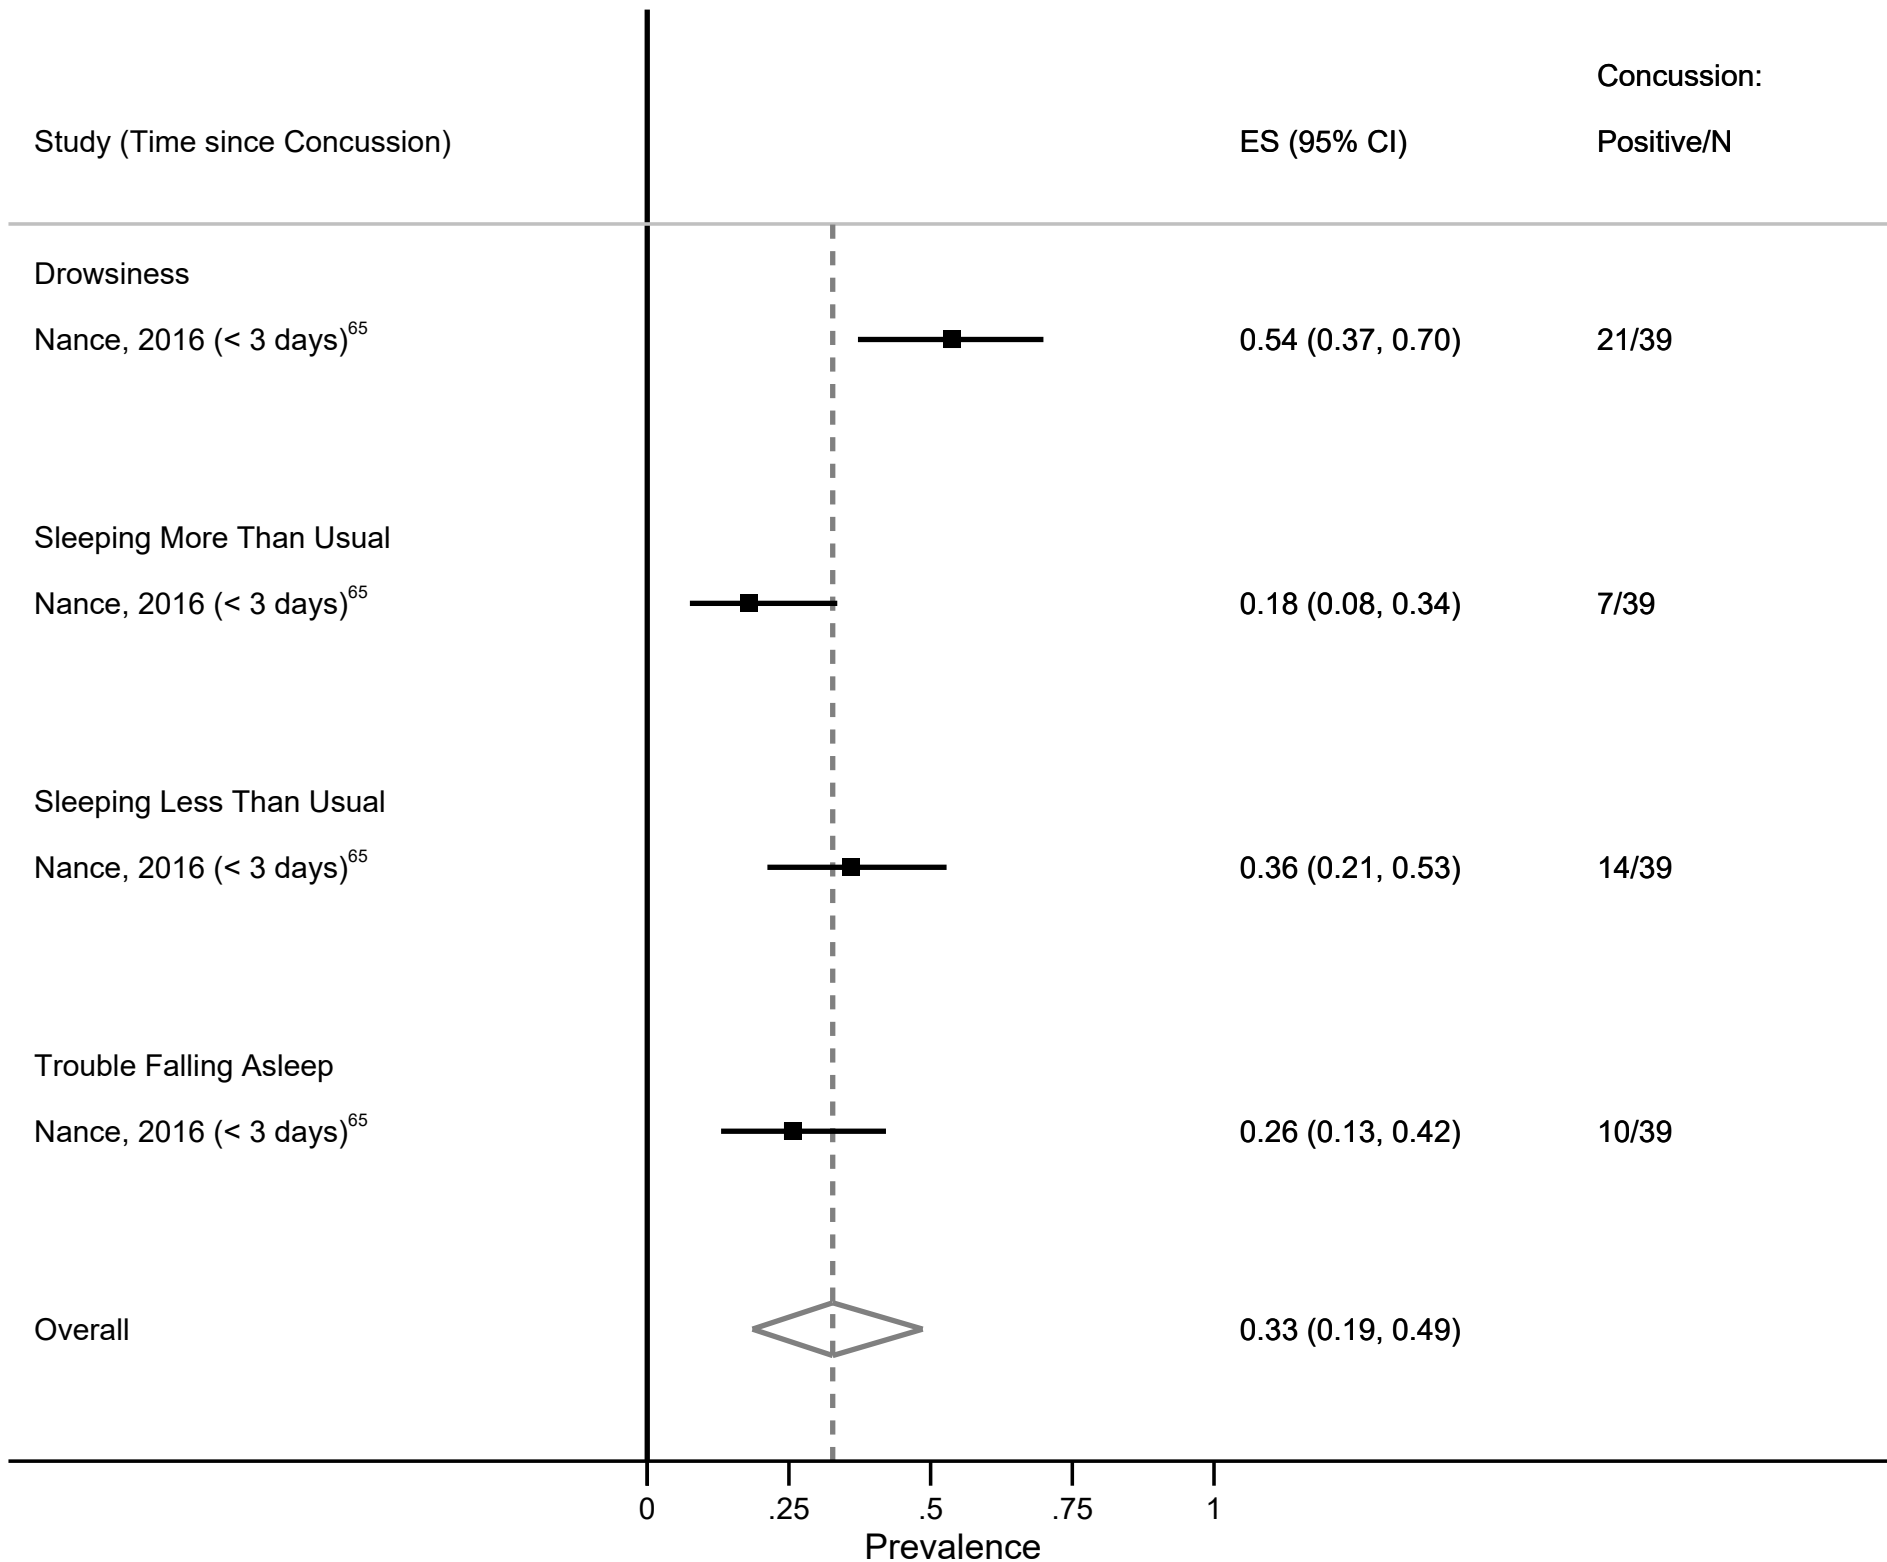

# Prevalence (Sleep Disturbance) in Adult Concussion Patients

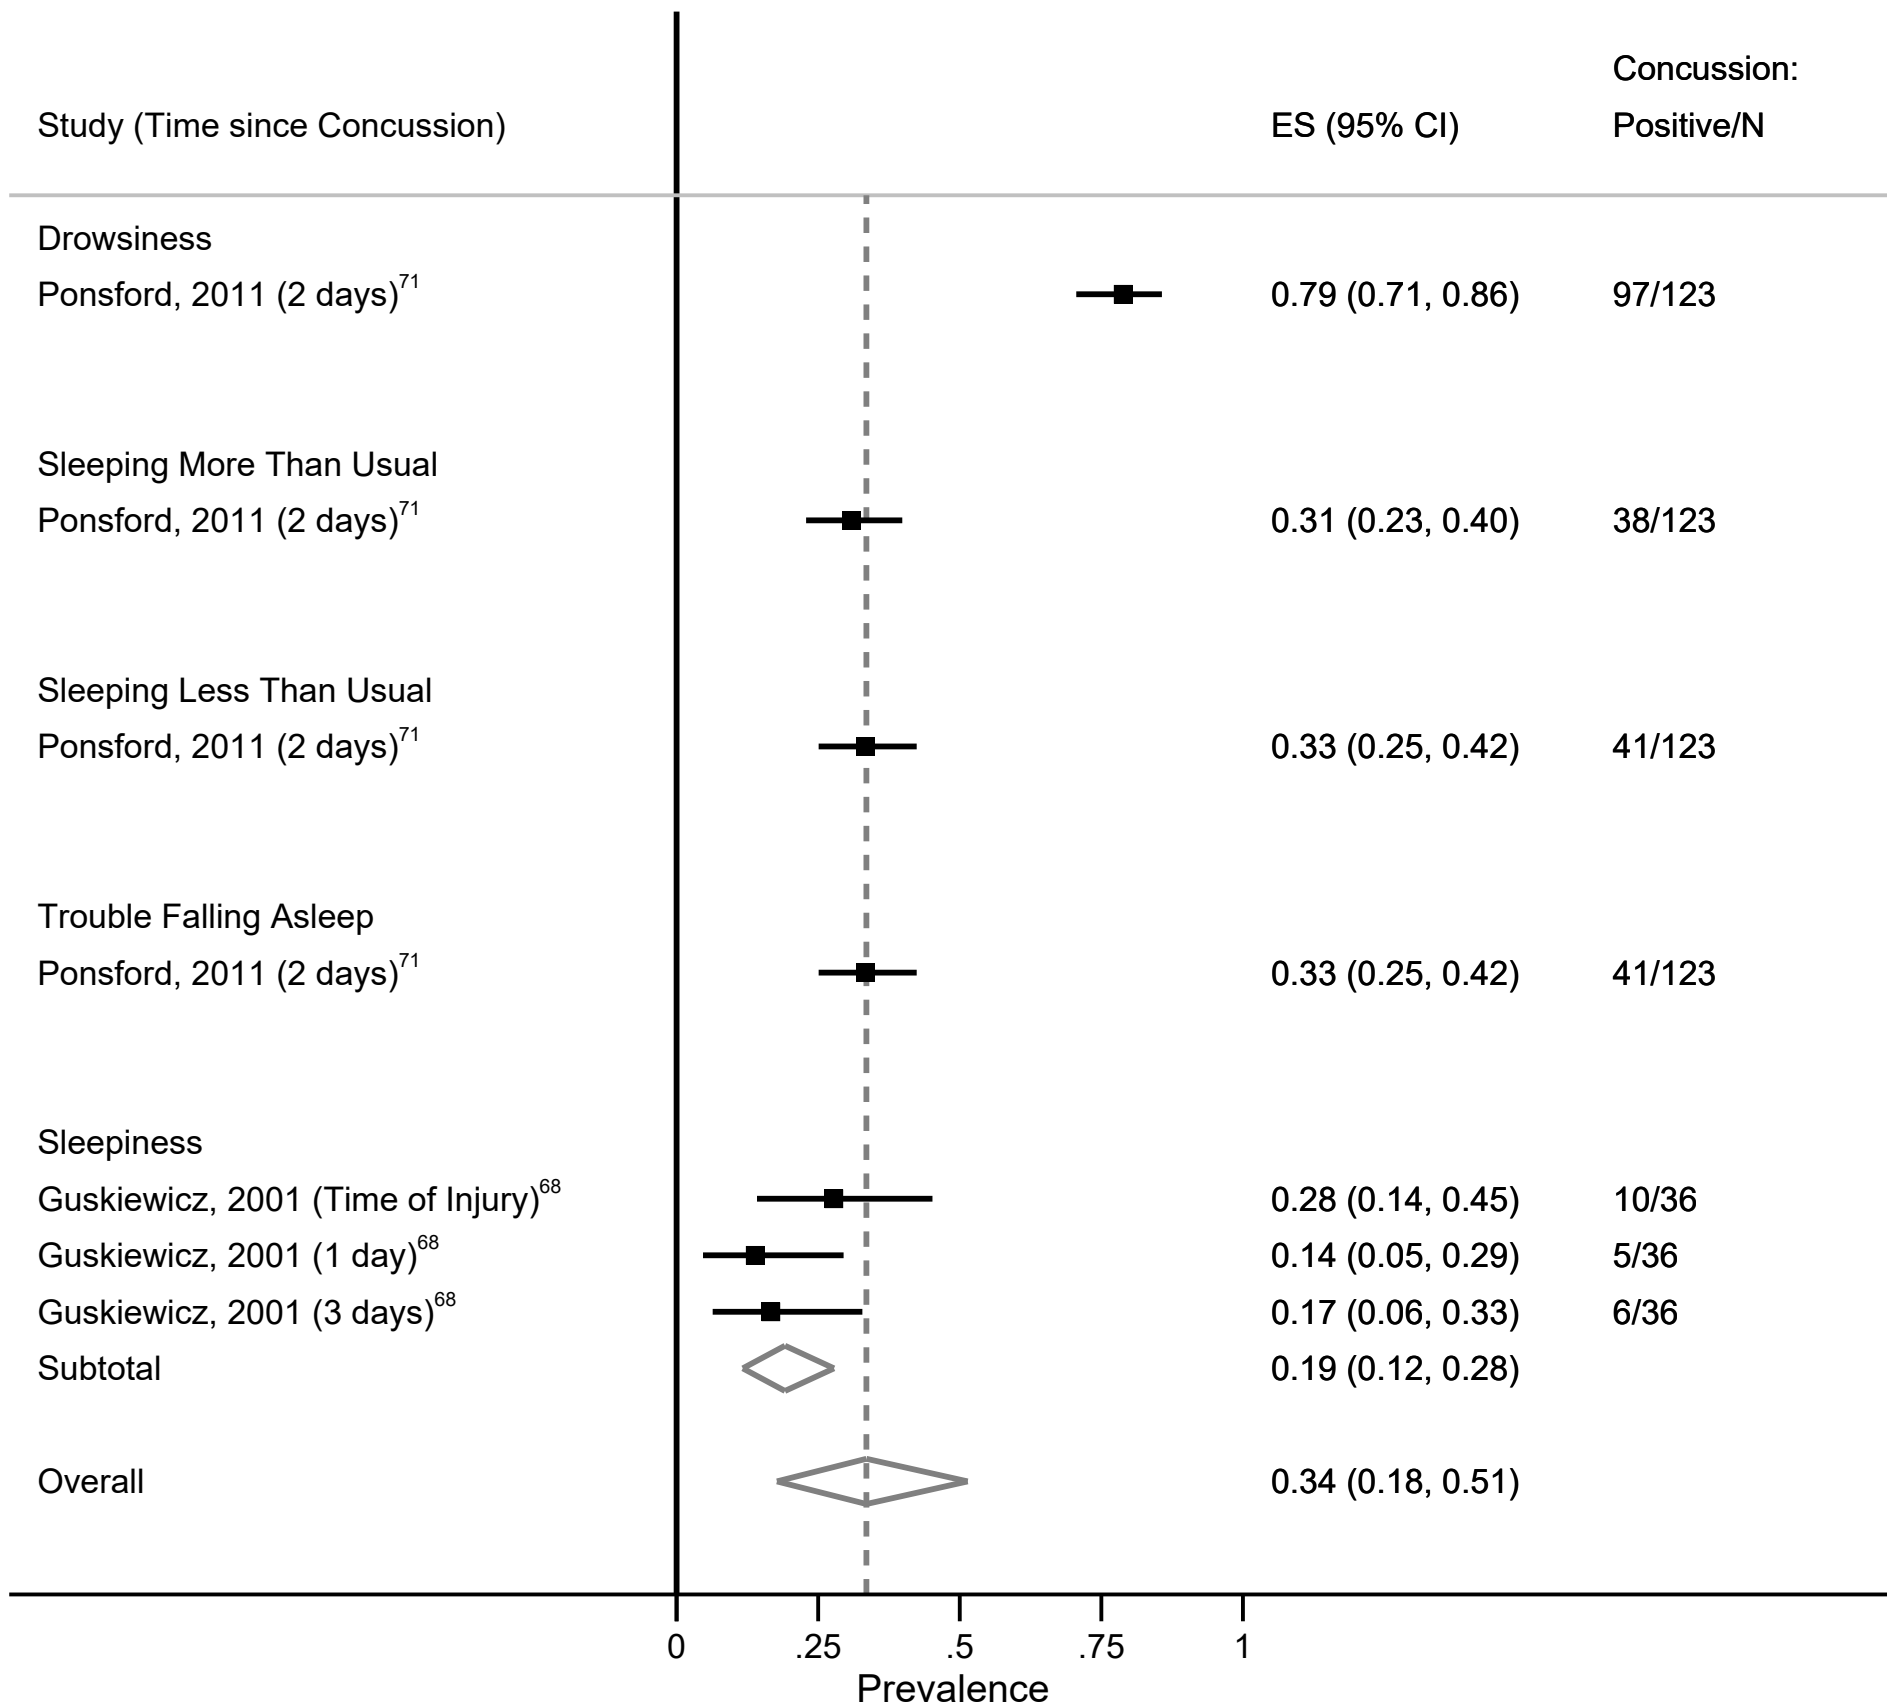

# Prevalence Ratio (Cognitive) in Pediatric Patients

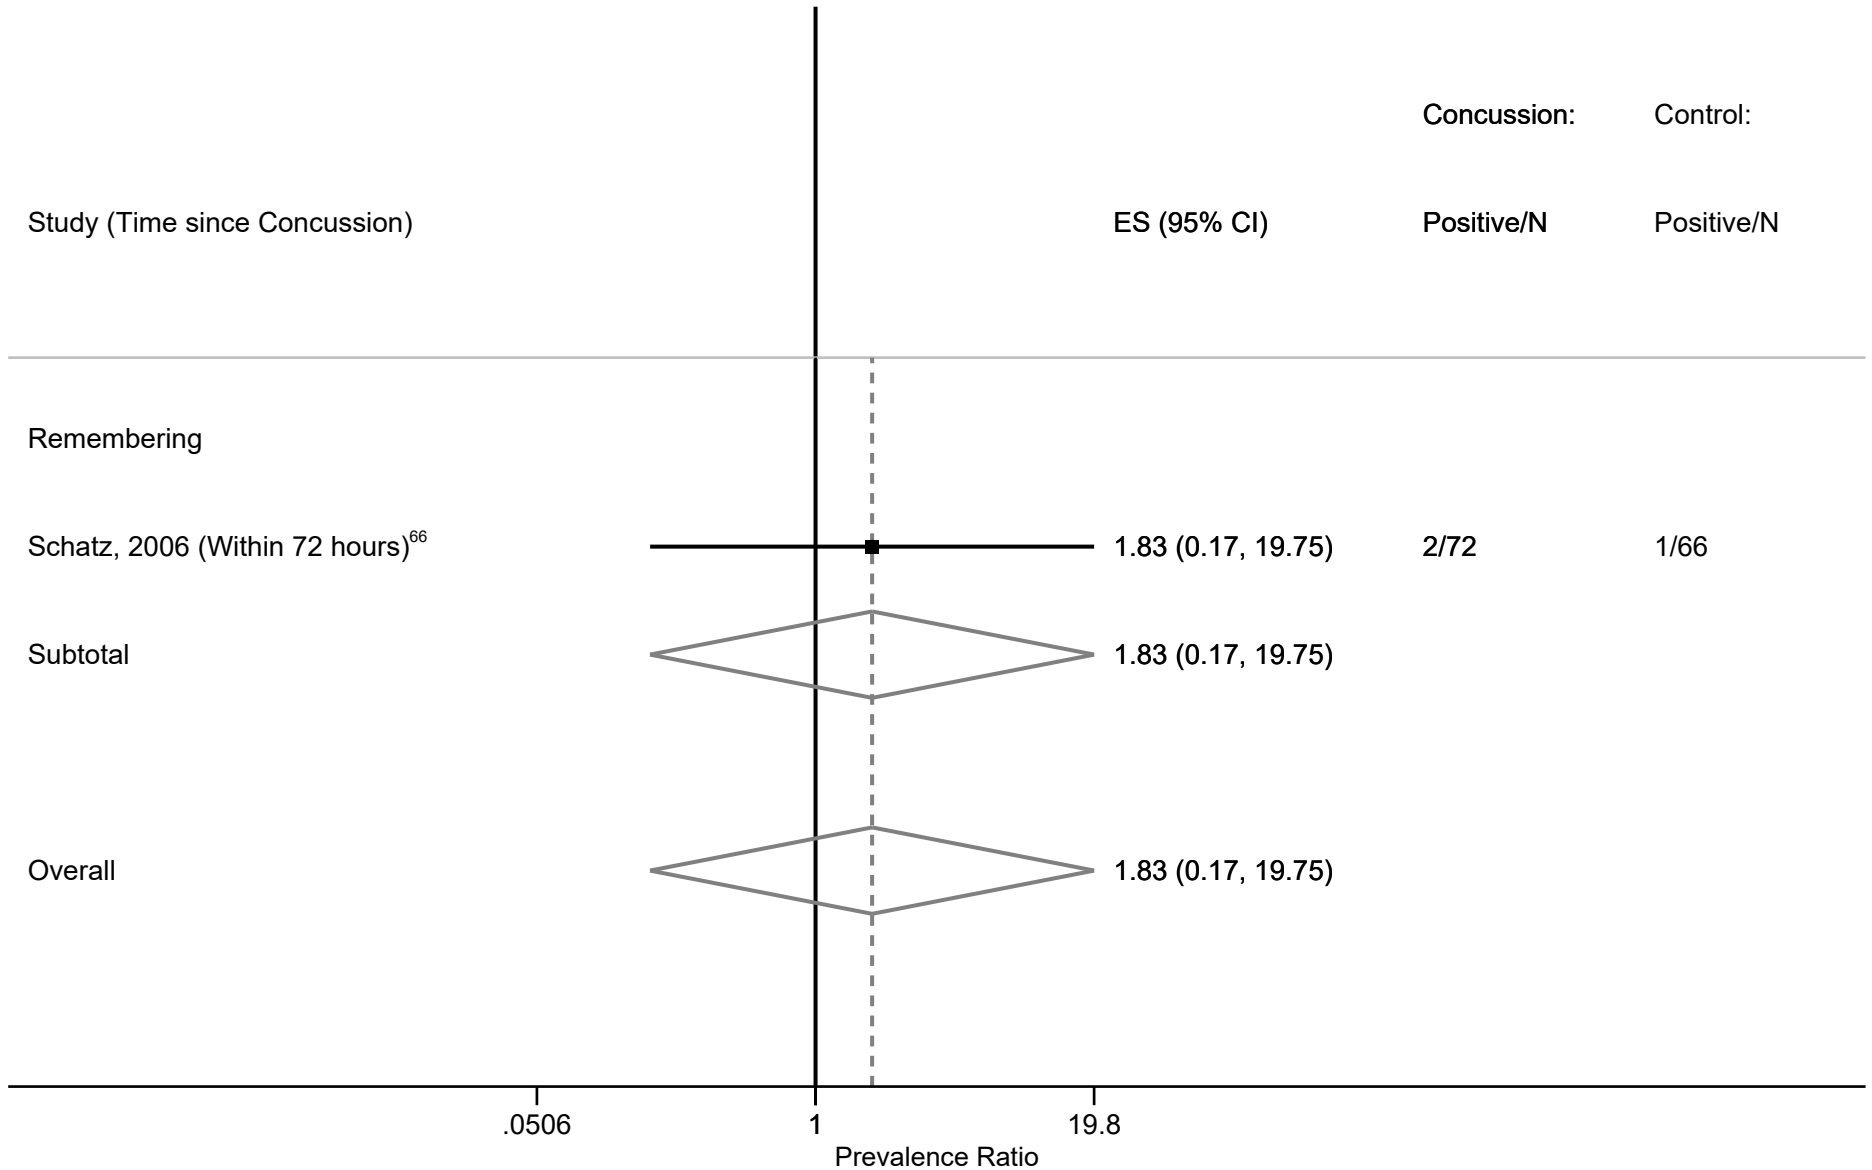

# Prevalence Ratio (Cognitive) in Adult Patients

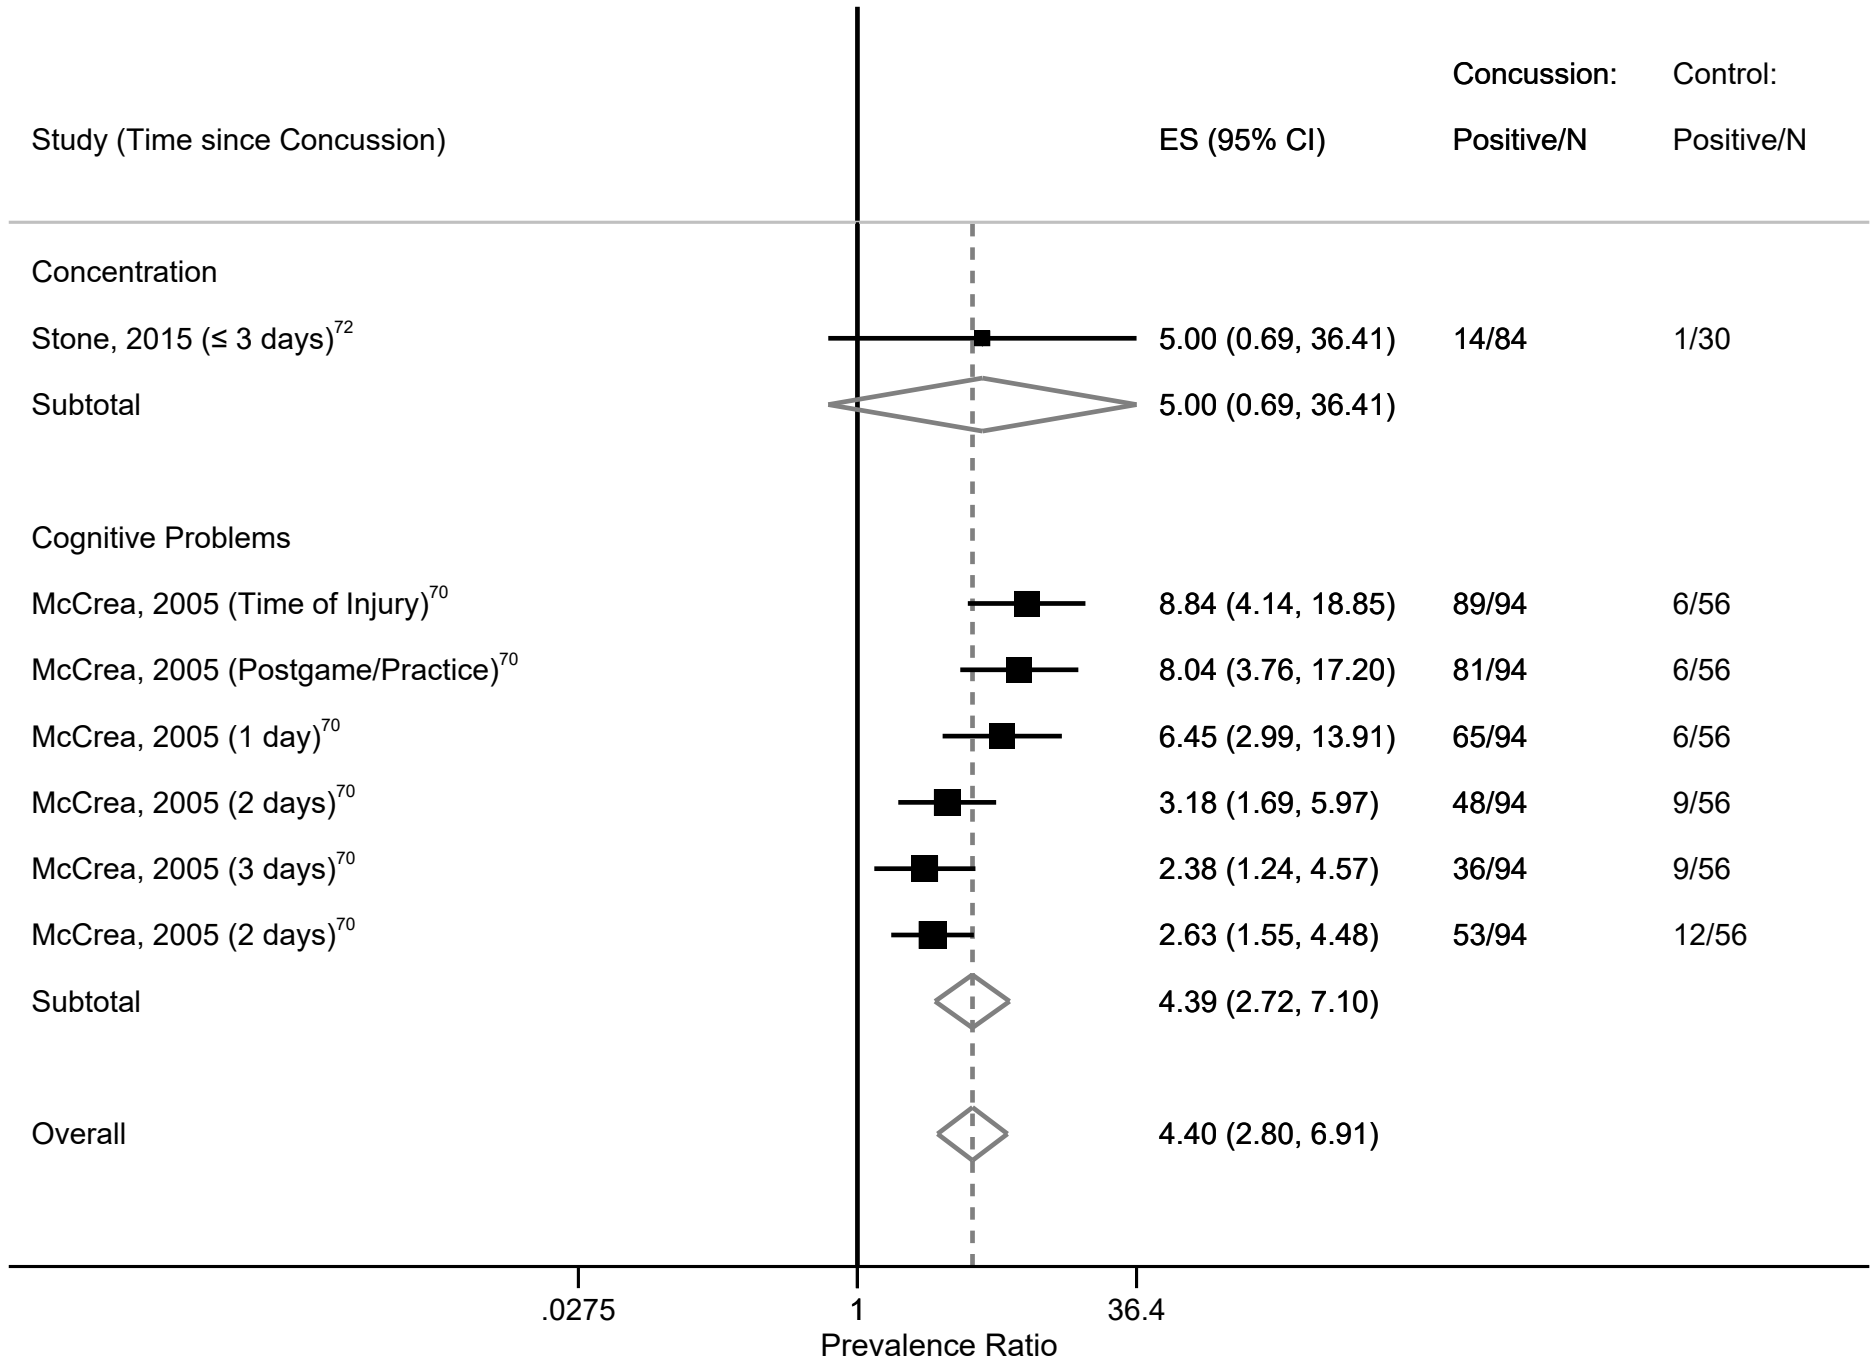

# Prevalence Ratio (Ocular-Motor) in Adult Patients

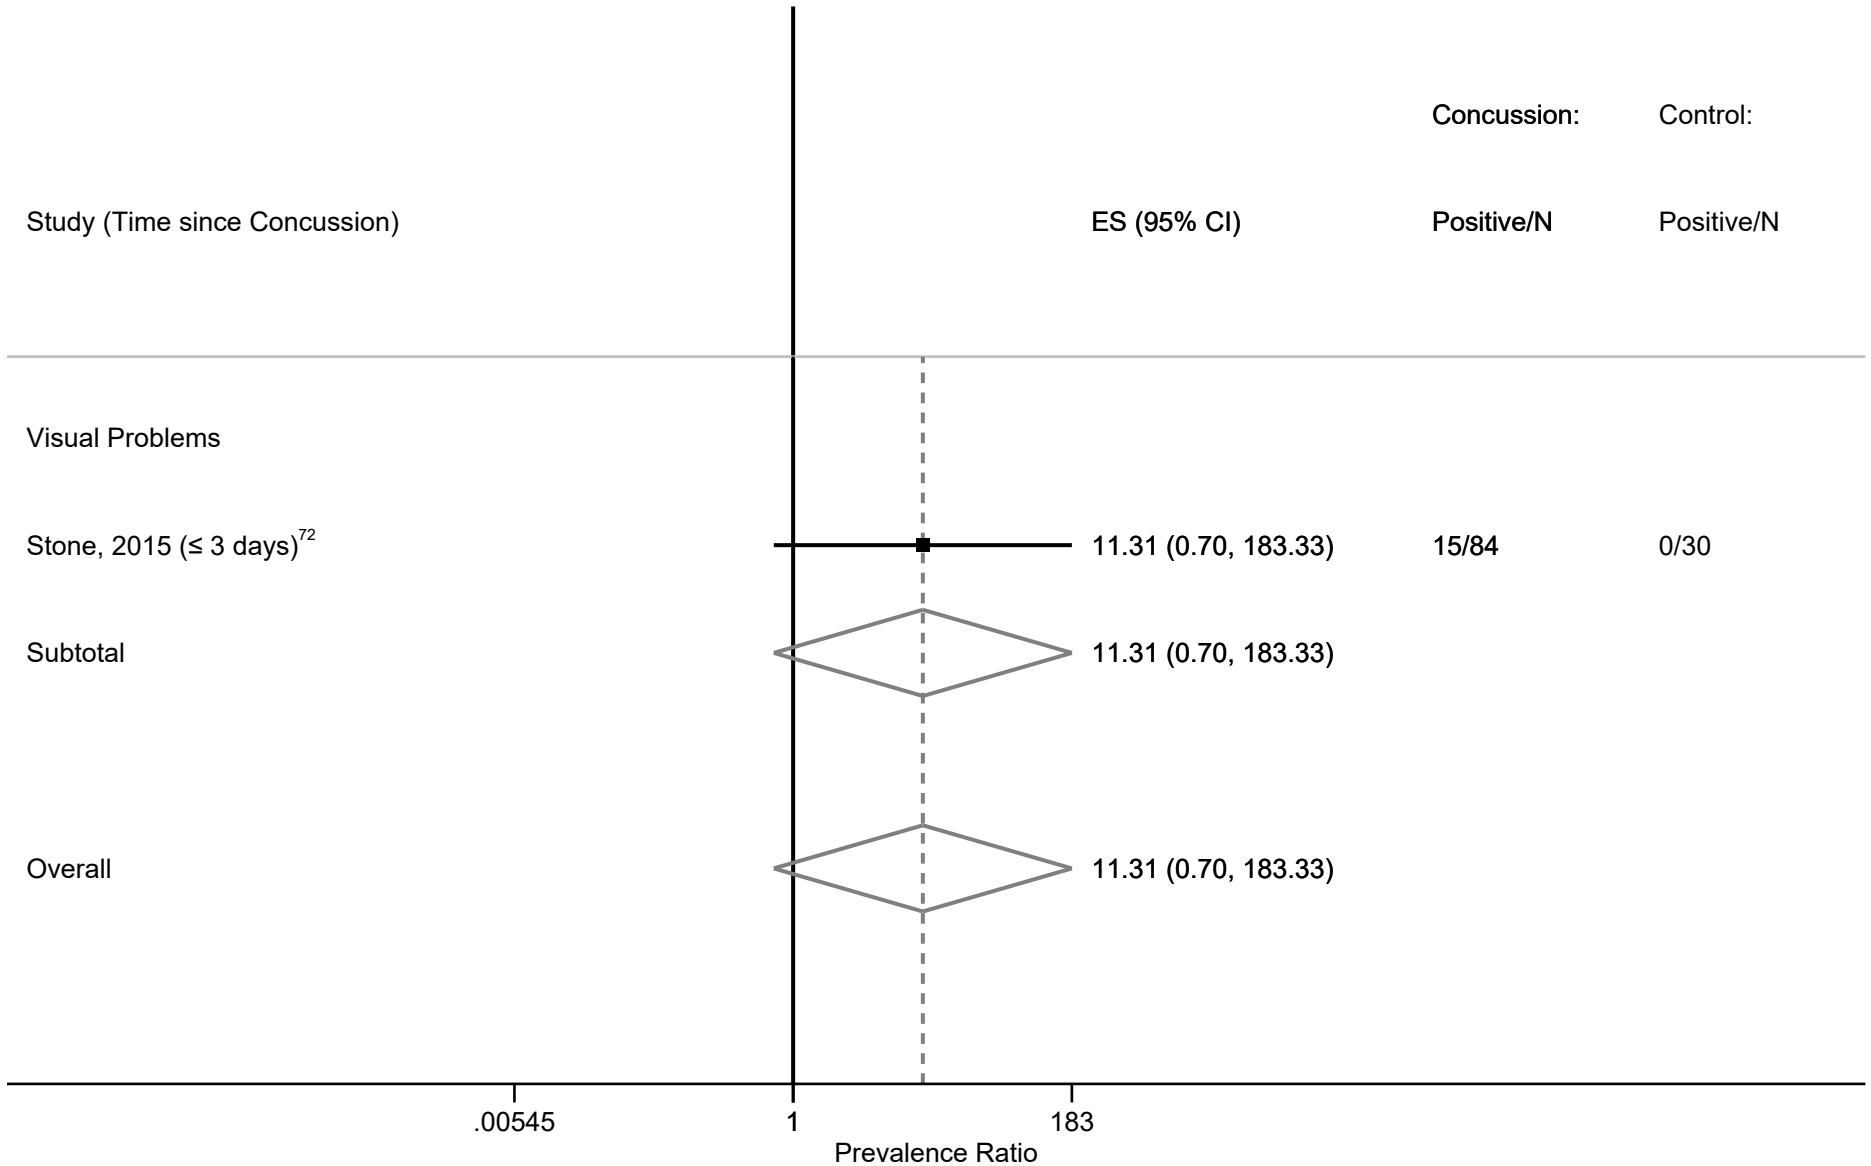

# Prevalence Ratio (Headache-Migraine) in Adult Patients

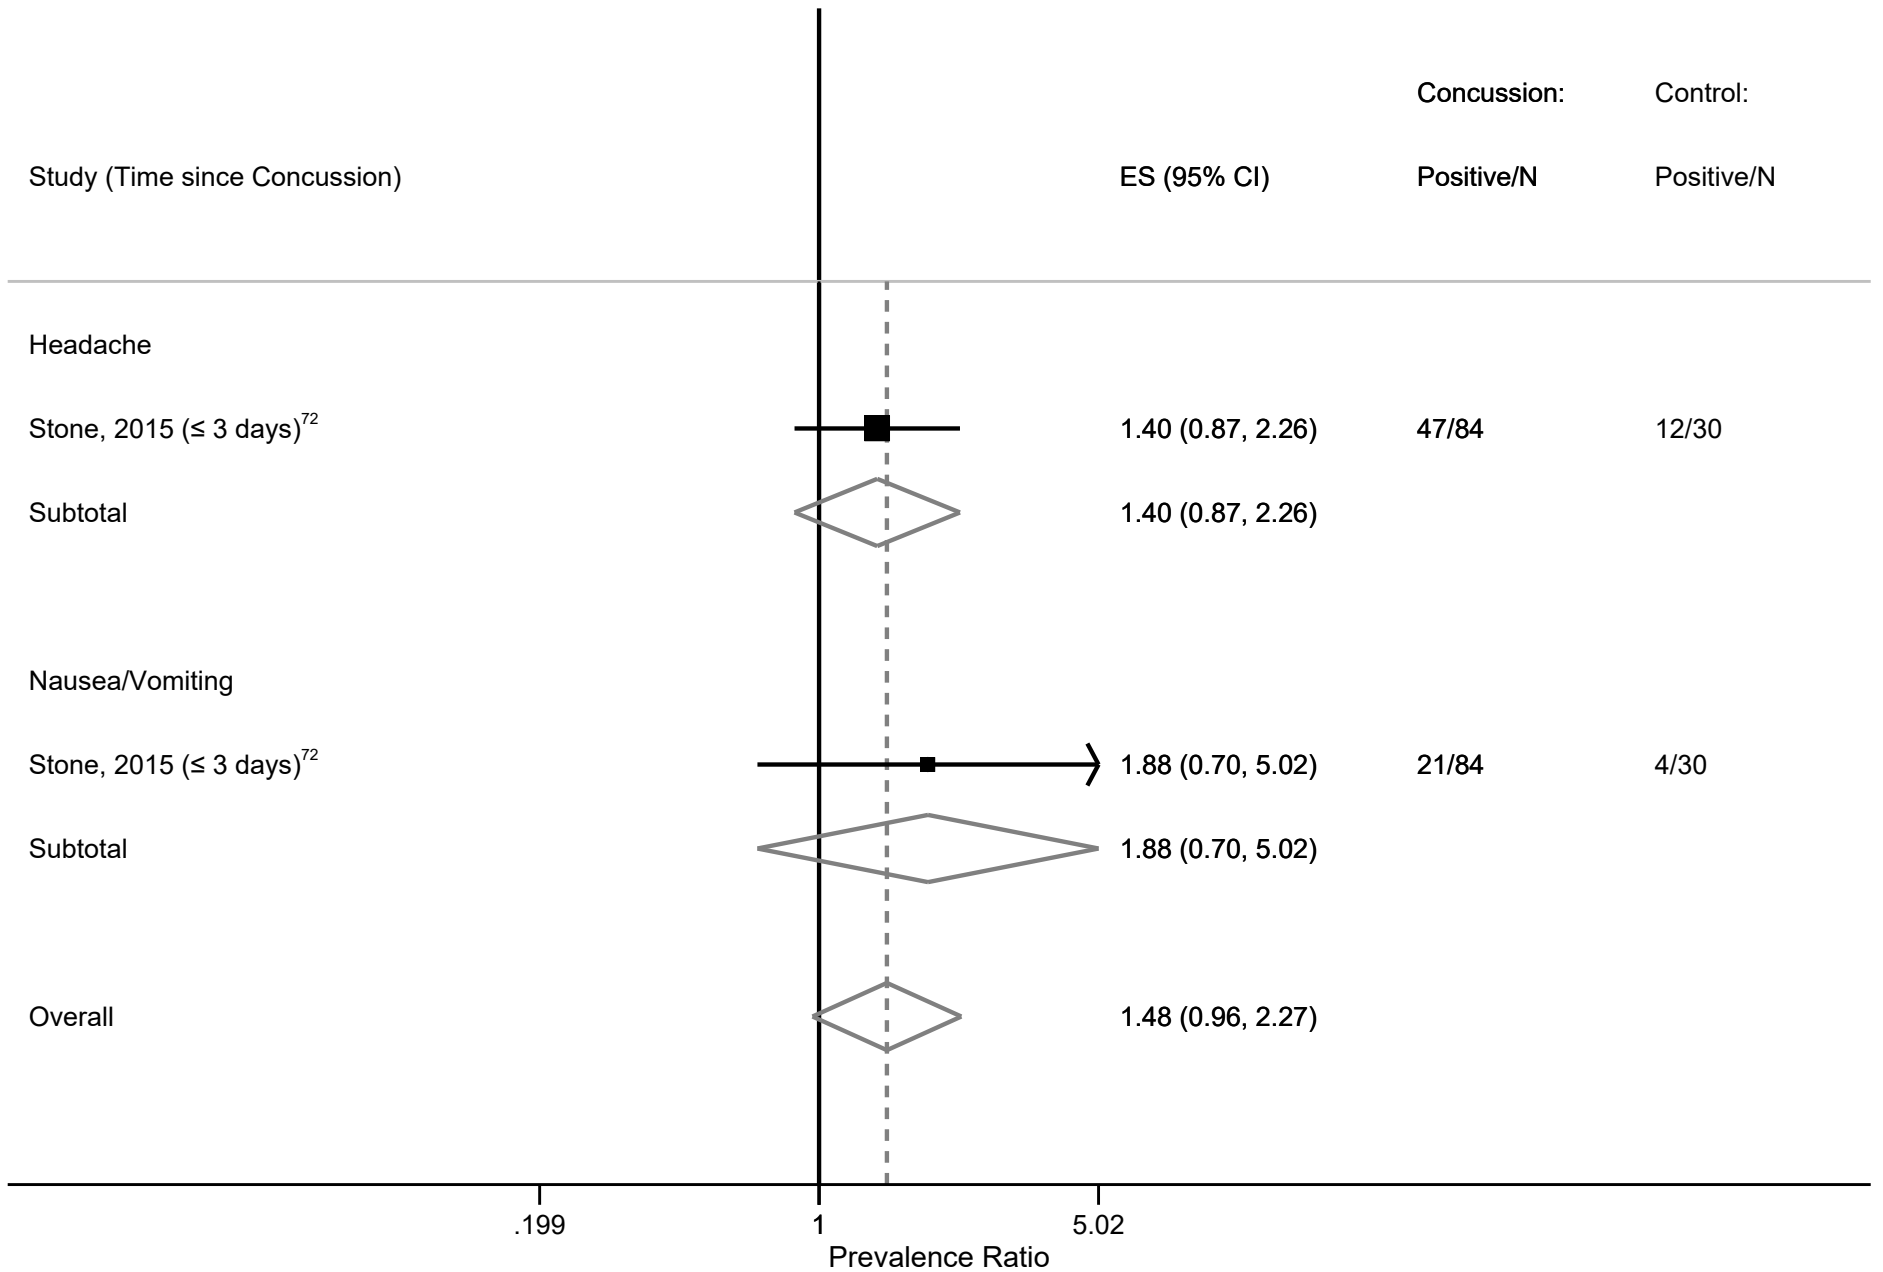



# Prevalence Ratio (Vestibular) in Adult Patients

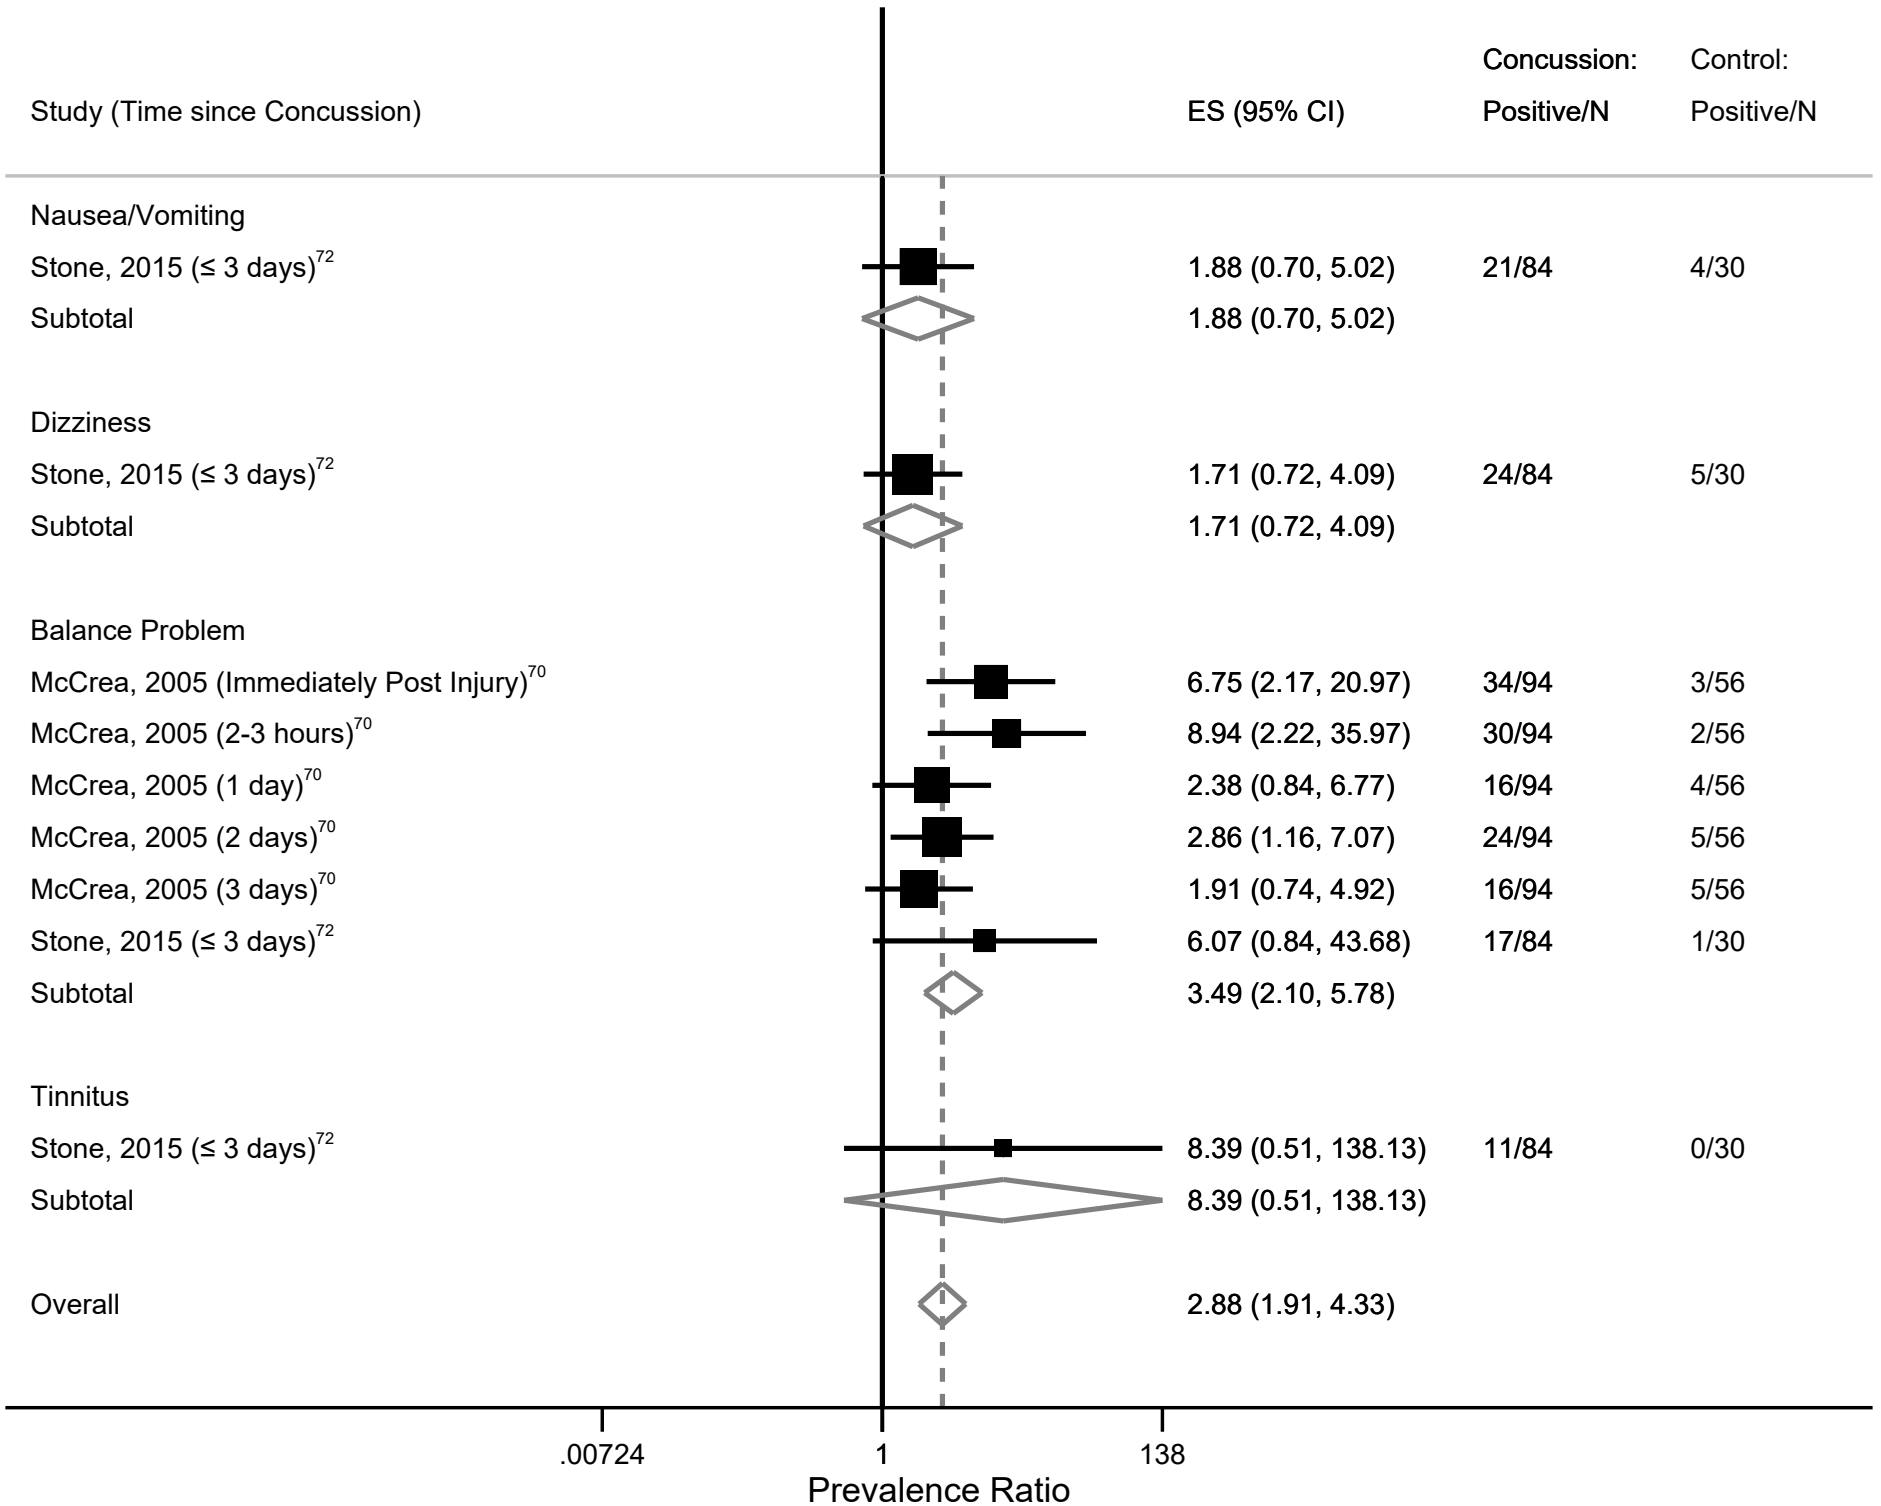

# Prevalence Ratio (Anxiety/Mood) in Adult Patients

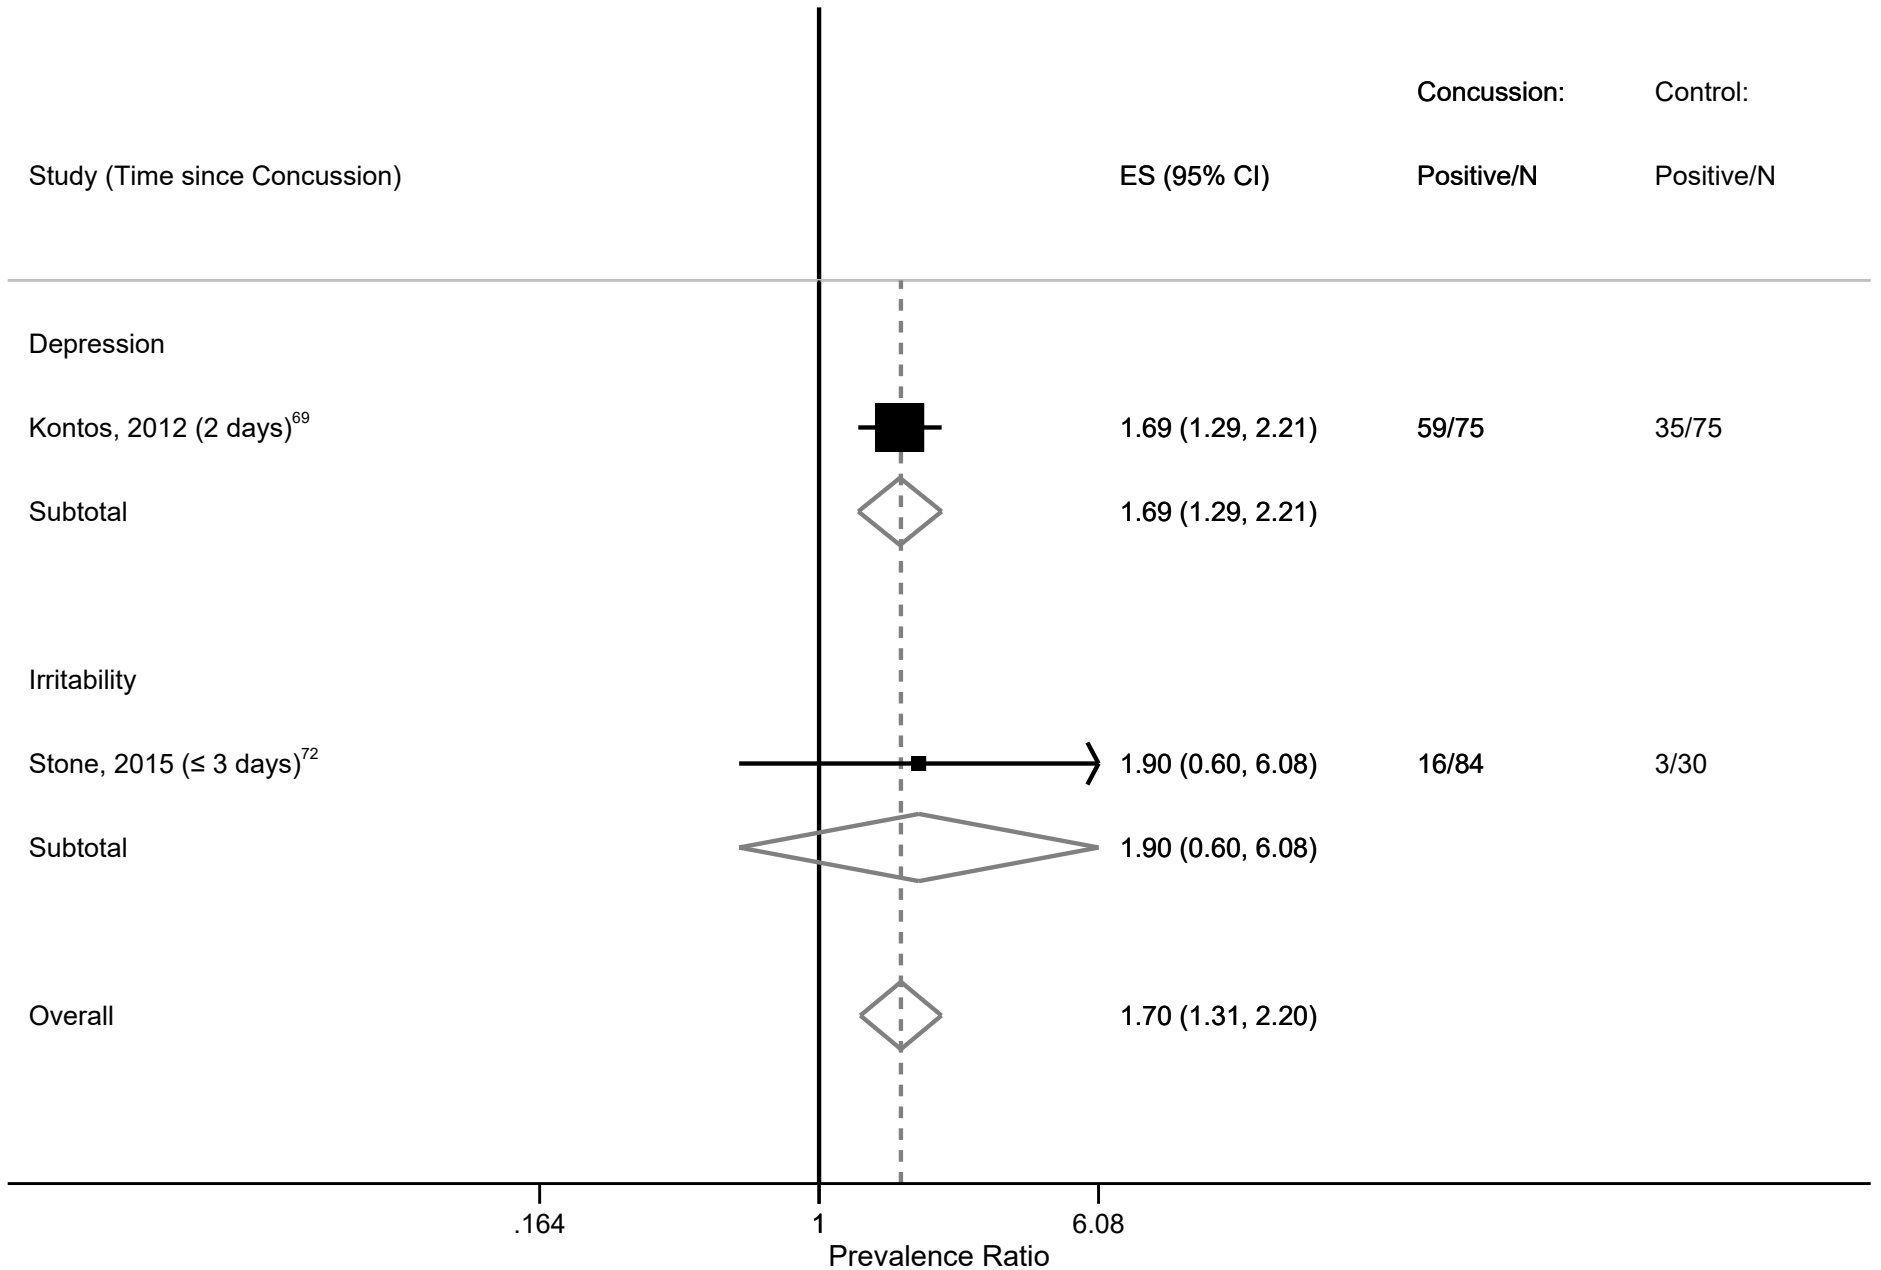

# Standardized Mean Difference (Cognitive) in Pediatric Patients

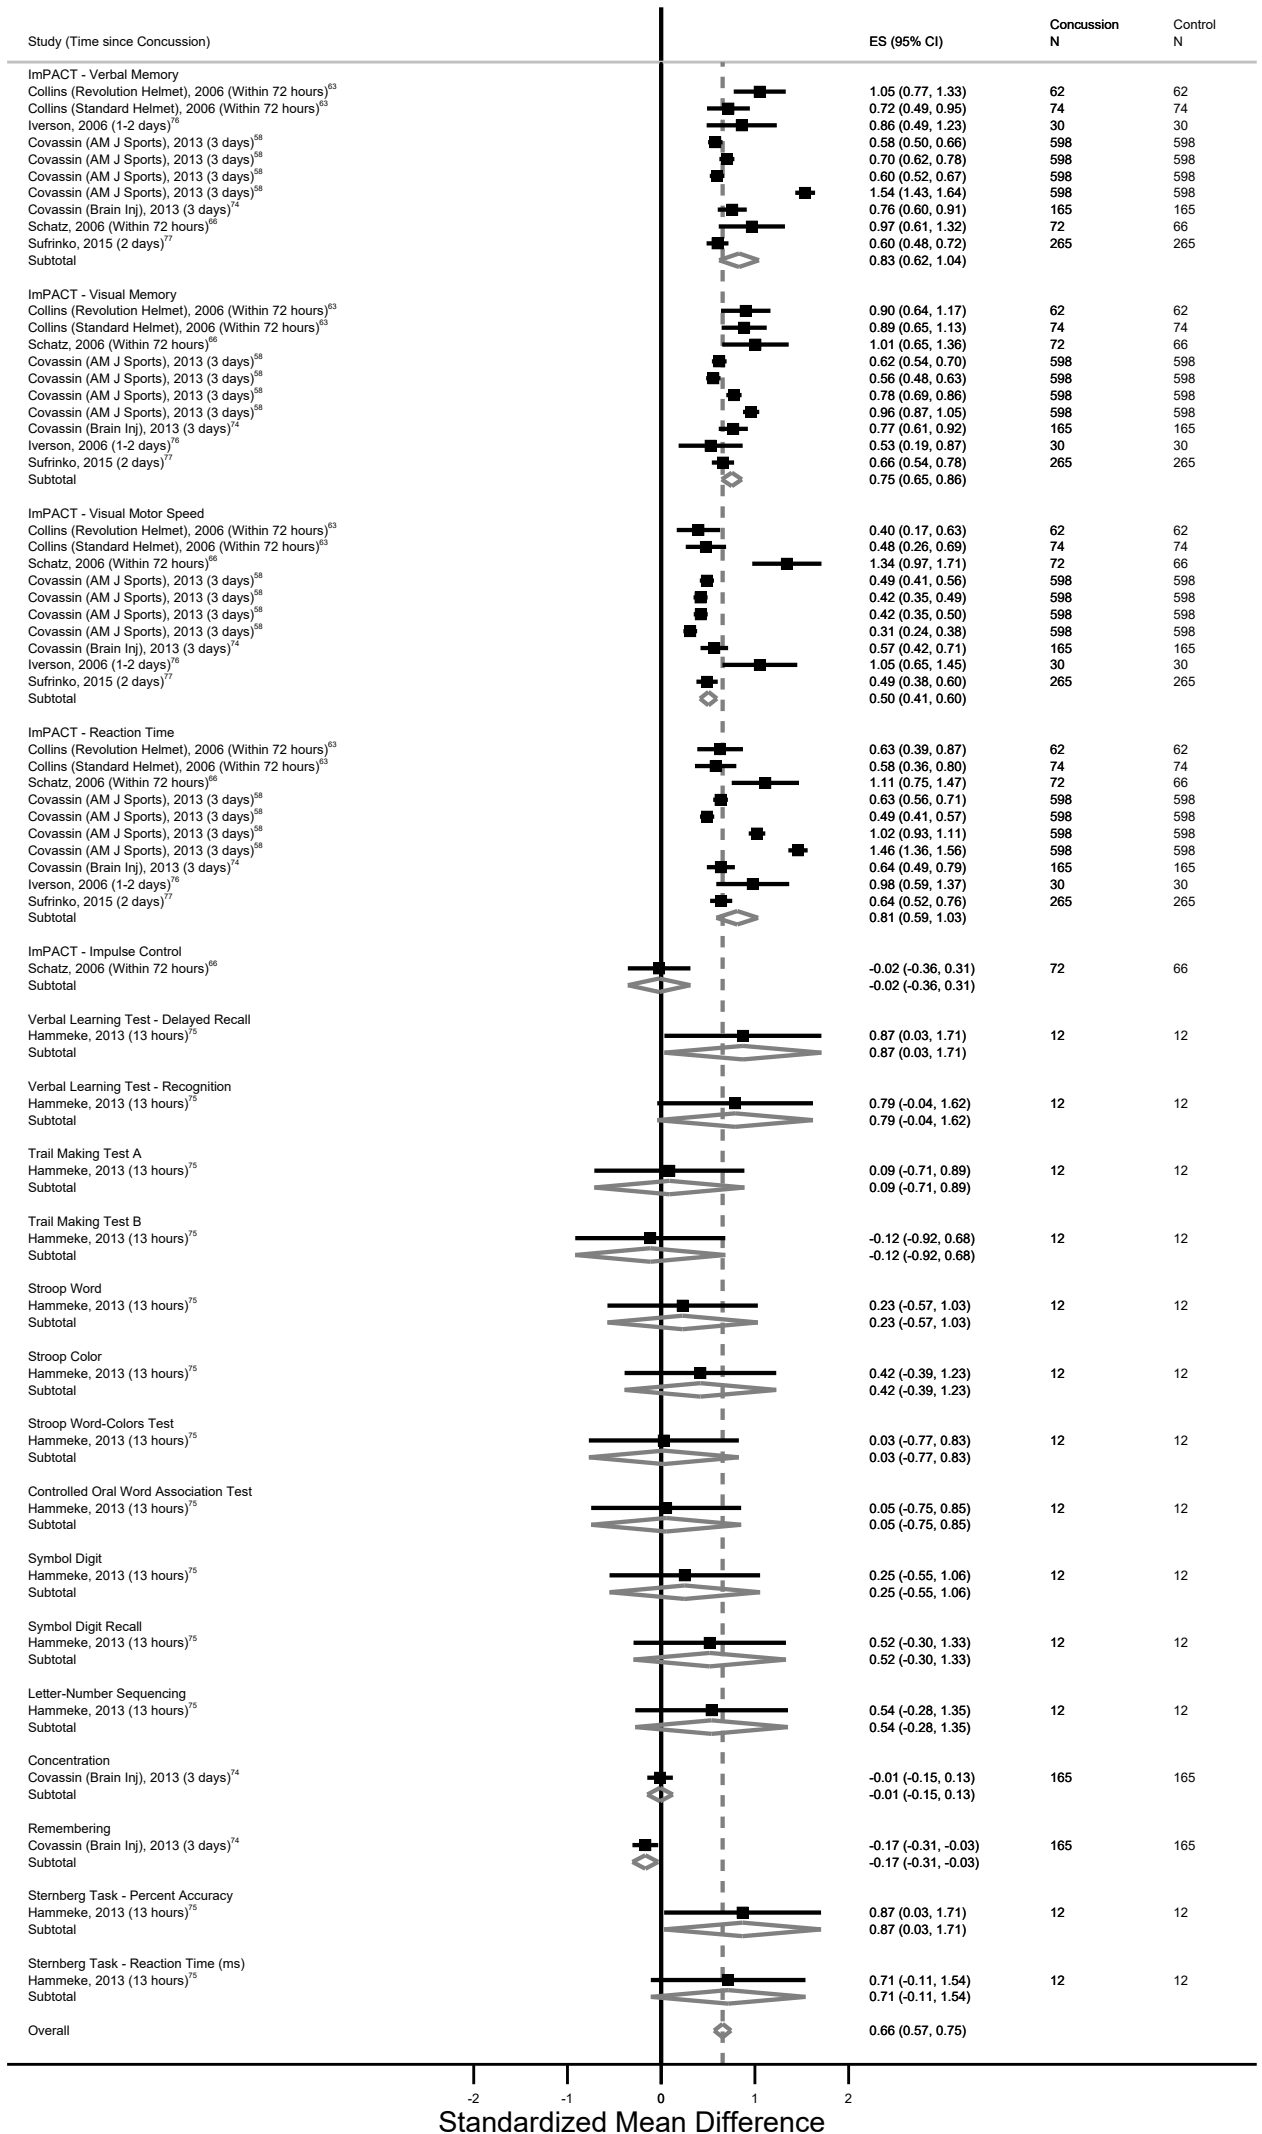

Standardized Mean Difference

# Standardized Mean Difference (Cognitive) in Adult Patients

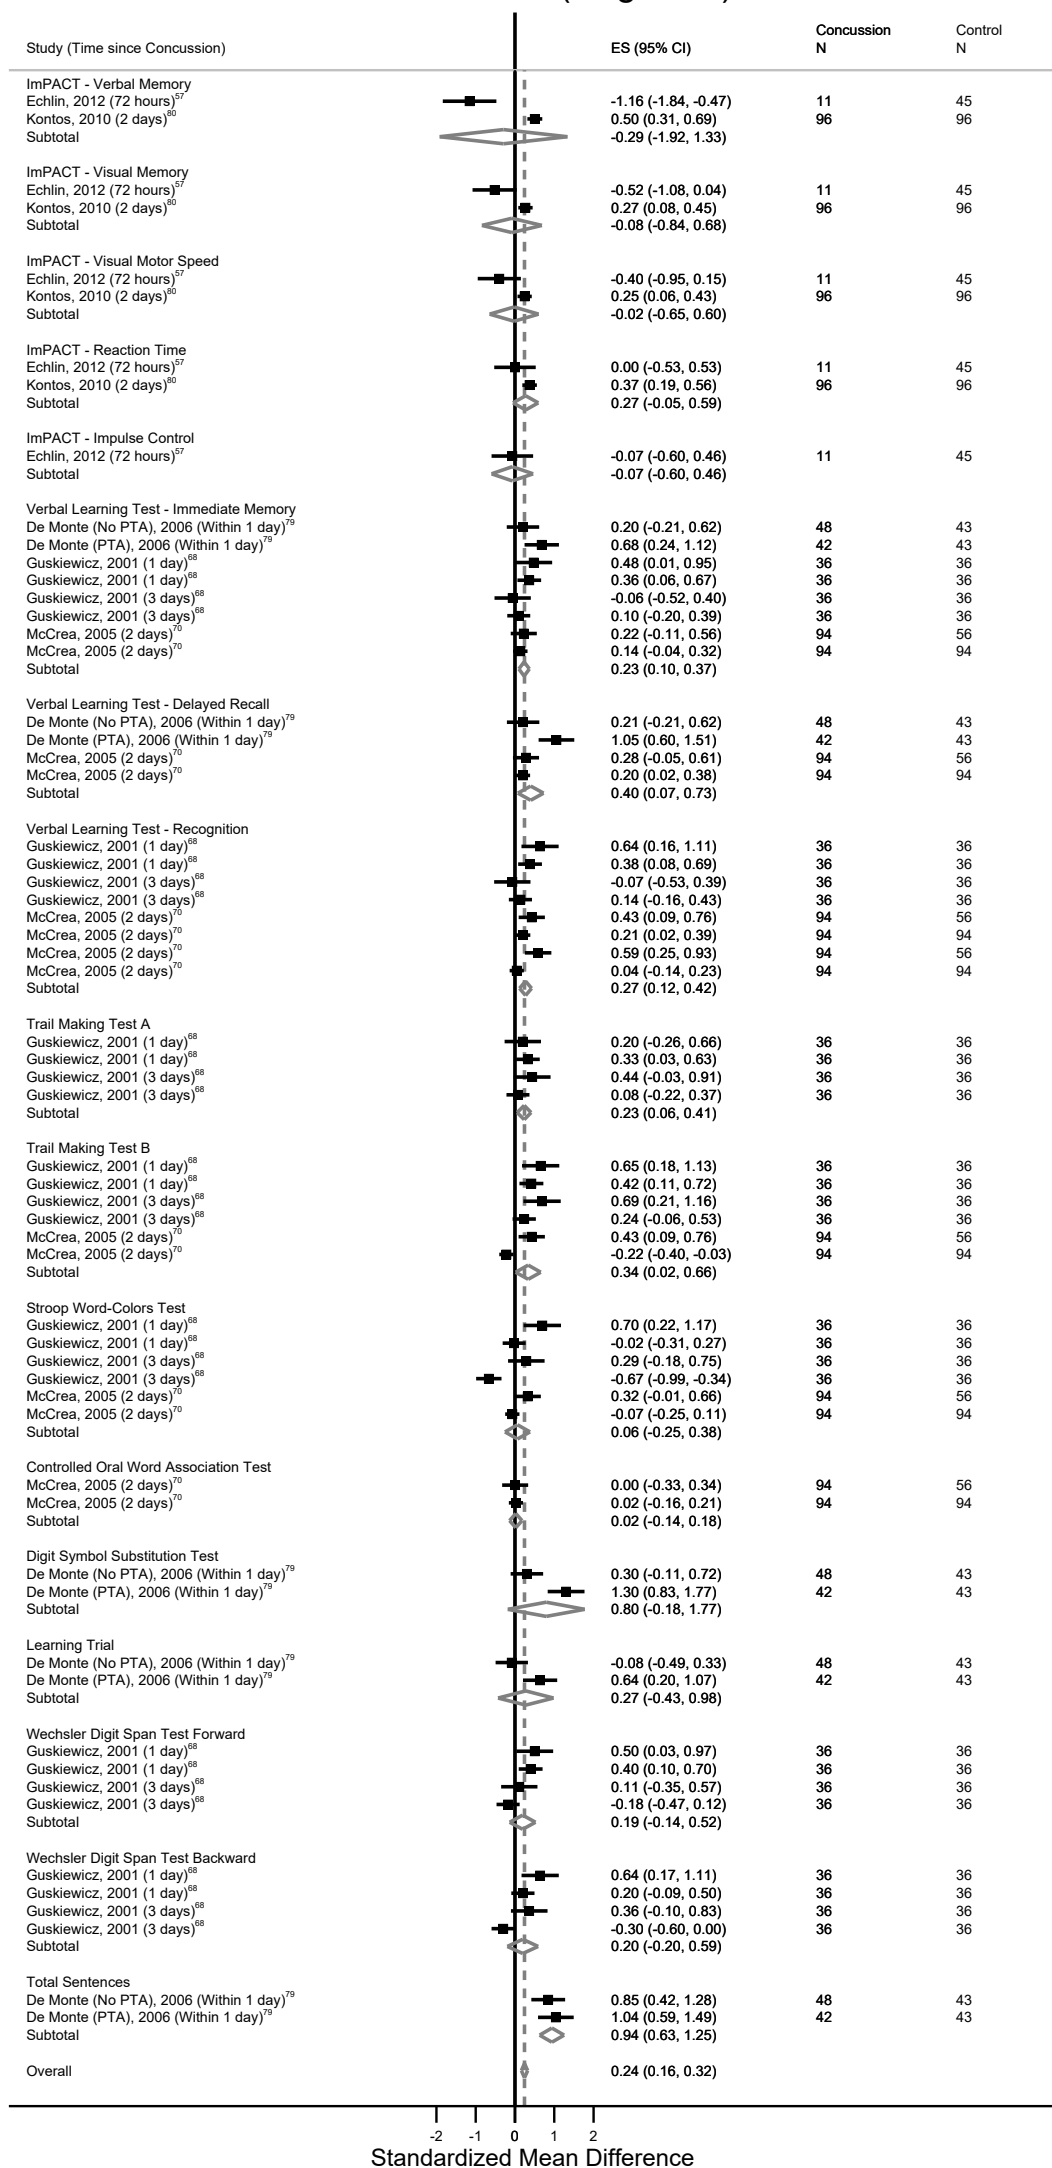

# Standardized Mean Difference (Ocular-Motor) in Pediatric Patients

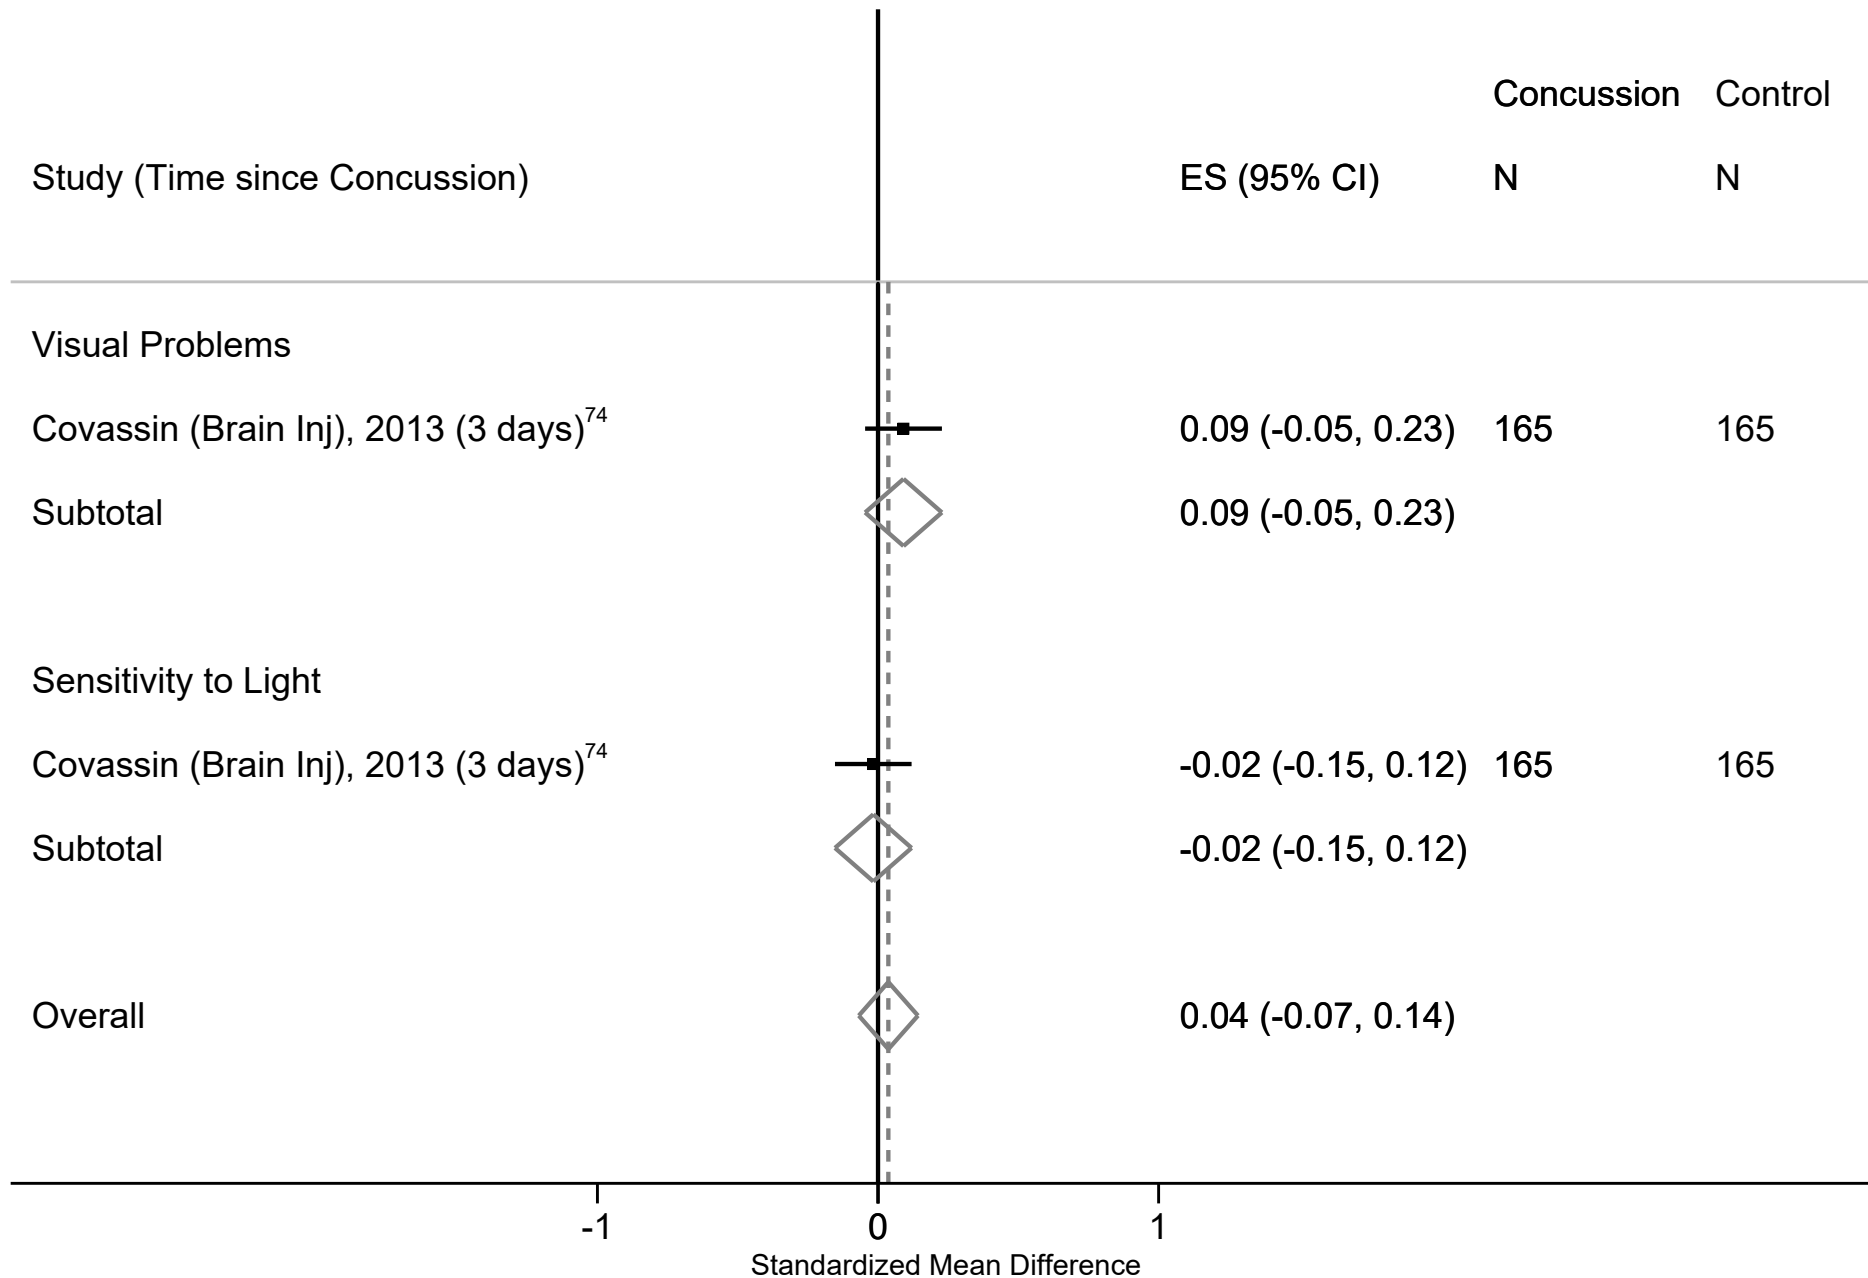

# Standardized Mean Difference (Ocular-Motor) in Adult Patients

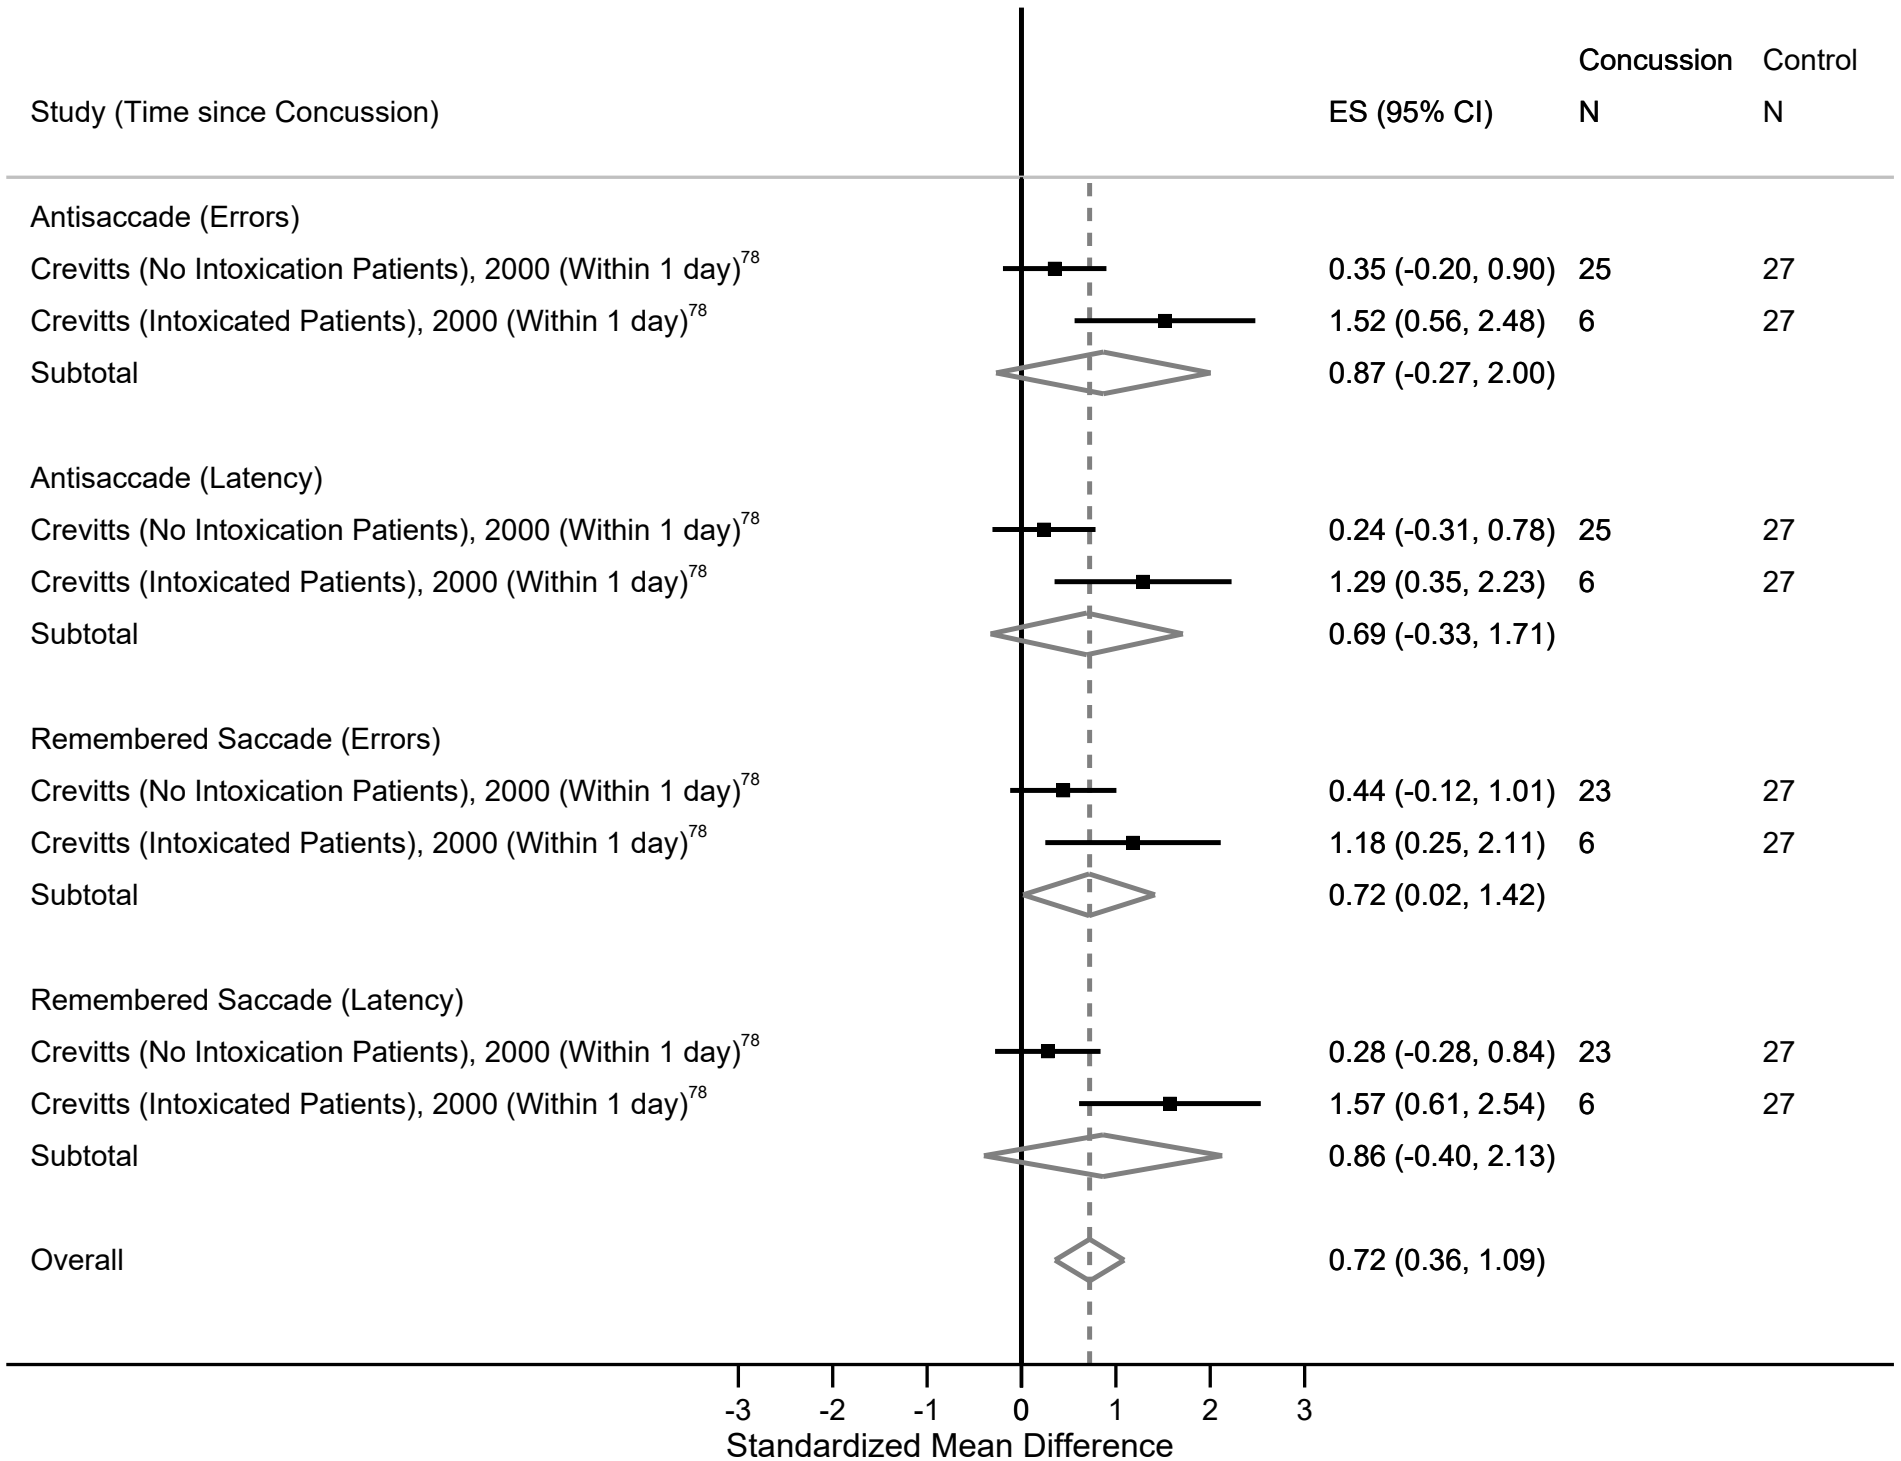

# Standardized Mean Difference (Headache/Migraine) in Pediatric Patients

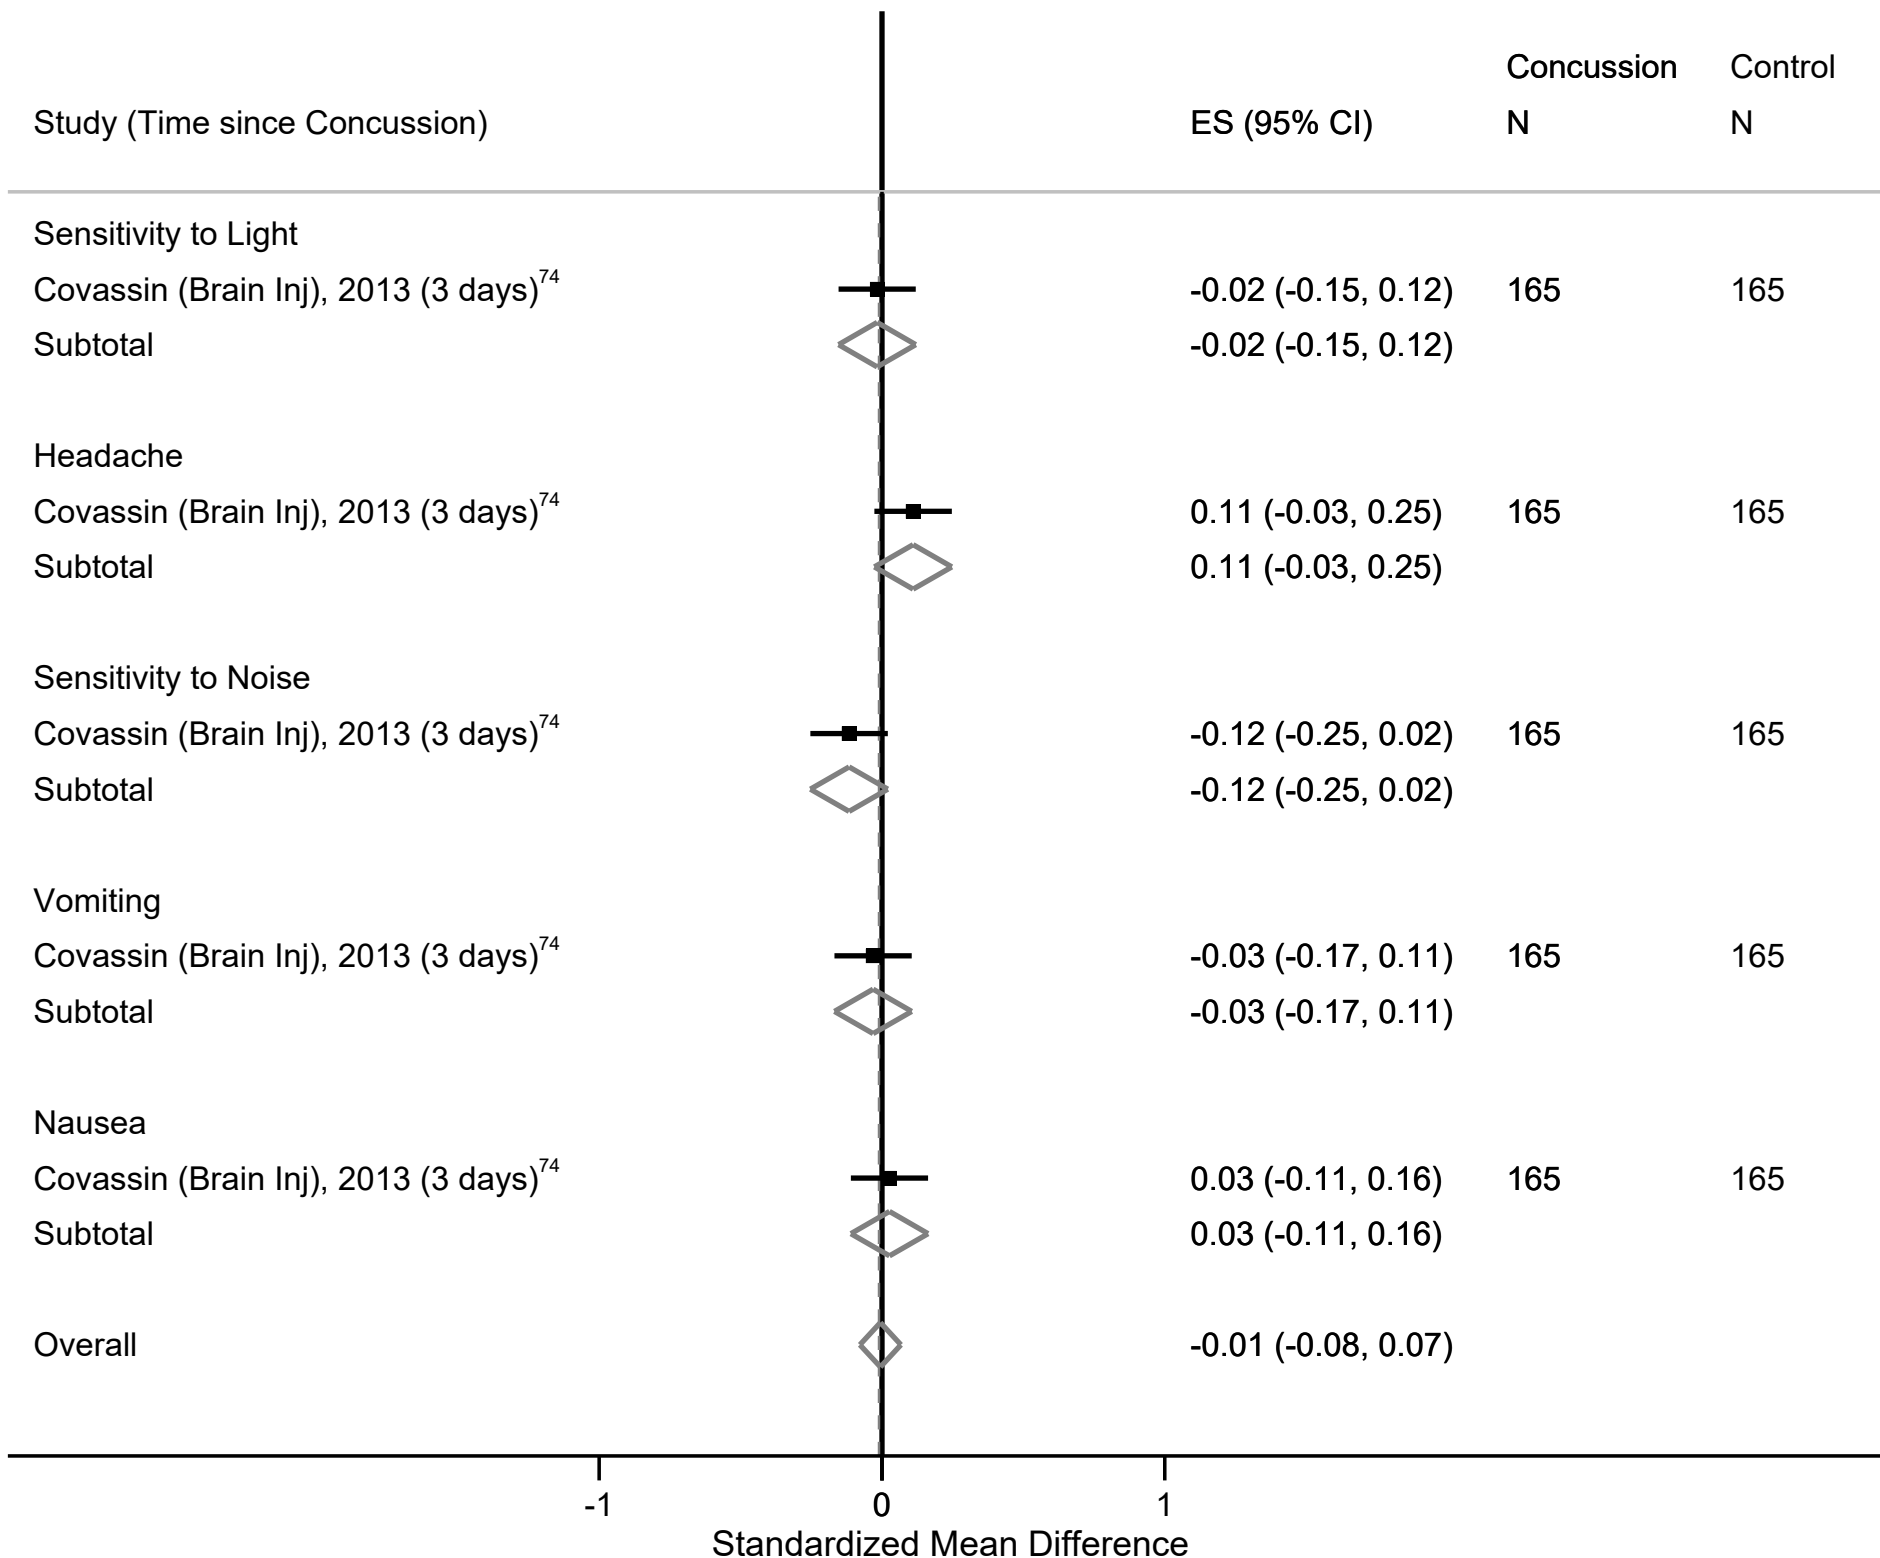

# Standardized Mean Difference (Vestibular) in Pediatric Patients

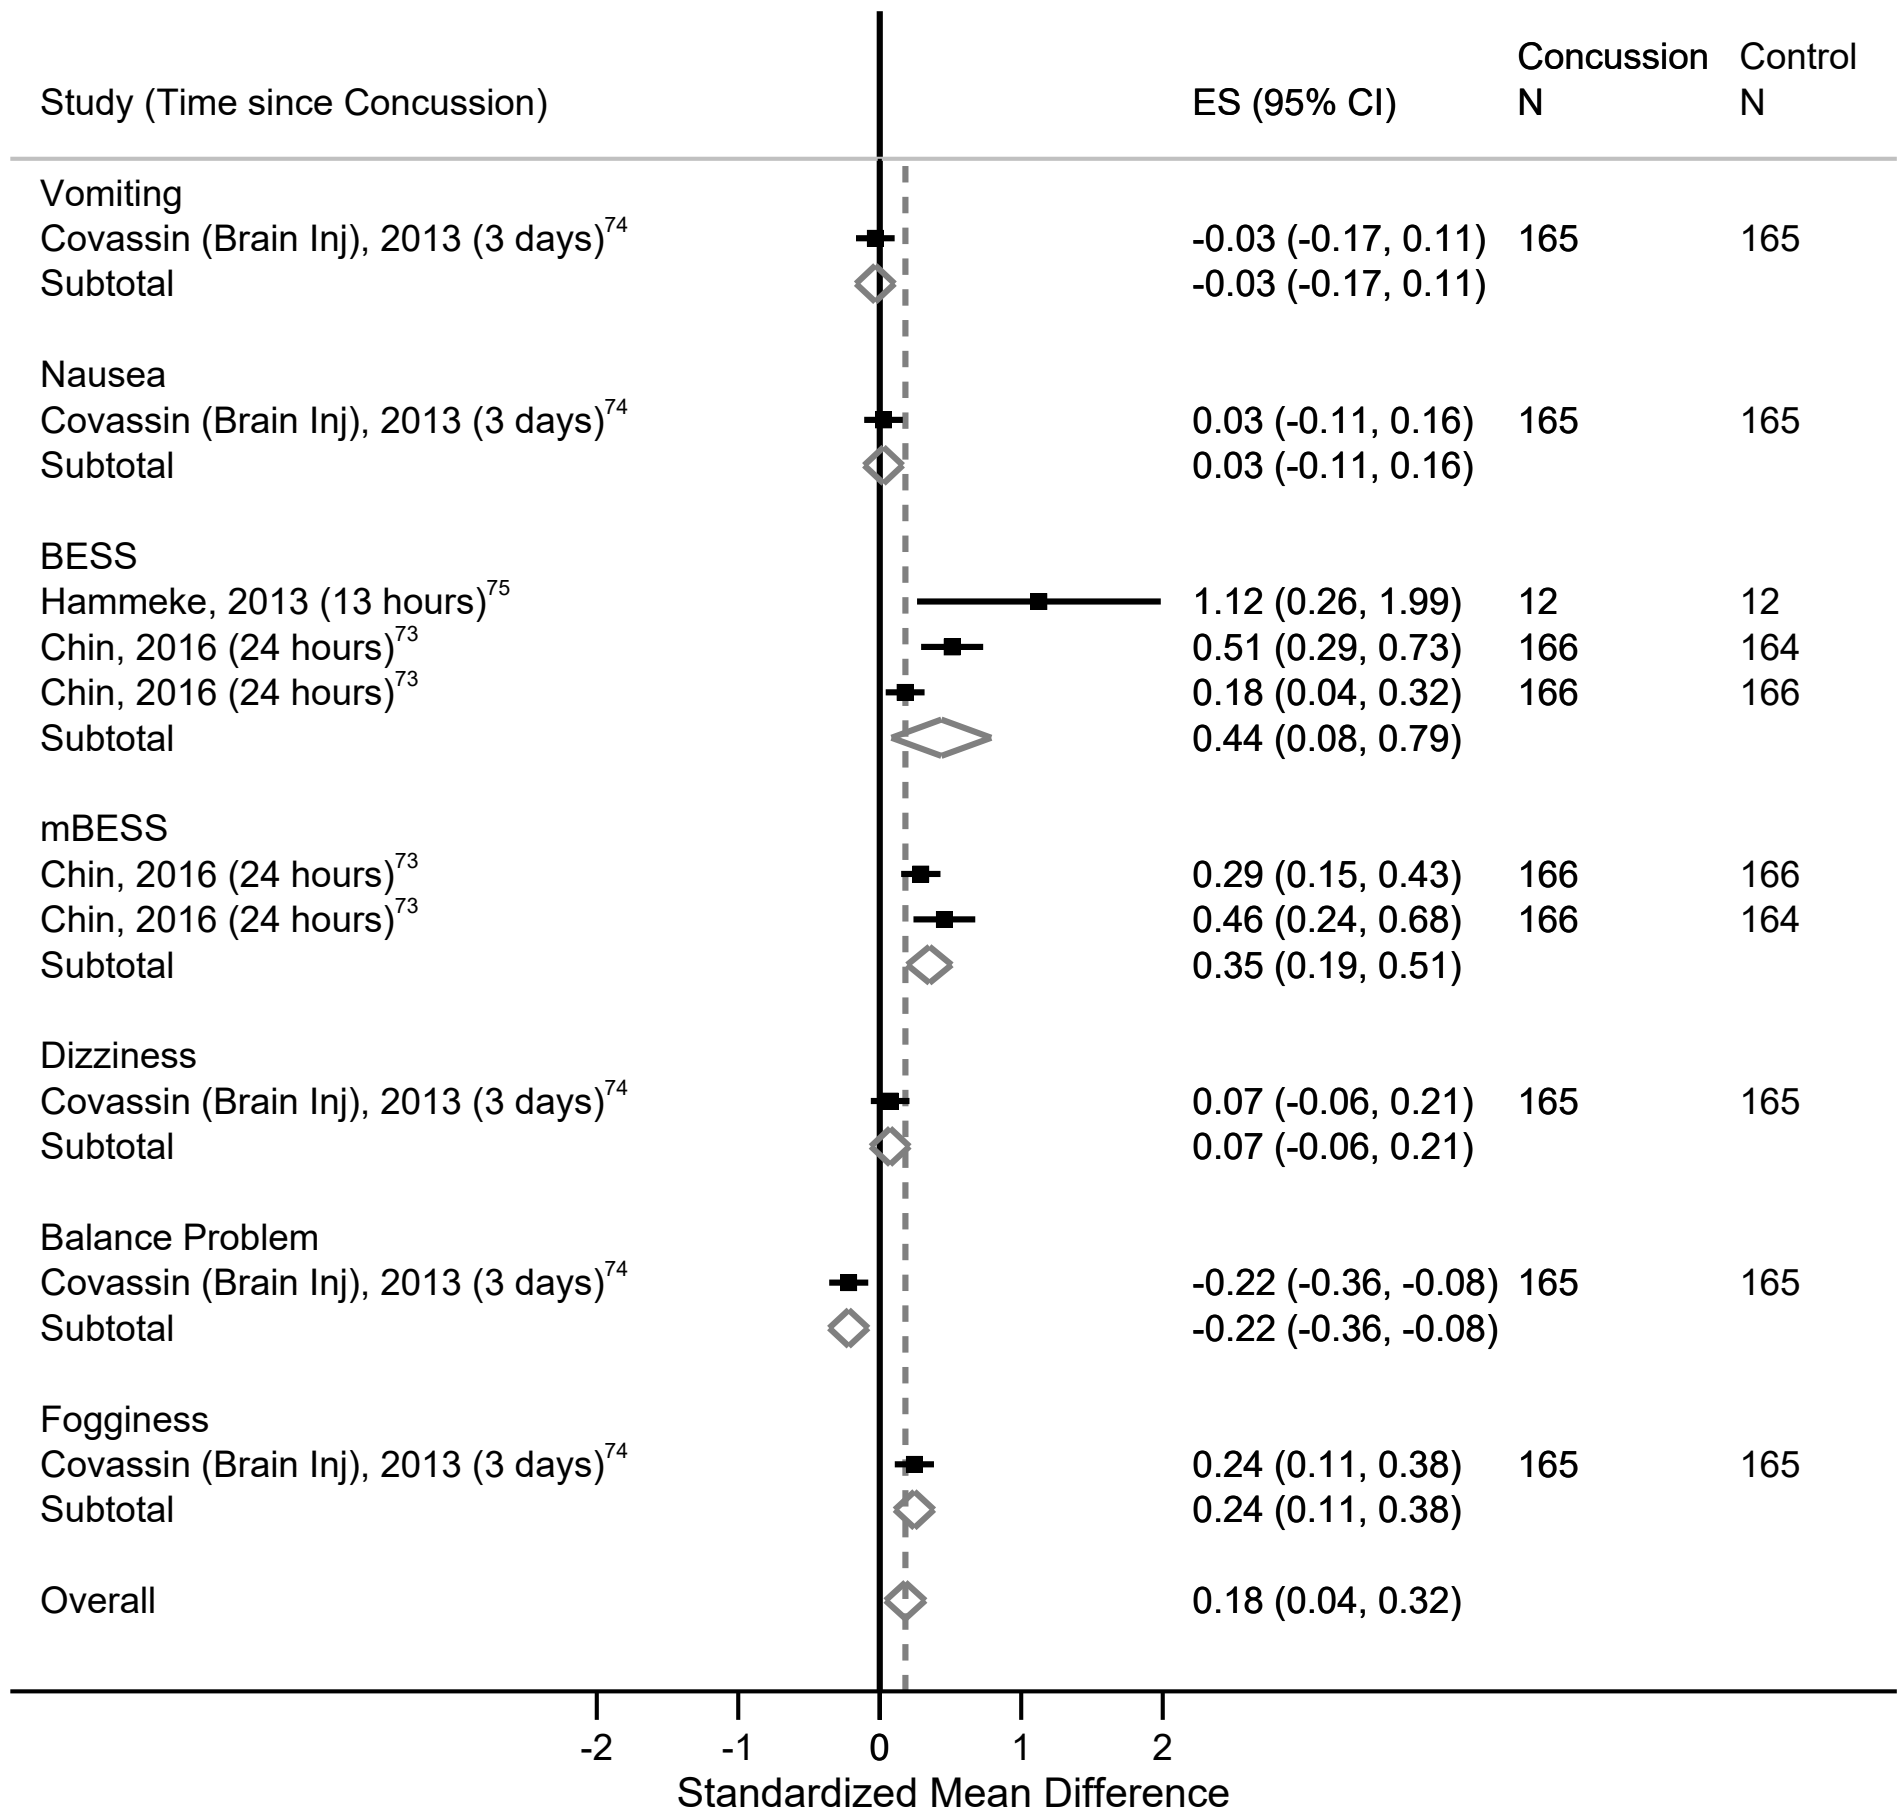



# Standardized Mean Difference (Vestibular) in Adult Patients

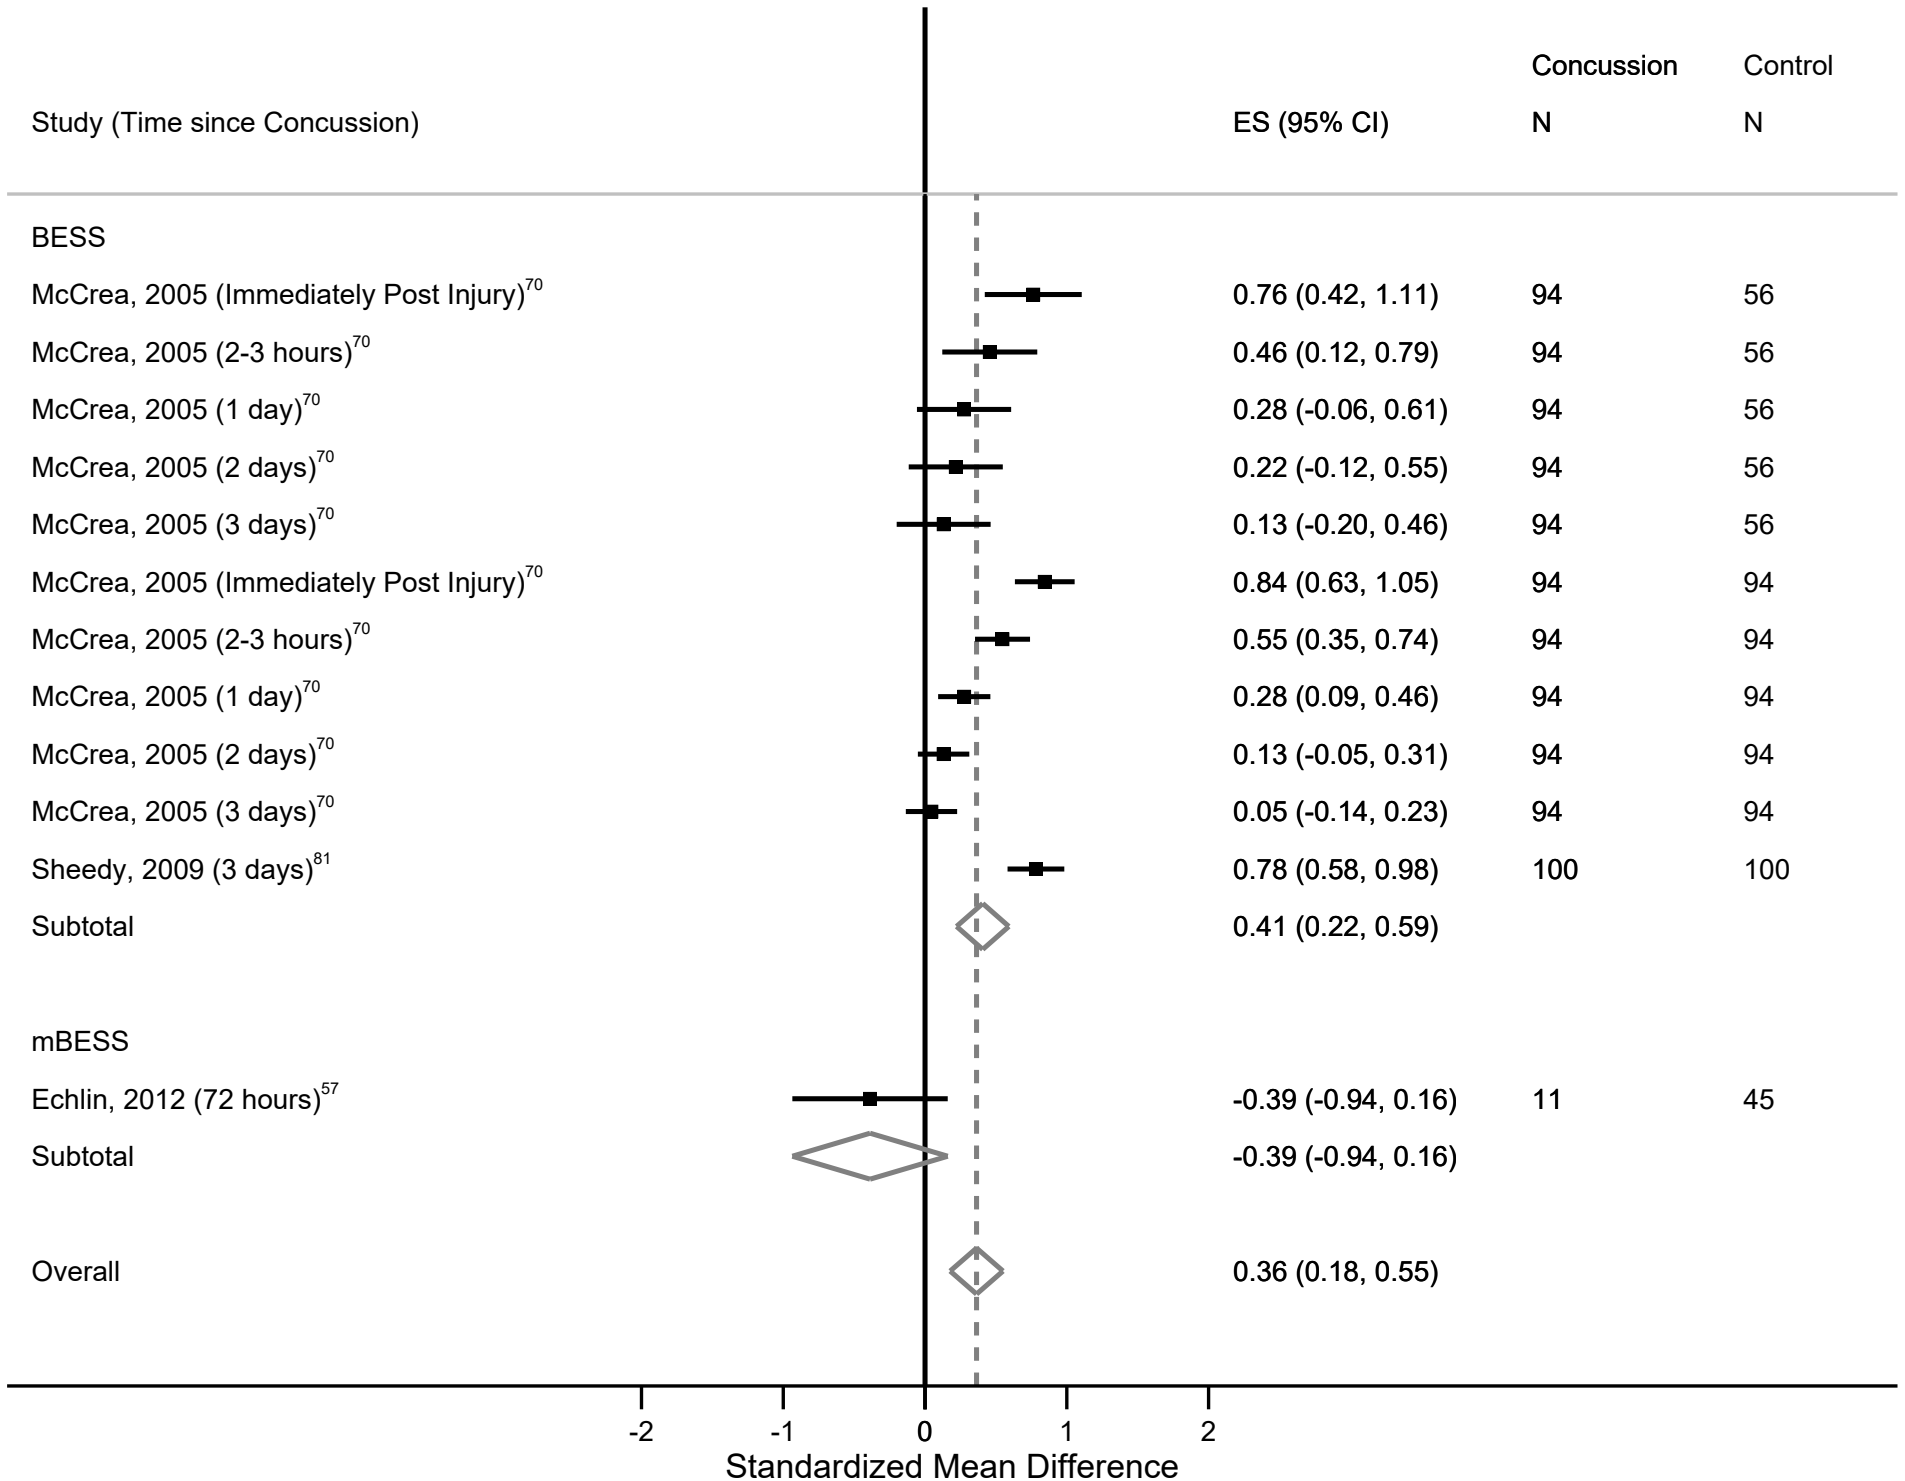

# Standardized Mean Difference (Anxiety/Mood) in Pediatric Patients

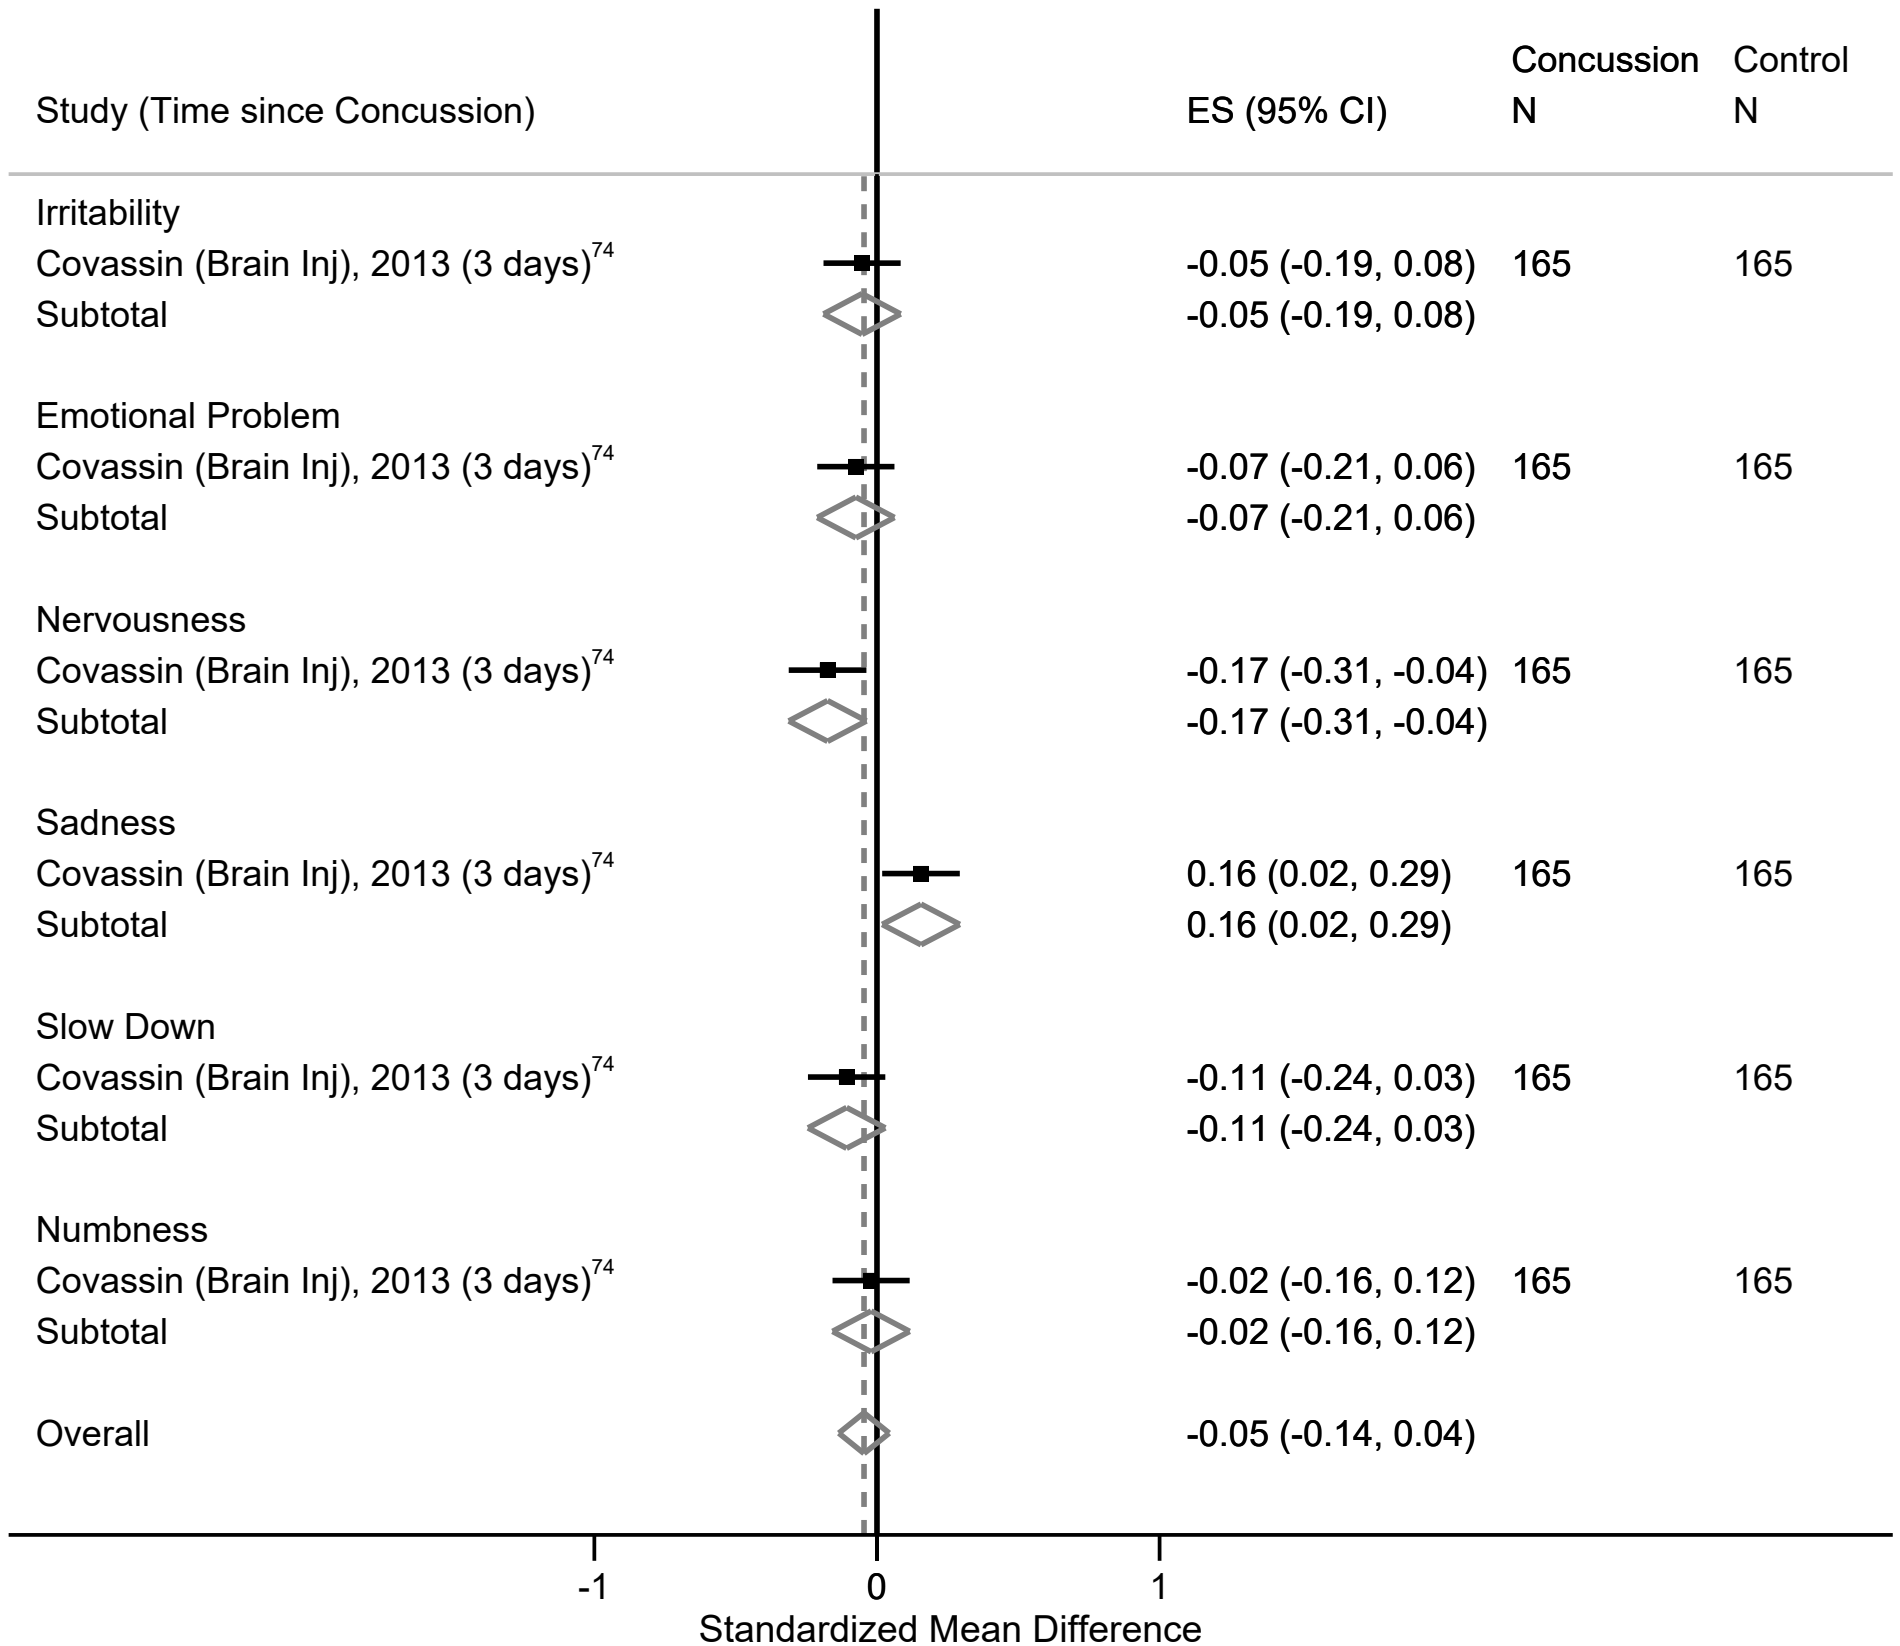

# Standardized Mean Difference (Sleep Disturbance) in Pediatric Patients

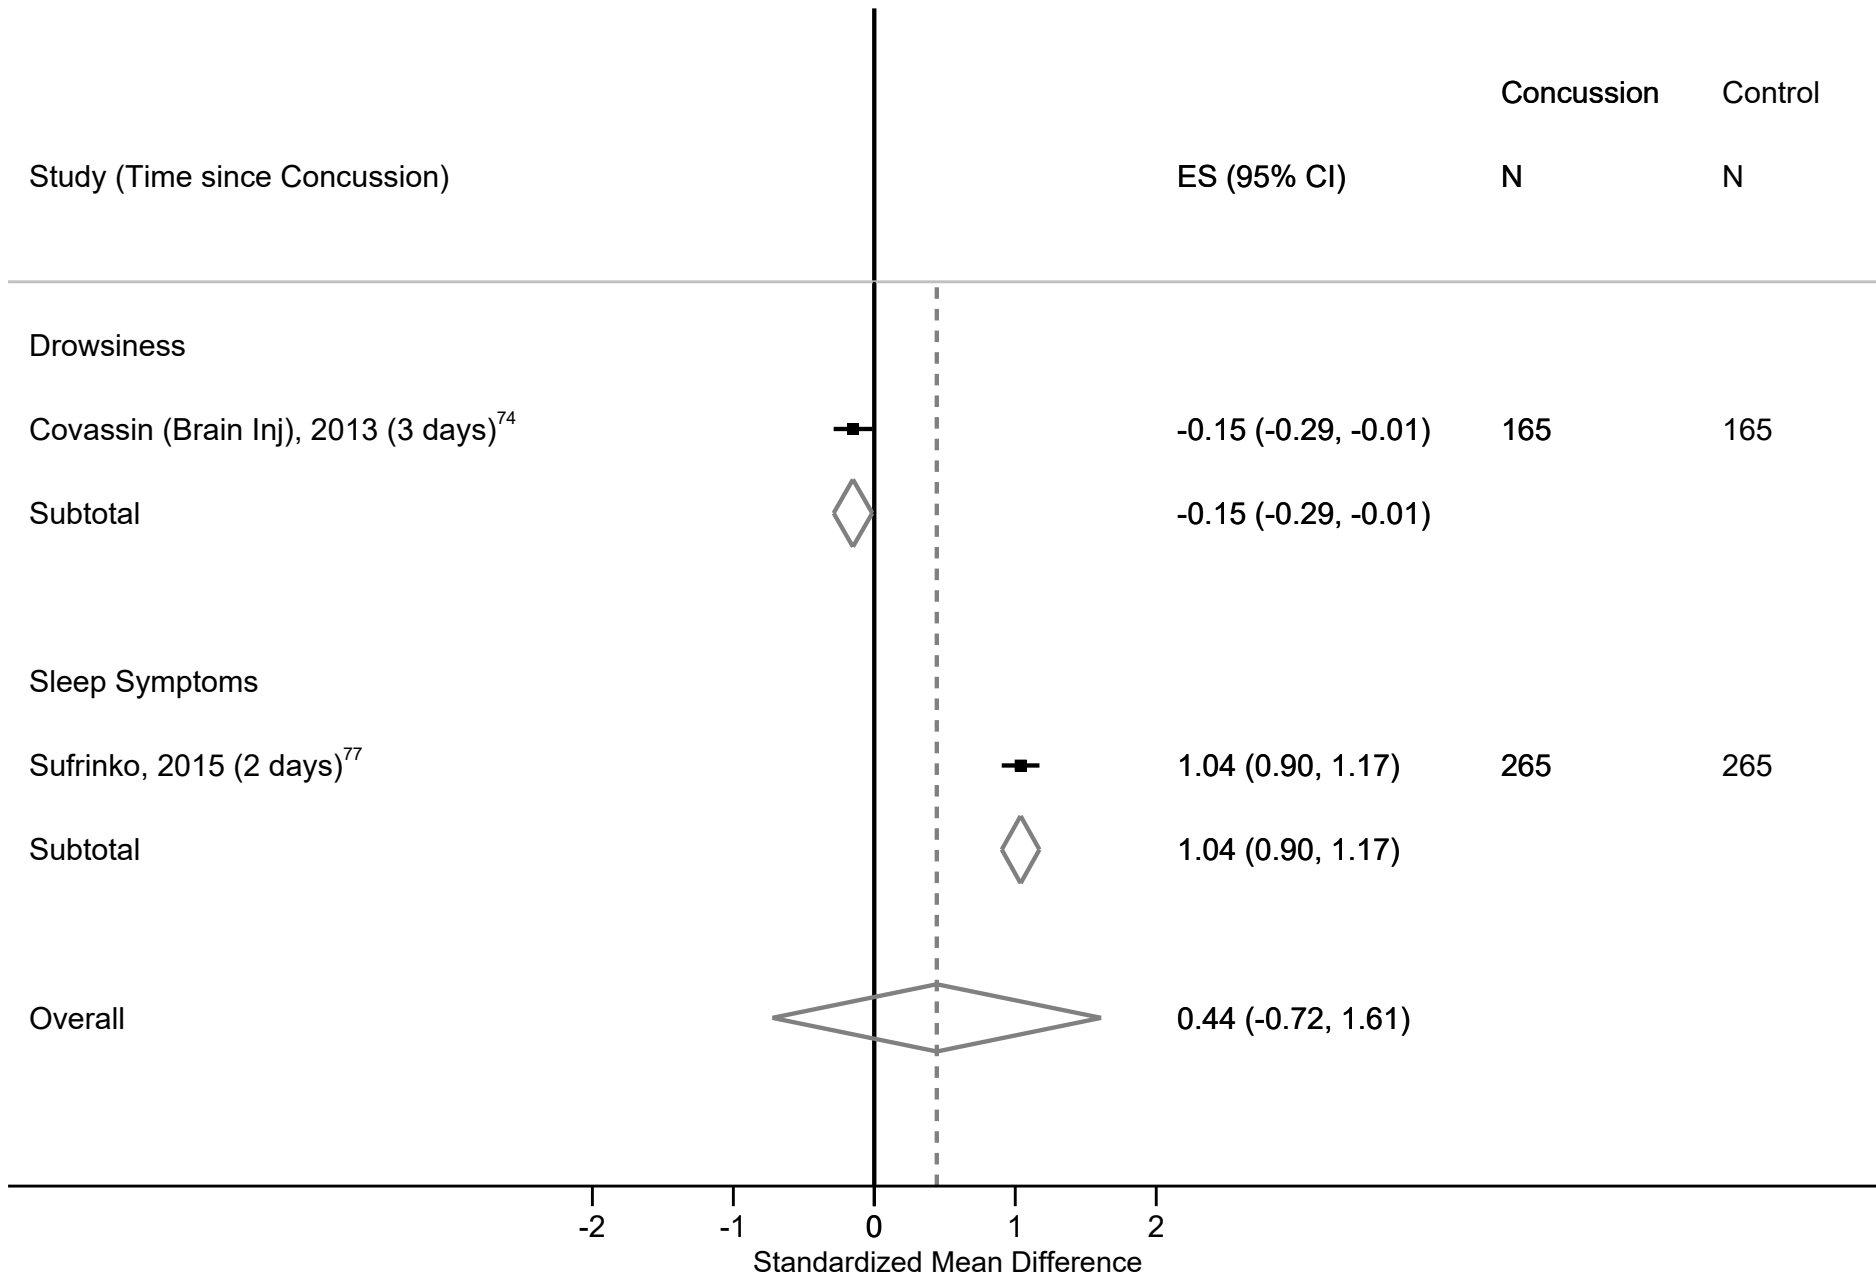

Supplement: nyz332_supplemental_file.pdf [file nyz332_supplemental_file.pdf]
